# Supplementary material for: Methotrexate Is a JAK/STAT Pathway Inhibitor
Source: PubMed Central journal article supplement (PMC4489434; doi:10.1371/journal.pone.0130078), 2015-07-01
Supplement: pone.0130078.s003.pdf [file pone.0130078.s003.pdf]

## S2 Table

| <i>Drosophila</i><br>Symbol | Gene Name                               | Unpaired | Unpaired2 | Unpaired3 | Human<br>homologue | Enzymatic Activity                                                                                                                      |
|-----------------------------|-----------------------------------------|----------|-----------|-----------|--------------------|-----------------------------------------------------------------------------------------------------------------------------------------|
| <i>Dhfr</i>                 | <i>Dihydrofolate reductase</i>          | -0.59    | 1.23      | 0.07      | DHFR               | dihydrofolate reductase                                                                                                                 |
| <i>pug</i>                  | <i>pugilist</i>                         | -0.21    | 0.84      | 0.15      | MTHFD1             | methylenetetrahydrofolate dehydrogenase (NADP+ dependent) 1, methenyltetrahydrofolate cyclohydrolase, formyltetrahydrofolate synthetase |
| <i>Prat2</i>                | <i>Phosphoribosylamidotransferase 2</i> | 0.46     | 0.25      | -0.79     | PPAT               | phosphoribosyl pyrophosphate amidotransferase                                                                                           |
| <i>ade3</i>                 | <i>adenosine 3</i>                      | 0.05     | -0.36     | -0.35     | GART               | phosphoribosylglycinamide formyltransferase, phosphoribosylglycinamide synthetase, phosphoribosylaminoimidazole synthetase              |
| <i>CG11089</i>              | <i>CG11089</i>                          | 0.10     | 0.44      | 1.00      | ATIC               | 5-aminoimidazole-4-carboxamide ribonucleotide formyltransferase/IMP cyclohydrolase                                                      |
| <i>Ts</i>                   | <i>Thymidylate synthetase</i>           | -0.42    | -0.71     | -0.79     | TYMS               | thymidylate synthetase                                                                                                                  |
| <i>hop</i>                  | <i>hopscotch</i>                        | -5.74    | -4.56     | -5.52     | JAK2               | tyrosine kinase                                                                                                                         |

*6x2xDrafLuc* JAK/STAT pathway reporter activity (expressed as z-scores) following knockdown of the indicated *Drosophila* genes and stimulation with the three ligands Unpaired, Unpaired2 and Unpaired3. Knockdown of enzymes central to the folate / purine and thymidine synthesis pathways do not interact significantly in any assay while knockdown of *hopscotch*, the *Drosophila* JAK homologue, produces a strong and consistent reduction in activity. Each screen was carried out in triplicate and scores shown are the mean of three replicates. Scores above +3 or below -3 are considered significant. Human homologues and their enzymatic activities are shown.
