# Supplementary material for: Methotrexate Is a JAK/STAT Pathway Inhibitor
Source: PLoS One. 2015 Jul 1;10(7):e0130078. doi: 10.1371/journal.pone.0130078 (PMC4489434; doi:10.1371/journal.pone.0130078)
Supplement: S1 Table — Table showing the details of the plates screened. Columns show: compound ID, Molecular name, plate number well position, content, CAS number, formula, molecular weight, reported bioactivity, source, approval status, references, and the calculated z-scores for the three replicates of the screen (Rep1, Rep2, Rep3, Rep4). The position of empty wells, wells treated with the positive control AG490 and wells containing the negative control DMSO are indicated for each plate. (PDF) [file pone.0130078.s002.pdf]

S1 Table

| Compound ID    | MoNAname                      | plate     | position | Content        | cas#                              | Formula        | MoWT      | Bioactivity                                                     | Source                                     | Status                 | Reference | Screen Score (z-score) |       |       |       | Average |
|----------------|-------------------------------|-----------|----------|----------------|-----------------------------------|----------------|-----------|-----------------------------------------------------------------|--------------------------------------------|------------------------|-----------|------------------------|-------|-------|-------|---------|
|                |                               |           |          |                |                                   |                |           |                                                                 |                                            |                        |           | rep1                   | rep2  | rep3  | rep4  |         |
| empty          |                               | 100122-01 | A01      | sample         |                                   |                |           |                                                                 | NA                                         |                        |           | NA                     | NA    | NA    | NA    |         |
| 01500372       | MAFENIDINE HYDROCHLORIDE      | 100122-01 | A02      | sample         | 138-39-6                          | C7H11ClN2O2S   | 222.69402 | antibacterial                                                   | synthetic                                  | USAN, INN, BAN         |           | 0.28                   | -1.37 | -0.82 | -2.36 | -1.07   |
| 01500373       | MAPROTILOLINE HYDROCHLORIDE   | 100122-01 | A03      | sample         | 103047-61-6, 10262-69-8           | C20H24ClN2O    | 313.47390 | antidepressant                                                  | synthetic                                  | USAN, INN, BAN         |           | 1.47                   | -1.74 | -0.91 | -0.61 | -0.45   |
| 01500374       | MECAMYLAMINE HYDROCHLORIDE    | 100122-01 | A04      | sample         | 826-39-1, 60-40-2                 | C11H22ClN2     | 233.75760 | antihypertensive                                                | synthetic                                  | USP, INN, BAN          |           | 0.88                   | 4.29  | -0.06 | -0.38 | 1.18    |
| 01500375       | MECHLORETHAMINE               | 100122-01 | A05      | sample         | 55-86-1, 51-75-2                  | C5H11ClN2      | 156.05612 | antineoplastic, alkylating agent                                | synthetic                                  | USP, INN, BAN, JAN     |           | -0.95                  | -1.74 | -1.12 | -1.98 | -1.70   |
| 01500376       | MELICLINE HYDROCHLORIDE       | 100122-01 | A06      | sample         | 31884-71-2, 1104-22-9             | C28H26ClN2     | 463.86225 | antiemetic                                                      | synthetic                                  | USP, INN, BAN, JAN     |           | -0.32                  | -2.98 | 1.68  | -1.87 | -0.87   |
| 01500377       | MELGEPONATE SODIUM            | 100122-01 | A07      | sample         | 6386-02-9                         | C14H17ClO2NaO2 | 318.1371  | antiflammatory, antipyretic                                     | synthetic                                  | USP                    |           | -0.01                  | -1.91 | -1.05 | -0.36 | -0.55   |
| 01500380       | MEDRYSONE                     | 100122-01 | A08      | sample         | 2668-86-8                         | C22H32O3       | 344.40854 | glucocorticoid                                                  | semisynthetic                              | USAN, INN              |           | 0.78                   | -1.19 | -1.10 | -0.47 | -0.50   |
| 01500381       | MEGESTROL ACETATE             | 100122-01 | A09      | sample         | 595-33-5, 3562-63-8               | C24H32O4       | 384.50204 | progestogen, antineoplastic                                     | semisynthetic                              | USP, INN, BAN          |           | -1.75                  | -2.51 | -1.01 | 0.85  | -1.11   |
| 01500382       | MELPHALAN                     | 100122-01 | A10      | sample         | 149-82-3                          | C11H11ClN2O2   | 305.20661 | antineoplastic, alkylating agent                                | synthetic                                  | USP, INN, BAN, JAN     |           | -0.12                  | -0.74 | 0.03  | -1.34 | -0.51   |
| 01500388       | MESTRANOL                     | 100122-01 | A11      | sample         | 72-33-3                           | C21H26O2       | 310.44017 | estrogen, with progesterone as oral contraceptive               | semisynthetic                              | USP, INN, BAN, JAN     |           | 1.56                   | -2.14 | -1.84 | -1.27 | -0.93   |
| 0.04% JAK2zhnb |                               | 100122-01 | A12      | 0.04% jak2zhnb |                                   |                |           |                                                                 |                                            |                        |           | 0.98                   | -3.38 | 1.79  | -1.91 | -0.63   |
| 0.04% DMSO     |                               | 100122-01 | B01      | 0.04% dmsso    |                                   |                |           |                                                                 |                                            |                        |           | -0.65                  | -1.33 | -1.07 | -1.61 | -1.17   |
| 01500390       | METAPROTERENOL                | 100122-01 | B02      | sample         | 586-06-1, 5874-97-5               | C11H17NO3      | 211.26304 | bronchodilator                                                  | synthetic                                  | USP, JAN               |           | -0.20                  | 0.30  | 0.20  | 0.21  | 0.21    |
| 01500391       | METHACHOLINE CHLORIDE         | 100122-01 | B03      | sample         | 62-61-1, 55-92-5                  | C8H18ClNO2     | 195.69116 | cholinergic, diagnostic aid                                     | synthetic                                  | USP, INN, BAN          |           | 0.43                   | -1.36 | -1.17 | -0.60 | 0.34    |
| 01500396       | METHMAZOLE                    | 100122-01 | B04      | sample         | 60-58-0                           | C4H4N2S2       | 114.16982 | antihypertihyroid                                               | synthetic                                  | USP, INN, BAN, JAN     |           | 0.48                   | 1.30  | 0.84  | 6.65  | 2.32    |
| 01500397       | METHOCARBAMOL                 | 100122-01 | B057     | sample         | 532-03-4                          | C11H11NO2S     | 211.2450  | muscle relaxant (skeletal)                                      | synthetic                                  | USP, INN, BAN, JAN     |           | 0.12                   | 2.22  | 0.37  | -0.95 | -0.33   |
| 01500398       | METHOTREXATE(=)               | 100122-01 | B06      | sample         | 60388-63-6                        | C20H22N8O5     | 454.44894 | antineoplastic, antirheumatic, folic acid antagonist            | synthetic                                  | AMETHOPTERIN           |           | -0.26                  | -9.36 | -8.49 | -8.77 | -8.72   |
| 01500399       | METHOXAMINE HYDROCHLORIDE     | 100122-01 | B07      | sample         | 61-16-5, 390-28-3                 | C11H18ClNO2    | 247.22401 | alpha 1 adrenoceptor agonist, vasoconstrictor                   | synthetic                                  | USP-XII, INN, BAN, JAN |           | -1.43                  | -1.83 | -0.45 | -0.97 | -1.17   |
| 01500403       | METHYLDOPA                    | 100122-01 | B08      | sample         | 41372-08-1, 555-30-6              | C11H14ClNO4    | 212.15941 | antihypertensive                                                | synthetic                                  | USP, INN, BAN, JAN     |           | -0.35                  | 0.13  | -0.26 | 2.17  | 0.42    |
| 01500406       | METHYLPREDNISOLONE            | 100122-01 | B09      | sample         | 83-43-2                           | C22H30O5       | 374.4814  | glucocorticoid                                                  | semisynthetic                              | USP, INN, BAN, JAN     |           | 0.73                   | -0.59 | -0.02 | 2.31  | 0.51    |
| 01500410       | METOCLOPRAMIDE HYDROCHLORIDE  | 100122-01 | B10      | sample         | 54143-67-6, 7232-21-5             | C14H23ClN2O2   | 326.26431 | antiemetic                                                      | synthetic                                  | USP, INN, BAN, JAN     |           | 0.04                   | -0.36 | -0.30 | 0.01  | -0.15   |
| 01500411       | METOPROLOL TARTRATE           | 100122-01 | B11      | sample         | 56392-17-7, 3750-58-6             | C19H31NO9      | 417.46022 | antihypertensive, antianginal                                   | synthetic                                  | USP, JAN               |           | -0.51                  | 0.90  | 2.77  | -0.01 | 0.79    |
| 0.04% JAK2zhnb |                               | 100122-01 | B12      | 0.04% jak2zhnb |                                   |                |           |                                                                 |                                            |                        |           | -1.80                  | -2.00 | -1.44 | -1.48 | -1.68   |
| 0.04% DMSO     |                               | 100122-01 | C01      | 0.04% dmsso    |                                   |                |           |                                                                 |                                            |                        |           | -1.93                  | -1.31 | -2.32 | 4.04  | -0.38   |
| 01500412       | METRONIDAZOLE                 | 100122-01 | C02      | sample         | 443-48-1, 69198-10-3              | C6H8N2O3       | 171.15693 | antiprotazoal                                                   | synthetic                                  | USP, INN, BAN, JAN     |           | -0.67                  | -0.09 | -0.70 | -1.46 | -0.73   |
| 01500414       | MINOCYCLINE HYDROCHLORIDE     | 100122-01 | C03      | sample         | 138148-67-1, 10118-90-8           | C23H26ClN3O7   | 423.54851 | antibacterial                                                   | semisynthetic                              | USAN, INN, BAN         |           | -0.49                  | 0.27  | -0.30 | -0.49 | -0.25   |
| 01500415       | MINOXIDIL                     | 100122-01 | C04      | sample         | 38304-91-5                        | C9H15NSO       | 209.2528  | antihypertensive, antilopacea agent                             | synthetic                                  | USP, INN, BAN          |           | 0.31                   | 0.80  | 0.35  | 0.54  | 0.31    |
| 01500418       | MOXALACTAM DISODIUM           | 100122-01 | C05      | sample         | 8031-09-2                         | C20H18N6Na2O9S | 564.44486 | antibacterial                                                   | semisynthetic                              | USAN, INN, BAN         |           | -0.50                  | -0.01 | -1.55 | 0.43  | -0.41   |
| 01500419       | NADIDE                        | 100122-01 | C06      | sample         | 53-84-6                           | C21H27N7O14P2  | 663.45544 | alcohol and narcotic antagonist                                 | synthetic                                  | USAN, INN, BAN, JAN    |           | -0.15                  | 3.17  | -0.23 | 0.45  | 0.58    |
| 01500420       | NACILIN SODIUM                | 100122-01 | C07      | sample         | 717-60-6, 985-16-0                | C21H21N2NaO2S  | 438.46577 | antibacterial                                                   | synthetic                                  | USP, INN, BAN, JAN     |           | -0.16                  | 1.17  | -0.60 | 1.77  | 0.02    |
| 01500422       | NALOXONE HYDROCHLORIDE        | 100122-01 | C08      | sample         | 357-08-4, 51481-60-8              | C19H22ClNO4    | 383.84444 | narcotic antagonist                                             | synthetic                                  | USP, INN, BAN, JAN     |           | -0.06                  | 0.01  | 0.33  | 0.37  | 0.16    |
| 01500424       | NAPHAZOLINE HYDROCHLORIDE     | 100122-01 | C09      | sample         | 550-99-2, 355-31-4                | C14H15ClNO2    | 246.74205 | adrenergic agonist, nasal decongestant                          | synthetic                                  | USP, INN, BAN, JAN     |           | -0.54                  | -0.16 | 2.17  | 0.11  | 0.40    |
| 01500425       | NAPROXEN                      | 100122-01 | C10      | sample         | 22204-02-1                        | C14H13O3       | 230.26588 | antirflamatory, analgesic, antipyretic                          | synthetic                                  | USP, INN, BAN, JAN     |           | -0.54                  | -0.01 | -0.04 | 0.01  | -0.09   |
| 01500428       | NEOSTIGMINE BROMIDE           | 100122-01 | C11      | sample         | 114-80-7, 59-99-4                 | C12H19BrN2O2   | 320.21043 | cholinergic                                                     | synthetic                                  | USP, INN, BAN          |           | -0.29                  | -0.17 | 1.55  | 0.16  | 0.31    |
| 0.11% JAK2zhnb |                               | 100122-01 | C12      | 0.11% jak2zhnb |                                   |                |           |                                                                 |                                            |                        |           | -4.94                  | -4.14 | -3.27 | -2.11 | -3.61   |
| 0.11% DMSO     |                               | 100122-01 | D01      | 0.11% dmsso    |                                   |                |           |                                                                 |                                            |                        |           | -0.50                  | 5.57  | 1.57  | 5.72  | 3.79    |
| 01500430       | NICIN                         | 100122-01 | D02      | sample         | 59-67-6                           | C6H5NO2        | 123.11225 | antihyperlipidemic, vitamin (enzyme cofactor)                   | widespread in the plant and fungal kingdom | USP, INN, JAN          |           | 1.28                   | 1.83  | 1.66  | 1.36  | 1.04    |
| 01500431       | NIFEDIPINE                    | 100122-01 | D03      | sample         | 21829-25-4                        | C17H18N2O6     | 346.34281 | antianginal, antihypertensive                                   | synthetic                                  | USP, INN, BAN          |           | 0.24                   | -0.08 | -0.94 | -0.99 | -0.44   |
| 01500433       | NITROFURANTOIN                | 100122-01 | D04      | sample         | 67-20-9, 54-87-5 [nitrofurantoin] | C8H8NO4S       | 238.16082 | antibacterial                                                   | synthetic                                  | USP, INN, BAN, JAN     |           | 1.59                   | -1.95 | -1.18 | -1.67 | -0.80   |
| 01500395       | OXYSULTINAMIDE                | 100122-01 | D05      | sample         | 1506-46-9                         | C22H25ClNO3    | 323.85024 | anticholinergic                                                 | synthetic                                  | USP, INN, BAN          |           | 1.89                   | -1.25 | -0.69 | -0.31 | 0.74    |
| 01500436       | NOREPINEPHRINE                | 100122-01 | D06      | sample         | 69815-49-2, 51-40-1               | C8H11NO3       | 169.18177 | adrenergic agonist, antihypertensive                            | synthetic                                  | USP, INN, BAN          |           | -0.31                  | 0.94  | 0.26  | 5.84  | 1.68    |
| 01500437       | NORETHINDRONE                 | 100122-01 | D07      | sample         | 68-22-4                           | C20H26O2       | 286.42002 | progesten                                                       | synthetic                                  | USP, INN, BAN, JAN     |           | -0.41                  | -0.81 | 2.93  | -0.06 | 0.42    |
| 01500439       | NORETHYNDROL                  | 100122-01 | D08      | sample         | 68-22-4                           | C20H26O2       | 286.42002 | progestogen, in combination with estrogen as oral contraceptive | synthetic                                  | USP, INN, BAN, JAN     |           | 0.63                   | 0.34  | 0.77  | 1.24  | 0.75    |
| 01500440       | NORFLOXACIN                   | 100122-01 | D09      | sample         | 70459-96-7                        | C18H18FN3O3    | 319.33565 | antibacterial                                                   | synthetic                                  | USP, INN, BAN, JAN     |           | 2.72                   | 0.42  | -0.26 | -0.31 | 0.64    |
| 01500441       | NORGESTREL                    | 100122-01 | D10      | sample         | 6533-00-2                         | C21H28O2       | 312.45611 | progestogen                                                     | synthetic                                  | USP, INN, BAN, JAN     |           | 0.23                   | -0.77 | 0.64  | 2.91  | 0.75    |
| 01500442       | NORTRIPTYLIN                  | 100122-01 | D11      | sample         | 894-71-3, 72-69-5                 | C19H21N        | 263.35952 | antidepressant                                                  | synthetic                                  | USP, INN, BAN, JAN     |           | -0.80                  | -1.22 | 0.17  | -0.07 | -0.48   |
| 0.11% JAK2zhnb |                               | 100122-01 | D12      | 0.11% jak2zhnb |                                   |                |           |                                                                 |                                            |                        |           | -1.16                  | -4.14 | -3.04 | -2.86 | -2.43   |
| 0.11% JAK2zhnb |                               | 100122-01 | E01      | 0.11% jak2zhnb |                                   |                |           |                                                                 |                                            |                        |           | -3.42                  | -3.75 | -3.75 | -2.32 | -3.31   |
| 01500443       | NOSCAPINE HYDROCHLORIDE       | 100122-01 | E02      | sample         | 912-60-7, 128-62-1 [noscapine]    | C22H24ClNO7    | 449.86208 | antitussive                                                     | Corydalis cava and Papaver spp             | USP, INN, BAN, JAN     |           | -0.59                  | 1.23  | -0.93 | -0.10 | 0.00    |
| 01500444       | NOVOBIBENZOL                  | 100122-01 | E03      | sample         | 1476-60-5, 303-81-1               | C15H18NO2NaCl  | 334.62175 | nervous and S gireous                                           | USP                                        |                        |           | -0.20                  | -1.17 | -0.33 | -1.48 | -1.04   |
| 01500445       | NYLIDRIN HYDROCHLORIDE        | 100122-01 | E04      | sample         | 845-58-8                          | C19H26ClNO2    | 335.87757 | vasodilator (peripheral)                                        | synthetic                                  | USP-XII, INN, BAN      |           | 1.32                   | 1.43  | 0.22  | 0.42  | 0.72    |
| 01500446       | NYSTATIN                      | 100122-01 | E05      | sample         | 114-90-9                          | C47H75NO17     | 926.1183  | antifungal, binds to membrane sterols                           | Streptomyces noursei                       | USP, INN, BAN, JAN     |           | -4.46                  | 0.15  | 0.38  | 0.68  | -0.82   |
| 01500447       | OPHTHADECAN CITRATE           | 100122-01 | E06      | sample         | 4682-36-4, 83-98-7                | C19H31NO8      | 451.51657 | muscle relaxant (skeletal), antisthmias                         | synthetic                                  | USP, INN, BAN          |           | 1.74                   | 0.44  | 1.16  | -0.05 | 0.83    |
| 01500448       | OXACILIN SODIUM               | 100122-01 | E07      | sample         | 7246-36-2, 11773-88-2             | C18H18N2NaO5S  | 324.36285 | antibacterial                                                   | synthetic                                  | USP, INN, BAN, JAN     |           | 0.96                   | 1.13  | 0.57  | 0.10  | 0.80    |
| 01500451       | OXYBENATE                     | 100122-01 | E08      | sample         | 311-57-7                          | C14H12O3       | 228.24994 | ultraviolet screen                                              | synthetic                                  | USP, INN               |           | 0.58                   | 0.40  | 0.17  | -0.34 | 0.20    |
| 01500453       | OXYMETAZOLINE HYDROCHLORIDE   | 100122-01 | E09      | sample         | 2315-02-8, 1491-59-4              | C18H25ClNO2    | 296.84345 | adrenergic agonist, nasal decongestant                          | synthetic                                  | USP, INN, BAN, JAN     |           | 0.83                   | -0.38 | 0.01  | -0.29 | 0.04    |
| 01500455       | OXYPHENISONE                  | 100122-01 | E10      | sample         | 7081-38-1, 129-20-4               | C24H32O2       | 324.36285 | antiflammatory                                                  | synthetic                                  | USP-XIII, INN, BAN     |           | 0.96                   | 1.13  | 0.57  | 0.10  | 0.80    |
| 01500457       | OXYTETRACYCLINE               | 100122-01 | E11      | sample         | 6153-84-6, 79-57-2                | C24H26ClNO9    | 496.90555 | antibacterial                                                   | Streptomyces rimosus                       | USP, INN, BAN, JAN     |           | 3.08                   | -1.03 | 0.44  | -0.33 | 0.54    |
| 0.11% DMSO     |                               | 100122-01 | E12      | 0.11% dmsso    |                                   |                |           |                                                                 |                                            |                        |           | -1.77                  | -1.56 | -0.73 | 6.46  | 0.60    |
| 0.11% JAK2zhnb |                               | 100122-01 | F01      | 0.11% jak2zhnb |                                   |                |           |                                                                 |                                            |                        |           | -2.79                  | -2.92 | -2.46 | -3.42 | -2.90   |
| 01500459       | PAPVERINE HYDROCHLORIDE       | 100122-01 | F02      | sample         | 61-25-6, 58-74-2 [papaverine]     | C20H22ClNO4    | 375.85564 | muscle relaxant (smooth), cerebral vasodilator                  | Papaver somniferum, Rauwolfia serpentina   | USP, BAN, JAN          |           | 0.74                   | 0.04  | -1.75 | -0.77 | -0.77   |
| 01500460       | PARACHLOROPHENOL              | 100122-01 | F03      | sample         | 106-48-9                          | C6H5ClO        | 128.55915 | topical antibacterial (antiseptic)                              | synthetic                                  | USP                    |           | -0.46                  | 1.68  | 4.32  | -0.73 | 1.80    |
| 01500462       | PARGYLINE HYDROCHLORIDE       | 100122-01 | F04      | sample         | 306-07-0, 555-57-7 [pargyline]    | C11H14ClNO     | 195.69393 | antihypertensive                                                | synthetic                                  | USP, INN, BAN          |           | 2.02                   | 1.44  | 0.76  | 4.50  | 2.18    |
| 01500464       | PENICILLAMINE                 | 100122-01 | F05      | sample         | 52-67-8                           | C5H11NO2S      | 149.21292 | chelating agent (Cu), antirheumatic                             | synthetic                                  | USP, INN, BAN, JAN     |           | 0.18                   | 1.14  | 1.18  | 0.29  | 1.35    |
| 01500472       | PHENACEMIDE                   | 100122-01 | F06      | sample         | 63-86-9                           | C9H11NO2       | 178.19225 | anticonvulsant                                                  | synthetic                                  | USP-XIII, INN, BAN     |           | 2.09                   | 0.27  | 0.02  | 0.27  | 0.05    |
| 01500473       | PHENAZOPYRIDINE HYDROCHLORIDE | 100122-01 | F07      | sample         | 136-40-3, 94-78-0                 | C11H12ClNO5    | 249.70479 | analgesic                                                       | synthetic                                  | USP, INN, BAN          |           | 2.51                   | 1.28  | 0.87  | 0.96  | 1.41    |
| 01500476       | PHENELZINE SULFATE            | 100122-01 | F08      | sample         | 156-51-4, 51-71-8 [phenelzine]    | C8H14N2O4S     | 284.27578 | antidepressant                                                  | synthetic                                  | USP, INN, BAN          |           | 0.36                   | 0.94  | 1.00  | 1.11  | 0.85    |
| 01500477       | PHENINDOLINE                  | 100122-01 | F09      | sample         | 83-12-5                           | C15H11O2       | 222.22575 | anticoagulant                                                   | synthetic                                  | USP-XIII, INN, BAN     |           | 1.00                   | -0.24 |       |       |         |

| Compound ID MoNAme |                                | plate     | position | Content        | cas#                          | Formula         | MoWt       | Bioactivity                                           | Source                                | Status                     | Reference                                            | Screen Score (z-score) |       |       |       |       | Average |
|--------------------|--------------------------------|-----------|----------|----------------|-------------------------------|-----------------|------------|-------------------------------------------------------|---------------------------------------|----------------------------|------------------------------------------------------|------------------------|-------|-------|-------|-------|---------|
|                    |                                |           |          |                |                               |                 |            |                                                       |                                       |                            |                                                      | rep1                   | rep2  | rep3  | rep4  |       |         |
| 01901200           | XYLAZINE                       | 100122-02 | C06      | sample         | 23076-35-9, 7361-61-7         | C12H16N2S       | 220.33872  | analgesic                                             | USP, INN, BAN                         | synthetic                  |                                                      | 0.26                   | -0.35 | -0.53 | 0.12  | -0.12 |         |
| 01901201           | TOLAZAMIDE                     | 100122-02 | C07      | sample         | 1156-19-0                     | C14H21N3O3S     | 311.40577  | antidiabetic                                          | USP, INN, BAN, JAN                    | synthetic                  |                                                      | 0.35                   | -0.48 | -0.46 | -0.29 | 0.03  | 0.62    |
| 01901202           | GALANTHAMINE HYDROBROMIDE      | 100122-02 | C08      | sample         | 357-70-0, 1953-04-4           | C17H22BN3       | 368.27379  | anticholinesterase, analgesic, antiAlzheimer          | USAN                                  |                            | Galanthin, Narcissus and other Liliaceae             | -0.43                  | -0.69 | 0.35  | 5.13  | 0.19  | 0.64    |
| 01901203           | FENETIMIDE                     | 100122-02 | C09      | sample         | 65646-48-4                    | C20H13N3O2      | 301.05841  | antidepressant                                        | USAN, INN                             | synthetic                  | USAN, INN, BAN, JAN                                  | 1.12                   | -0.49 | -0.49 | 0.08  | 0.84  | 0.11    |
| 01901214           | ENALAPRIL MALEATE              | 100122-02 | C10      | sample         | 76095-16-4, 75847-73-3        | C24H32N2O9      | 492.53064  | ACE inhibitor, antihypertensive                       | USP, INN, BAN, JAN                    | synthetic                  |                                                      | -0.77                  | -0.52 | -0.58 | -0.10 | -0.20 |         |
| 01901215           | KETOPROFEN                     | 100122-02 | C11      | sample         | 22071-15-4                    | C16H14O3        | 254.28815  | antiinflammatory                                      | USP, INN, BAN, JAN                    | synthetic                  |                                                      | 0.64                   | -0.58 | 0.33  | 0.40  | 0.03  |         |
| 0.11% JAK2inhb     |                                | 100122-02 | C12      | 0.11% jak2inhb |                               |                 |            |                                                       |                                       |                            |                                                      | -0.72                  | -1.92 | -0.42 | -4.83 | -0.27 |         |
| 0.11% DMSO         |                                | 100122-02 | D01      | 0.11% dms0     |                               |                 |            |                                                       |                                       |                            |                                                      | -1.34                  | -1.67 | -1.85 | -2.92 | -1.95 |         |
| 01901217           | LISINAPRIL                     | 100122-02 | D02      | sample         | 83915-83-7, 76547-98-3        | C21H31N3O5      | 405.49832  | ACE inhibitor                                         | USP, INN, BAN, JAN                    | synthetic                  |                                                      | 0.88                   | 0.75  | 2.50  | -1.77 | 0.59  |         |
| 01902004           | BUMETANIDE                     | 100122-02 | D03      | sample         | 28395-03-1                    | C17H20N2O5S     | 364.42335  | diuretic                                              | USP, INN, BAN, JAN                    | synthetic                  |                                                      | -0.67                  | 0.51  | 0.12  | 2.91  | 1.87  |         |
| 01902005           | CARBENOXOLONE SODIUM           | 100122-02 | D04      | sample         | 7421-40-1, 5697-56-3          | C34H48N2O7      | 614.73705  | antiinflammatory, antineoplastic, antitumor           | USAN, INN, BAN, JAN                   | synthetic                  |                                                      | -0.20                  | -0.40 | -0.40 | -0.40 | -0.70 |         |
| 01902020           | FOLIC ACID                     | 100122-02 | D05      | sample         | 59-30-3                       | C19H19N7O6      | 441.40658  | hematopoietic vitamin                                 | liver, kidney, green plants and fungi | USP, INN, BAN, JAN         |                                                      | 1.12                   | 1.61  | 0.17  | -1.17 | 0.12  |         |
| 01902021           | PTHALYL SULFATHIAZOLE          | 100122-02 | D06      | sample         | 85-73-4                       | C17H13N3O5S2    | 403.43626  | antibacterial                                         | USP, XX, INN, BAN                     | synthetic                  |                                                      | 1.01                   | 0.79  | 1.32  | 0.03  | 0.79  |         |
| 01902025           | SUCCINYL SULFATHIAZOLE         | 100122-02 | D07      | sample         | 116-43-0                      | C18H13N3O5S2    | 418.31386  | antibacterial                                         | USP, XXII, INN, BAN                   | synthetic                  |                                                      | -0.02                  | 0.33  | 0.33  | 0.33  | 0.33  |         |
| 01902026           | TRANEXAMIC ACID                | 100122-02 | D08      | sample         | 1197-18-8                     | C8H15NO2        | 157.21425  | hemostatic                                            | USAN, INN, BAN, JAN                   | synthetic                  |                                                      | 0.77                   | 2.48  | 0.29  | 0.02  | 0.89  |         |
| 01902028           | CEPHALEXIN                     | 100122-02 | D09      | sample         | 23325-78-2, 15086-71-2        | C16H17N3O4S     | 347.39559  | antibacterial                                         | USP, INN, BAN, JAN                    | semisynthetic              |                                                      | -0.66                  | -0.40 | -0.46 | -0.14 | -0.41 |         |
| 01902030           | OXOLINIC ACID                  | 100122-02 | D10      | sample         | 14608-29-4                    | C13H11NO3       | 261.20532  | antibacterial                                         | USAN, INN, BAN                        | synthetic                  |                                                      | -0.07                  | -0.90 | 0.07  | 1.30  | 0.10  |         |
| 01902031           | CEFOXITIM SODIUM               | 100122-02 | D11      | sample         | 650049-11, 61622-34-2         | C16H18N4NO7S2   | 449.43692  | antibacterial                                         | USP, INN, BAN, JAN                    | semisynthetic              |                                                      | -0.83                  | -0.72 | -0.58 | 0.69  | -0.36 |         |
| 0.11% JAK2inhb     |                                | 100122-02 | D12      | 0.11% jak2inhb |                               |                 |            |                                                       |                                       |                            |                                                      | -1.70                  | -3.91 | -2.35 | -2.73 | -3.10 |         |
| 0.11% JAK2inhb     |                                | 100122-02 | E01      | 0.11% jak2inhb |                               |                 |            |                                                       |                                       |                            |                                                      | -3.42                  | -3.39 | -1.12 | -3.52 | -2.17 |         |
| 01902032           | SURAMIN                        | 100122-02 | E02      | sample         | 129-46-4, 145-63-1 [suramin]  | C51H48N6NaO23S6 | 1429.19885 | antiprolizotax, trypanocidal, antiviral               | USP                                   | synthetic, Bayer-205, 300F |                                                      | 0.01                   | 0.67  | 0.81  | -0.79 | 0.18  |         |
| 01902033           | CEFUROXIME SODIUM              | 100122-02 | E03      | sample         | 56238-63-2                    | C16H15N4NaO8S   | 464.37375  | antibacterial                                         | USAN, INN, BAN                        | semisynthetic              |                                                      | -0.21                  | -0.11 | 1.33  | -1.41 | -0.10 |         |
| 01902036           | VIGABATRIN                     | 100122-02 | E04      | sample         | 60643-86-9                    | OH11NO2         | 129.16007  | anticonvulsant                                        | USAN, INN, BAN                        | synthetic                  | MDL-71754                                            | 0.26                   | 0.86  | 0.24  | -0.02 | 0.33  |         |
| 01902037           | LOMEFLOXACIN HYDROCHLORIDE     | 100122-02 | E05      | sample         | 98079-62-8, 98079-51-7        | C17H20FN3O3     | 387.81705  | antibacterial                                         | USAN, JAN                             | synthetic                  |                                                      | -0.06                  | 0.14  | 0.73  | 0.14  | 0.26  |         |
| 01902038           | CEFAMANDOLE SODIUM             | 100122-02 | E06      | sample         | 34444-01-4                    | C18H17N6NaO5S2  | 484.49119  | antibacterial                                         | USAN, INN, BAN                        | semisynthetic              |                                                      | 2.01                   | 1.57  | 0.80  | 1.01  | 1.50  |         |
| 01902040           | CEFMETAZOLE SODIUM             | 100122-02 | E07      | sample         | 56796-39-5                    | C15H16N7NaO5S3  | 493.52047  | antibacterial                                         | USAN, INN                             | synthetic                  |                                                      | -0.29                  | -0.43 | -0.53 | -0.49 | -0.32 |         |
| 01902042           | CEFOPERAZONE SODIUM            | 100122-02 | E08      | sample         | 62893-20-3, 62893-19-0        | C22H26N8NaO6S2  | 667.65927  | antibacterial                                         | USAN, INN, BAN, JAN                   | semisynthetic              |                                                      | -0.19                  | 0.30  | -0.21 | 0.21  | 0.03  |         |
| 01902044           | OFLOXACIN                      | 100122-02 | E09      | sample         | 824183-02-1                   | C18H20FN3O4     | 381.3762   | antibacterial                                         | USAN, INN, BAN                        | synthetic                  |                                                      | -0.51                  | -0.51 | -0.19 | -0.53 | -0.61 |         |
| 01902046           | BEZAFIBRATE                    | 100122-02 | E10      | sample         | 41859-07-2                    | C18H20ClNO4     | 381.82855  | antihyperlipidemic                                    | USAN, INN, BAN, JAN                   | synthetic                  |                                                      | 0.15                   | -0.47 | -0.58 | 0.41  | 0.88  |         |
| 01905371           | CETIRIZINE HYDROCHLORIDE       | 100122-02 | E11      | sample         | 83881-52-1                    | C21H27ClN3O2    | 461.81994  | H1 antihistamine                                      | USAN, INN, BAN, JAN                   | synthetic                  |                                                      | -3.93                  | -0.97 | 0.42  | -0.03 | -1.13 |         |
| 0.11% DMSO         |                                | 100122-02 | E12      | 0.11% dms0     |                               |                 |            |                                                       |                                       |                            |                                                      | -2.34                  | -1.11 | -0.34 | -1.82 | -1.64 |         |
| 0.11% JAK2inhb     |                                | 100122-02 | F01      | 0.11% jak2inhb |                               |                 |            |                                                       |                                       |                            |                                                      | -1.89                  | -3.92 | -2.73 | -4.64 | -3.30 |         |
| 01905398           | PHENYLETHYL ALCOHOL            | 100122-02 | F02      | sample         | 60-12-8                       | C8H10O          | 122.1683   | antimicrobial                                         | USP, BAN                              | synthetic                  |                                                      | 0.50                   | 0.37  | 0.29  | -0.96 | 0.05  |         |
| 01905118           | MECLOCYCLINE SULFASALICYLATE   | 100122-02 | F03      | sample         | 73816-42-9, 20135-58-3        | C27H27ClN2O14S  | 695.05054  | antibacterial                                         | USAN, INN, BAN                        | synthetic                  | US-2989, NSC-78502                                   | 2.23                   | 0.03  | -0.25 | 4.73  | 1.68  |         |
| 01905347           | RIBOFLAVIN                     | 100122-02 | F04      | sample         | 83-88-5                       | C17H20N4O5      | 376.37215  | Vitamin B2, Vitamin cofactor, L5050(rat) 560 mg/kg ip | USP, INN, BAN, JAN                    | synthetic                  |                                                      | 0.14                   | 0.05  | 0.85  | -1.01 | 0.21  |         |
| 01905065           | ACEBUTOLOL HYDROCHLORIDE       | 100122-02 | F05      | sample         | 34381-68-5, 37517-30-9        | C18H25ClNO4     | 372.85953  | antihypertensive, antitussive, antianxiety            | USAN, INN, BAN                        | synthetic                  |                                                      | 0.84                   | 0.53  | -0.15 | 3.30  | 0.88  |         |
| 01905306           | ASPARTAME                      | 100122-02 | F06      | sample         | 22839-47-0                    | C14H18N2O5      | 294.30996  | sweetener                                             | USAN, NF, INN, BAN                    | synthetic                  |                                                      | -0.11                  | -0.18 | 2.62  | 0.88  | 1.03  |         |
| 01905374           | VARIDENAFIL HYDROCHLORIDE      | 100122-02 | F07      | sample         | 224789-1-5                    | C25H33ClN6O4S   | 525.07426  | inhibits erectile dysfunction, PDE5 inhibitor         | USP, INN, BAN                         | synthetic                  |                                                      | 0.85                   | -0.55 | 0.55  | 0.85  | 0.25  |         |
| 01905396           | FLUORESCEN                     | 100122-02 | F08      | sample         | 2321-07-5                     | C20H12O5        | 332.31564  | conneal trauma treatment                              | USP, BAN, JAN                         | synthetic                  |                                                      | 0.98                   | 0.34  | 0.01  | 0.82  | 0.54  |         |
| 01905397           | NACINAMIDE                     | 100122-02 | F09      | sample         | 98-92-0                       | C8H10N2O        | 122.12752  | Vitamin B3, enzyme cofactor, anti-pellagra            | USP, INN, JAN                         | synthetic                  |                                                      | 0.20                   | -0.22 | -0.72 | 0.51  | -0.06 |         |
| 01905270           | PROPRANOLOL HYDROCHLORIDE (++) | 100122-02 | F10      | sample         | 318-98-9, 925-66-6            | C16H21ClNO2     | 285.23426  | antibacterial, antitussive, antitachycardic           | USP, INN, BAN, JAN                    | synthetic                  |                                                      | -1.21                  | -1.94 | -0.07 | 0.44  | -0.69 |         |
| 01904001           | METHSCOPOLAMINE BROMIDE        | 100122-02 | F11      | sample         | 155-41-9                      | C18H24BrNO4     | 398.30025  | anticholinergic                                       | USP, XXII, BAN, JAN                   | semisynthetic              |                                                      | 0.37                   | 0.13  | -0.02 | 0.35  | -0.23 |         |
| 0.04% DMSO         |                                | 100122-02 | F12      | 0.04% dms0     |                               |                 |            |                                                       |                                       |                            |                                                      | -1.24                  | -0.53 | -0.77 | -0.63 | -0.41 |         |
| 0.04% JAK2inhb     |                                | 100122-02 | G01      | 0.04% jak2inhb |                               |                 |            |                                                       |                                       |                            |                                                      | -1.56                  | -2.11 | -2.34 | -4.22 | -2.56 |         |
| 02300219           | EDROPHONIUM CHLORIDE           | 100122-02 | G02      | sample         | 116-38-1, 312-48-1            | C10H16ClNO      | 201.68912  | acetylcholinesterase inhibitor                        | USP, INN, BAN, JAN                    | synthetic                  |                                                      | -0.04                  | 0.39  | -0.04 | 0.10  | 0.50  |         |
| 01900005           | THIOFENTAL SODIUM              | 100122-02 | G03      | sample         | 71-73-8, 76-75-5 [thiopental] | C11H7N2NaO2S    | 264.32414  | anesthetic                                            | USP, INN, BAN, JAN                    | synthetic                  |                                                      | 1.12                   | 0.56  | 0.95  | -0.60 | 0.51  |         |
| 02300061           | CLUMPRAMINE HYDROCHLORIDE      | 100122-02 | G04      | sample         | 17321-77-6, 303-49-1          | C18H24ClN2      | 351.32253  | antidepressant                                        | USP, INN, BAN, JAN                    | synthetic                  |                                                      | 0.68                   | -0.14 | -0.12 | -0.81 | -0.10 |         |
| 01909853           | PHENORFANOL HYDROCHLORIDE      | 100122-02 | G05      | sample         | 834-28-2                      | C11H15ClNO      | 241.17263  | antibacterial                                         | USP, XX, INN, BAN                     | synthetic                  |                                                      | 0.25                   | -0.52 | -0.28 | 0.57  | 0.46  |         |
| 01905691           | PEMPERIDINE                    | 100122-02 | G06      | sample         | 26864-56-2                    | C28H27ClFN3O    | 523.99407  | anticholinergic                                       | USAN, INN, BAN                        | synthetic                  | JACS 81:2220 (1959); Ann Pharmacother 27:1183 (1993) | 0.67                   | 4.88  | 0.43  | 0.04  | 1.51  |         |
| 02300009           | TILORONE                       | 100122-02 | G07      | sample         | 27591-69-1, 27591-07-9        | C25H34N2O3      | 410.56133  | antiviral                                             | USAN, INN                             | synthetic                  |                                                      | -0.92                  | 0.36  | 2.22  | 0.11  | 0.44  |         |
| 01905672           | VINCORISTINE SULFATE           | 100122-02 | G08      | sample         | 2068-78-2                     | C46H68N4O14S    | 925.05786  | antidepressant                                        | USP, INN, BAN, JAN                    | synthetic                  | Int Pharmacodyn Ther 157:299 (1965)                  | 0.37                   | 0.82  | -0.24 | 1.59  | 0.63  |         |
| 01905693           | ONEPRACIN                      | 100122-02 | G09      | sample         | 73500-48-6                    | C17H19N3O5S     | 345.45638  | antibacterial, gastric acid depressant                | USP, INN, BAN                         | synthetic                  | H-16888                                              | 0.90                   | -0.16 | 0.41  | 0.50  | 0.21  |         |
| 01905281           | ZOLMITRIPTAN                   | 100122-02 | G10      | sample         | 130264-17-8                   | C16H21N3O2      | 287.36467  | antimigraine, 5HT1B/1D1 agonist                       | USAN, INN, BAN                        | synthetic                  |                                                      | 1.57                   | -0.08 | -0.01 | -0.20 | 0.04  |         |
| 01905686           | DEBRISOXONE SULFATE            | 100122-02 | G11      | sample         | 581-88-4                      | C15H15N3O4S     | 373.31275  | anti-hypertensive                                     | USAN, INN, BAN                        | synthetic                  | RO-5-3307/1                                          | 0.32                   | 0.08  | -0.02 | 0.97  | 0.34  |         |
| 0.04% DMSO         |                                | 100122-02 | G12      | 0.04% dms0     |                               |                 |            |                                                       |                                       |                            |                                                      | -0.12                  | -0.49 | -0.34 | 0.69  | 0.18  |         |
| 0.04% JAK2inhb     |                                | 100122-02 | H01      | 0.04% jak2inhb |                               |                 |            |                                                       |                                       |                            |                                                      | -0.51                  | -1.94 | -0.86 | -3.65 | -1.74 |         |
| 01906086           | SULFADOXINE                    | 100122-02 | H02      | sample         | 2447-57-6                     | C12H14N4NaO4S   | 310.33378  | antibacterial                                         | USP, INN, BAN, JAN                    | synthetic                  | RO-4-4393                                            | 0.51                   | 0.28  | -0.69 | 3.03  | 0.78  |         |
| 01905069           | FINASTERIDE                    | 100122-02 | H03      | sample         | 98319-26-7                    | C23H36N2O2      | 372.55557  | anti-androgen, alpha-reductase inhibitor              | USP, INN, BAN                         | synthetic                  | MD-909                                               | 0.83                   | 1.64  | 0.08  | -0.88 | 0.42  |         |
| 01906082           | PENTETIC ACID                  | 100122-02 | H04      | sample         | 67-43-4                       | C14H23N3O10     | 353.35351  | chelating agent, diagnostic aid                       | USP, INN, BAN                         | synthetic                  | DTPA                                                 | 0.67                   | 0.74  | 0.81  | 0.70  | 0.21  |         |
| 01906084           | PROSCILLARIN                   | 100122-02 | H05      | sample         | 466-06-8                      | C28H40O9        | 532.68573  | cardiotonic                                           | USAN, INN, BAN, JAN                   | synthetic                  | Scilla spp. A-32686, 2936                            | 0.89                   | 1.08  | -0.36 | -0.26 | 0.34  |         |
| 01905438           | HYDROCORTISONE VALERATE        | 100122-02 | H06      | sample         | 57524-69-7                    | C28H38O6        | 446.58916  | antiinflammatory, glucocorticoid                      | USP                                   |                            |                                                      | 0.17                   | 0.03  | 2.97  | -1.28 | 0.47  |         |
| 01906035           | REPAGLINIDE                    | 100122-02 | H07      | sample         | 138023-12-1                   | C27H38NO2       | 427.58897  | antidiabetic                                          | USP, INN, BAN                         | synthetic                  | Repaglinide AG-EE-623-ZW                             | 0.49                   | 0.08  | 0.08  | -0.33 | 0.20  |         |
| 01905271           | CROTAMITOL                     | 100122-02 | H08      | sample         | 483-63-6                      | C13H17NO        | 220.28654  | antipruritic, scabicide                               | USP, INN, BAN, JAN                    | synthetic                  |                                                      | -0.57                  | -0.40 | -0.18 | -0.68 | -0.46 |         |
| 01905364           | CEPROFOL                       | 100122-02 | H09      | sample         | 11213-17-9                    | C18H19N3O5S     | 389.43324  | antibacterial                                         | USP, INN, BAN                         | semisynthetic              | BMV-2810-03-800                                      | 0.33                   | -0.11 | -1.23 | 0.88  | -0.04 |         |
| 01905384           | METHYLDOPATE HYDROCHLORIDE     | 100122-02 | H10      | sample         | 2509-79-0                     | C10H15NO2       | 175.24582  | antihypertensive                                      | USP, BAN                              | synthetic                  |                                                      | -0.13                  | -0.26 | -0.50 | -0.71 | -0.14 |         |
| 01905145           | SULFAQUINOXALINE SODIUM        | 100122-02 | H11      | sample         | 59-40-5                       | C14H14N4NaO2S   | 322.32317  | antibacterial                                         | USP, INN, BAN                         | synthetic                  |                                                      | -1.55                  | -1.   |       |       |       |         |

|          |                                |           |     |               |                               |                 |            |                                                                  |                                                       |                       |                                                         | Screen Score (z-score) |       |       |       |         |
|----------|--------------------------------|-----------|-----|---------------|-------------------------------|-----------------|------------|------------------------------------------------------------------|-------------------------------------------------------|-----------------------|---------------------------------------------------------|------------------------|-------|-------|-------|---------|
|          |                                |           |     |               |                               |                 |            |                                                                  |                                                       |                       |                                                         | rep1                   | rep2  | rep3  | rep4  | Average |
| 01050366 | RANOLAZINE                     | 100122-03 | F02 | sample        | 95635-55-5                    | C24H33N3O4      | 427.54831  | antiangiatic, antischemic                                        | synthetic; RS-43285-003; CVT-303                      | USAN, INN             |                                                         | 0.48                   | 2.49  | 2.73  | 0.54  | 1.56    |
| 00211468 | DANTHRON                       | 100122-03 | F03 | sample        | 117-10-2                      | C14H8O4         | 240.21746  | cathartic                                                        | USP-XXI; Rheum palmatum, Xylis semifuscata            | USAN, INN, BAN        | JACS 53: 4112 (1931)                                    | -0.23                  | -0.02 | -0.94 | -0.91 | -0.07   |
| 00042385 | ACEDAPSONE                     | 100122-03 | F04 | sample        | 77-46-3                       | C18H18N2O4S     | 332.38002  | antimicrobial, leprostatic                                       | synthetic; CI-566, CN-183, DADDOS, PAM-MAR-1165       | USAN, INN, BAN        |                                                         | -0.23                  | 0.90  | -0.29 | 0.32  | 0.09    |
| 01050385 | ATOMOXETINE HYDROCHLORIDE      | 100122-03 | F05 | sample        | 100122-03                     | C16H20ClN2      | 277.7660   | noradrenergic reuptake inhibitor                                 | C16H20ClN2; LY-136053                                 | USAN, INN, BAN        |                                                         | 0.29                   | 0.48  | -0.09 | -0.37 | 1.09    |
| 00300029 | DESORYCORTICOSTERONE ACETATE   | 100122-03 | F06 | sample        | 56-47-3                       | C23H32O5        | 372.50909  | mineralocorticoid                                                | adrenocortex                                          | USP, INN, BAN         |                                                         | 0.96                   | -0.68 | 2.04  | -0.13 | 0.55    |
| 01050389 | TRAMADOL HYDROCHLORIDE         | 100122-03 | F07 | sample        | 36282-47-0                    | C18H26ClNO2     | 299.84412  | analgesic                                                        | synthetic; U-26225A, CG-315E                          | USAN, INN, BAN, JAN   |                                                         | 0.41                   | -0.32 | 0.46  | 0.30  | 0.21    |
| 01050392 | TERBINAFIN HYDROCHLORIDE       | 100122-03 | F08 | sample        | 78628-90-5, 91161-71-6(base)  | C12H16ClN2      | 227.80107  | antifungal                                                       | synthetic; SF-86327                                   | USAN, INN, BAN        |                                                         | 0.14                   | -0.01 | 0.14  | -0.01 | 0.21    |
| 01050801 | TOPIRAMATE                     | 100122-03 | F09 | sample        | 97240-79-4                    | C12H21NO8S      | 339.36707  | anticonvulsant, antimigraine, GABA-A agonist, AMP/kinase         | synthetic; RWJ-17021                                  | USAN, INN, BAN        |                                                         | -1.08                  | -1.21 | 1.16  | 0.86  | 0.18    |
| 01050802 | GEMFLOXACIN MESYLATE           | 100122-03 | F10 | sample        | 204519-65-3                   | C19H24FN5O7S    | 485.49483  | antibacterial                                                    | synthetic                                             | USAN                  |                                                         | -6.80                  | 0.30  | 1.20  | 0.09  | -1.30   |
| 01050903 | PRASARTIN SODIUM               | 100122-03 | F11 | sample        | 81131-70-6                    | C23H35NaO7      | 446.521    | antihypertidiemic, HMGCoA reductase inhibitor                    | CS-514; SQ-31000                                      | USAN, INN, BAN, JAN   |                                                         | -1.60                  | -0.45 | 0.38  | -1.35 | -0.75   |
| 01050903 | 0.04% DMSO                     | 100122-03 | F12 | 0.04% dms0    |                               |                 |            |                                                                  |                                                       |                       |                                                         | 0.24                   | -0.77 | 0.53  | 0.20  | 0.55    |
|          |                                | 100122-03 | G01 | 0.04% jak2nhb |                               |                 |            |                                                                  |                                                       |                       |                                                         | -0.96                  | 2.50  | 0.95  | -1.25 | 0.31    |
| 01050811 | LEVABUTEROL HYDROCHLORIDE      | 100122-03 | G02 | sample        | 50293-90-8                    | C13H22ClNO3     | 275.77819  | bronchodilator, tocolytic                                        | synthetic                                             | USAN                  |                                                         | -0.32                  | 0.29  | -0.94 | 0.84  | -0.03   |
| 01050814 | METFORMIN HYDROCHLORIDE        | 100122-03 | G03 | sample        | 1115-70-4, 567-24-            | C4H11ClNO2      | 165.62674  | antidiabetic                                                     | synthetic; LA-6023                                    | USAN, JAN             |                                                         | 1.03                   | 1.32  | -0.31 | -0.78 | 0.71    |
| 01050816 | PREGABALIN                     | 100122-03 | G04 | sample        | 148553-50-8                   | C8H17NO2        | 159.23019  | anticonvulsant                                                   | synthetic; CI-1008                                    | USAN, INN             |                                                         | -0.12                  | 0.64  | -0.85 | 0.60  | 0.13    |
| 02001706 | TOPOTECAN HYDROCHLORIDE        | 100122-03 | G05 | sample        | 119413-54-6                   | C23H24ClN3O5    | 457.91783  | antineoplastic, topoisomerase I inhibitor                        | semisynthetic                                         | USAN, INN, BAN        |                                                         | -0.17                  | 0.10  | -0.39 | 0.15  | 0.24    |
| 02001706 | PHENOLYBENZAMINE HYDROCHLORIDE | 100122-03 | G06 | sample        | 63-62-3, 59-86-1              | C18H22ClNO2     | 340.29611  | alpha adrenergic blocker                                         | synthetic                                             | USP                   |                                                         | -0.41                  | 0.55  | -0.14 | -0.13 | -0.03   |
| 02002707 | PRACIDIL                       | 100122-03 | G07 | sample        | 8371-44-8, 60560-33-0         | C13H18N6        | 245.32988  | K channel agonist, antihypertensive                              | synthetic                                             | USAN, INN             |                                                         | -0.31                  | -0.04 | -0.18 | -0.10 | -0.26   |
| 02003027 | VERAPAMIL HYDROCHLORIDE        | 100122-03 | G08 | sample        | 152-11-4, 82-53-9 [verapamil] | C27H38ClNO4     | 491.07588  | adenosine blocker, Ca channel blocker, coronary vasodilator      | synthetic                                             | USP, INN, BAN, JAN    |                                                         | -0.12                  | -0.30 | -0.14 | -0.14 | -0.10   |
| 01050818 | PANTOPRAZOLE                   | 100122-03 | G09 | sample        | 102629-53-0                   | C16H15FN3O4S    | 383.75493  | proton pump inhibitor, gastric acid release inhibitor, antitumor | synthetic; SK&F-96022, BY-1023                        | USAN, INN, BAN        |                                                         | -0.07                  | -0.03 | 0.49  | 1.93  | 0.58    |
| 02000241 | LOPERAMIDE HYDROCHLORIDE       | 100122-03 | G10 | sample        | 34562-84-5, 53179-11-6        | C29H42ClNO2     | 511.51293  | Ca channel blocker                                               | synthetic                                             | USAN, INN, BAN, JAN   |                                                         | -1.89                  | -0.56 | -5.80 | 1.54  | -0.32   |
| 02003032 | PODOFLOXIN                     | 100122-03 | G11 | sample        | 518-28-5                      | C22H22O8        | 414.41584  | antineoplastic, inhibits microtubule assembly, and human DNA     | Podophyllum peltatum; podophyllotoxin                 | USAN, BAN             | JACS 73: 2909 (1951); 75: 1308 (1953); J Med Chem 32:   | -10.56                 | -6.56 | -5.80 | -3.21 | -6.53   |
| 01050903 | 0.04% DMSO                     | 100122-03 | G12 | 0.04% dms0    |                               |                 |            |                                                                  |                                                       |                       |                                                         | -0.10                  | 5.78  | 0.17  | 5.24  | 2.77    |
|          |                                | 100122-03 | H01 | 0.04% jak2nhb |                               |                 |            |                                                                  |                                                       |                       |                                                         | -1.89                  | -1.52 | -3.45 | -2.43 | -2.32   |
| 02002005 | ABVDOPRA                       | 100122-03 | H02 | sample        | 59-92-7                       | C9H11NO4        | 197.19232  | antiparkinsonian                                                 | Vicia faba seedlings, Sarothamnus spp. & other plants | USP, INN, BAN, JAN    |                                                         | -0.65                  | -0.17 | 1.13  | 0.30  | -0.41   |
| 00300607 | RUTOSIDE (rutin)               | 100122-03 | H03 | sample        | 153-18-4                      | C27H30O16       | 610.53055  | vascular protectant                                              | Ruta graveolens, widespread in plants                 | NF, XI, INN, BAN, JAN |                                                         | -0.43                  | 0.43  | 0.56  | -0.41 | 0.04    |
| 01050615 | ZOMEPRAC SODIUM                | 100122-03 | H04 | sample        | 64092-49-5, 94092-48-4        | C19H14ClN3O3    | 291.73673  | analgesic, antinflammatory                                       | synthetic                                             | USAN, INN, BAN        |                                                         | 0.05                   | 1.02  | -0.36 | 0.56  | 0.32    |
| 00300648 | SPARTINE SULFATE               | 100122-03 | H05 | sample        | 616-15-2, 289-39-8            | C19H29NO10S     | 432.48541  | cystic                                                           | Lupinus spp and other Leguminosae                     | USAN, INN, BAN        | J Chem Soc 1949: 663                                    | -0.16                  | 0.02  | -0.89 | -1.08 | -0.53   |
| 00300034 | TESTOSTERONE PROPIONATE        | 100122-03 | H06 | sample        | 58-20-2                       | C26H38O2        | 344.40854  | androgen, antineoplastic                                         | synthetic                                             | USAN, INN, BAN        |                                                         | 0.11                   | 0.76  | -0.10 | -0.76 | 0.00    |
| 01050609 | METHAMAZOLE                    | 100122-03 | H07 | sample        | 60-56-0                       | C4H8N2S         | 114.16982  | thyroid inhibitor                                                | synthetic                                             | USP, INN, BAN, JAN    |                                                         | -0.22                  | 1.72  | -0.45 | 5.54  | 1.65    |
| 01050607 | ENILCONAZOLE                   | 100122-03 | H08 | sample        | 35554-40-0                    | C18H14ClN2O2    | 297.18648  | antifungal                                                       | synthetic; R-23979                                    | USAN, INN, BAN        |                                                         | -0.37                  | -0.04 | -0.18 | -0.11 | -0.26   |
| 01050426 | FIROCOXIB                      | 100122-03 | H09 | sample        | 189954-96-9                   | C17H20O5S       | 336.40995  | analgesic, antinflammatory, antipyretic, COX-II inhibitor        | synthetic; ML-1785713                                 | USAN, INN             |                                                         | -0.51                  | 0.59  | 0.24  | -0.72 | 0.15    |
| 00330071 | LINDANE                        | 100122-03 | H10 | sample        | 58-89-9                       | C6H6Cl6         | 290.83272  | insecticide                                                      | synthetic; gamma-BHC                                  | USP, INN, BAN         | Use: insecticide                                        | -0.38                  | 0.74  | 0.01  | 0.78  | 1.04    |
| 01050421 | ACRISORCIN                     | 100122-03 | H11 | sample        | 7527-91-5                     | C23H28N2O2      | 388.51411  | antitumor                                                        | synthetic                                             | USP-XXII, INN         |                                                         | -0.05                  | -0.04 | 3.73  | -0.59 | 0.01    |
| 01050421 | empty                          | 100122-03 | H12 | sample        |                               |                 |            |                                                                  |                                                       |                       |                                                         | NA                     | NA    | NA    | NA    | NA      |
|          |                                | 100122-04 | A01 | sample        |                               |                 |            |                                                                  |                                                       |                       |                                                         | NA                     | NA    | NA    | NA    | NA      |
| 00300525 | PHENYLAMINOSALICYLATE          | 100122-04 | A02 | sample        | 133-11-9                      | C13H11NO3       | 229.23752  | antibacterial (tuberculostatic)                                  | synthetic; NSC-40144                                  | USAN, INN, BAN        |                                                         | -1.33                  | -1.12 | -1.72 | -0.52 | -1.17   |
| 00301024 | TESTOSTERONE                   | 100122-04 | A03 | sample        | 58-20-2                       | C19H28O2        | 288.43381  | androgen, male hormone                                           | synthetic                                             | USP, INN, BAN         |                                                         | -0.98                  | -1.04 | -0.24 | 0.04  | -0.58   |
| 00310035 | SANGUINARIUM SULFATE           | 100122-04 | A04 | sample        | 5578-73-4                     | C20H18NO8S      | 429.40845  | antineoplastic, antiplatelet agent                               | Sanguinaria canadensis                                | USAN, INN             | J Heterocyclic Chem 9: 1453 (1972)                      | -1.60                  | -1.52 | -2.51 | -1.83 | -1.86   |
| 00310039 | ALPHA-TOCOPHEROL               | 100122-04 | A05 | sample        | 59-02-9                       | C29H50O2        | 430.72085  | vitamin E                                                        | soya, wheat germ and other plant oils                 | USP                   |                                                         | -0.21                  | -0.91 | -0.81 | -1.66 | -0.90   |
| 00310040 | ALPHA-TOCOPHERYL ACETATE       | 100122-04 | A06 | sample        | 58-07-5                       | C31H54O2        | 472.75829  | vitamin E                                                        | derivative                                            | USP                   |                                                         | -0.23                  | 0.44  | -0.68 | -0.90 | -0.34   |
| 00330001 | DACTINOMYCIN                   | 100122-04 | A07 | sample        | 50-76-0                       | C26H28N12O16    | 1255.44752 | antineoplastic, intercalating agent                              | Actinomycetes spp                                     | USP, INN, BAN, JAN    |                                                         | -0.51                  | -0.51 | -0.64 | 1.26  | -1.25   |
| 00330002 | MITOMYCIN C                    | 100122-04 | A08 | sample        | 50-07-7                       | C18H18NO4S      | 334.33451  | antineoplastic                                                   | Streptomyces verticillatus                            | USP, INN, BAN, JAN    |                                                         | -1.03                  | -1.98 | -0.90 | -2.85 | -1.69   |
| 00330018 | DICHLOROVOS                    | 100122-04 | A09 | sample        | 62-73-7                       | C4H7Cl2O4P      | 220.97779  | insecticide, cholinesterase inhibitor                            | synthetic                                             | USAN, INN, BAN        |                                                         | -0.77                  | -1.84 | 2.03  | -0.48 | -0.26   |
| 00330002 | TEMEOFOS                       | 100122-04 | A10 | sample        | 3385-98-8                     | C16H20ClNO2P2S3 | 466.4738   | insecticide                                                      | C16H20ClNO2P2S3                                       | USAN, INN             |                                                         | -1.23                  | -1.77 | 0.59  | -1.24 | -1.11   |
| 00330082 | MITOTANE                       | 100122-04 | A11 | sample        | 53-19-0                       | C14H10Cl4       | 320.0748   | insecticide, antineoplastic                                      | synthetic                                             | USP, BAN, JAN         |                                                         | -0.32                  | -2.23 | 0.04  | -1.84 | -1.09   |
| 01050903 | 0.04% JAK2nhb                  | 100122-04 | A12 | 0.04% jak2nhb |                               |                 |            |                                                                  |                                                       |                       |                                                         | -2.29                  | -2.40 | -0.72 | -2.99 | -2.01   |
|          |                                | 100122-04 | B01 | 0.04% dms0    |                               |                 |            |                                                                  |                                                       |                       |                                                         | -0.98                  | -0.24 | -0.88 | 4.77  | 0.67    |
| 01300027 | IVERMECTIN                     | 100122-04 | B02 | sample        | 70288-86-7                    | C48H74O14       | 875.11658  | antiparasitic                                                    | semisynthetic                                         | USP, INN, BAN         | Science 221:823 (1983); J Vet Pharmacol Ther 7:1 (1984) | -2.09                  | -4.82 | -3.73 | -2.40 | -5.01   |
| 01300037 | SODIUM TRIOXIPROSIDE           | 100122-04 | B03 | sample        | 13755-58-9                    | C5F6H8Na2O      | 261.92195  | antihypertensive                                                 | synthetic                                             | USP                   | J Clin Pharmacol 14:494 (1974)                          | -3.52                  | -3.51 | -3.55 | -2.58 | -3.29   |
| 01300038 | SODIUM OXYBATE                 | 100122-04 | B04 | sample        | 502-85-2                      | C4H7NaO3        | 126.08389  | anesthetic                                                       | synthetic; WY-3478, NSC-84223                         | USAN                  |                                                         | 0.16                   | 2.78  | -1.47 | -1.12 | 0.09    |
| 01400151 | ETHYL PARABEN                  | 100122-04 | B05 | sample        | 120-47-8                      | C9H10O3         | 166.17625  | antifungal                                                       | USAN; NF, JAN                                         | USAN, NF, JAN         |                                                         | -4.52                  | -4.48 | 4.52  | 0.02  | 0.76    |
| 01400208 | COMARIN                        | 100122-04 | B06 | sample        | 91-64-5                       | C9H8O2          | 146.14697  | antineoplastic, antinflammatory, antiperglycemic                 | Coumarouna odorata, tonka beans, lavender oil         | NF-X, INN             | Prog Chem Org Nat Prod 9: 225 (1952)                    | -0.09                  | -0.41 | -0.65 | -0.93 | -0.47   |
| 01050101 | ACETAMINOPHEN                  | 100122-04 | B07 | sample        |                               |                 |            |                                                                  |                                                       |                       |                                                         |                        |       |       |       |         |

|             |                                |           |          |                |                                |                   |            |                                                                       |                                                          |                     |                                                       | Screen Score (z-score)                     |       |       |       |         |      |
|-------------|--------------------------------|-----------|----------|----------------|--------------------------------|-------------------|------------|-----------------------------------------------------------------------|----------------------------------------------------------|---------------------|-------------------------------------------------------|--------------------------------------------|-------|-------|-------|---------|------|
| Compound ID | MoNAme                         | plate     | position | Content        | cas#                           | Formula           | MoWT       | Bioactivity                                                           | Source                                                   | Status              | Reference                                             | rep1                                       | rep2  | rep3  | rep4  | Average |      |
| 01500179    | CHLOROQUINE DIPHOSPHATE        | 100122-04 | H10      | sample         | 54-05-7                        | C18H32ClN3O8P2    | 515.87164  | antimalarial, antiamebic, antirheumatic, intercalating agent          | synthetic                                                | USP, BAN            |                                                       | 0.80                                       | -0.23 | 2.12  | -0.10 | 0.65    |      |
| 01500180    | CHLOROTHIAZIDE                 | 100122-04 | H11      | sample         | 58-94-6                        | C7H6ClN3O4S2      | 295.72457  | diuretic, antihypertensive                                            | synthetic                                                | USP, INN, BAN       |                                                       | 2.17                                       | 0.30  | 0.53  | 0.29  | 0.82    |      |
|             | empty                          | 100122-04 | H12      | sample         |                                |                   |            |                                                                       |                                                          |                     |                                                       | NA                                         | NA    | NA    | NA    | NA      |      |
| 01500181    | CHLOROTRIANISENE               | 100122-05 | A01      | sample         | 569-57-3                       | C23H21ClO3        | 380.87502  | estrogen                                                              | synthetic                                                | USP-XII, INN, BAN   |                                                       | -0.41                                      | -0.50 | -1.51 | 0.16  | -0.56   |      |
| 01500182    | CHLOROXYLENOL                  | 100122-05 | A03      | sample         | 88-04-0                        | C8H9ClO           | 156.61333  | antibacterial, topical and urinary antiseptic                         | synthetic                                                | USP, INN, BAN       |                                                       | 0.02                                       | -0.53 | -1.26 | 0.39  | -0.35   |      |
| 01500183    | CHLORPHENIRAMINE (S) MALEATE   | 100122-05 | A04      | sample         | 113-42-8, 132-22-9             | C20H23ClN2O4      | 390.87031  | antihistemic                                                          | synthetic                                                | USP, INN, BAN       |                                                       | -0.82                                      | -0.44 | 0.35  | -0.67 | -0.39   |      |
| 01500184    | CHLORPROPAMIDE                 | 100122-05 | A05      | sample         | 50-53-3                        | C17H19ClN2S       | 318.71738  | antiemetic, antipsychotic                                             | synthetic                                                | USP, INN, BAN, JAN  |                                                       | -0.05                                      | 2.54  | -0.76 | -0.11 | 0.41    |      |
| 01500185    | CHLORPROPAMIDE                 | 100122-05 | A06      | sample         | 94-20-2                        | C10H13ClN2O3S     | 276.74371  | antidiabetic                                                          | synthetic                                                | USP, INN, BAN, JAN  |                                                       | -0.05                                      | -0.97 | 0.28  | 0.21  | -0.11   |      |
| 01500186    | CHLORTRACYCLINE HYDROCHLORIDE  | 100122-05 | A07      | sample         | 64-72-2                        | C22H42Cl2N2O8     | 153.35115  | antibacterial, antiamebic, Ca chelator, hepatotoxic; inhibits protein | Streptomyces aureofaciens                                | USP, BAN            | Ann NY Acad Sci 51: 177 (1948); JACS 74: 4976 (1952); | -0.05                                      | -0.82 | -0.43 | -0.03 | -0.31   |      |
| 01500187    | CHLORTHALIDONE                 | 100122-05 | A08      | sample         | 77-36-1                        | C14H11ClN2O4S     | 338.71717  | diuretic, antihypertensive                                            | synthetic                                                | USP, INN, BAN, JAN  |                                                       | -0.40                                      | -0.52 | -0.12 | -0.10 | -0.36   |      |
| 01500188    | CHLOROAZOXONE                  | 100122-05 | A09      | sample         | 95-25-0                        | C17H17ClN2O2      | 169.58843  | muscle relaxant (skeletal)                                            | synthetic                                                | USP, INN, BAN, JAN  |                                                       | -0.05                                      | -0.14 | 0.77  | 0.69  | 0.23    |      |
| 01500189    | CYCLOPROX OLAMINE              | 100122-05 | A10      | sample         | 41621-49-2                     | C14H24N2O5        | 268.35898  | antifungal                                                            | synthetic                                                | USP, INN, BAN       |                                                       | -0.99                                      | -1.94 | -0.32 | -0.57 | -0.95   |      |
| 01500190    | CINOXACIN                      | 100122-05 | A11      | sample         | 28657-60-9                     | C12H18N2O5        | 262.2239   | antibacterial                                                         | synthetic                                                | USP, INN, BAN, JAN  |                                                       | -0.30                                      | -0.88 | 0.04  | -0.50 | -0.34   |      |
|             | 0.04% JAK2nhib                 | 100122-05 | A12      | 0.04% jak2nhib |                                |                   |            |                                                                       |                                                          |                     |                                                       | -1.16                                      | -1.31 | -0.18 | -1.85 | -1.12   |      |
|             | 0.04% DMSO                     | 100122-05 | B01      | 0.04% dmso     |                                |                   |            |                                                                       |                                                          |                     |                                                       | 0.35                                       | 0.24  | -1.29 | -0.20 | -0.23   |      |
| 01500191    | CLEMASTINE                     | 100122-05 | B02      | sample         | 15686-51-8                     | C25H33ClN2O5      | 459.97455  | antihistaminic                                                        | synthetic                                                | USAN, BAN           |                                                       | -0.44                                      | -0.27 | -0.67 | -0.25 | -0.41   |      |
| 01500192    | CLINDINIL BROMIDE              | 100122-05 | B03      | sample         | 3485-02-8                      | C22H28BrN3O3      | 432.31412  | anticholinergic                                                       | synthetic                                                | USP, INN, BAN       |                                                       | 0.29                                       | 0.14  | -0.10 | 0.06  | 0.10    |      |
| 01500193    | CLINDAMYCIN HYDROCHLORIDE      | 100122-05 | B04      | sample         | 21462-39-5, 58207-19-5         | C18H34Cl2N2O5S    | 461.45208  | antibacterial, inhibits protein synthesis                             | synthetic                                                | USAN, INN, BAN      |                                                       | -0.24                                      | 0.37  | 3.90  | -0.38 | 0.91    |      |
| 01500196    | CLONIPHENE CITRATE             | 100122-05 | B05      | sample         | 50-41-9, 911-45-5 [clomiphen]  | C18H36ClN2O8      | 598.09802  | gonad stimulating protein                                             | synthetic                                                | USP, INN, BAN       |                                                       | -0.70                                      | -0.72 | -0.01 | 0.50  | -0.23   |      |
| 01500198    | CLONIDINE HYDROCHLORIDE        | 100122-05 | B06      | sample         | 4205-91-8, 4205-90-7           | C9H10Cl2N2        | 266.55915  | antihypertensive                                                      | synthetic                                                | USP, INN, BAN       |                                                       | 0.17                                       | -0.47 | 0.59  | 1.54  | 0.58    |      |
| 01500200    | CLOTIMAZOLE                    | 100122-05 | B07      | sample         | 23593-75-1                     | C22H17ClN2        | 344.84719  | antifungal                                                            | synthetic                                                | USP, INN, BAN, JAN  |                                                       | -1.49                                      | -1.42 | -0.98 | -2.76 | -1.66   |      |
| 01500201    | CLOXACILLIN SODIUM             | 100122-05 | B08      | sample         | 7081-44-9, 642-78-4            | C18H17ClN3NaO5S   | 457.87124  | antibacterial                                                         | semisynthetic                                            | USP, INN, BAN, JAN  |                                                       | -0.58                                      | 0.55  | 0.32  | 1.29  | 0.40    |      |
| 01500202    | CLOXYQUIN                      | 100122-05 | B09      | sample         | 130-16-5                       | C9H6ClN2O         | 179.60727  | antibacterial, antifungal                                             | USAN, INN                                                |                     |                                                       | 0.69                                       | 0.54  | 0.39  | 0.26  | 0.47    |      |
| 01500205    | COLCHICINE                     | 100122-05 | B10      | sample         | 64-86-8                        | C22H25NO6         | 399.44765  | antimitotic, antitumor agent                                          | Colchicum autumnale                                      | USP, JAN            | J Am Chem Soc 74: 487 (1952)                          | -0.88                                      | -0.74 | -7.62 | -7.13 | -7.67   |      |
| 01500206    | COLISTIMETHATE SODIUM          | 100122-05 | B11      | sample         | 8068-28-8, 21362-08-3          | C57H103N16NaO5S2S | 1735.81586 | antibiotic                                                            | Bacillus colistinus                                      | USP, INN, BAN, JAN  |                                                       | Brit.J Pharmacol.Chemother. 23: 552 (1964) | 1.37  | 1.30  | 0.56  | 3.01    | 1.13 |
|             | 0.04% JAK2nhib                 | 100122-05 | B12      | 0.04% jak2nhib |                                |                   |            |                                                                       |                                                          |                     |                                                       | -0.82                                      | -2.31 | 0.33  | -1.12 | -0.98   |      |
|             | 0.04% DMSO                     | 100122-05 | C01      | 0.04% dmso     |                                |                   |            |                                                                       |                                                          |                     |                                                       | -0.37                                      | -0.33 | -0.66 | -0.33 | -1.31   |      |
| 01500207    | CORTISONE ACETATE              | 100122-05 | C02      | sample         | 50-04-4, 53-06-5 [cortisone]   | C23H36O6          | 402.49195  | glucocorticoid                                                        | semisynthetic                                            | USP, INN, BAN, JAN  |                                                       | 0.50                                       | 0.46  | -0.66 | -0.40 | 1.17    |      |
| 01500208    | COTININE                       | 100122-05 | C03      | sample         | 486-56-6, 5695-98-7 [tumarate] | C10H12N2O         | 176.21994  | antidepressant                                                        | Nicotiana tabacum                                        | USAN, INN           | JACS 79: 149 (1957)                                   | 0.66                                       | 0.53  | -0.76 | 0.77  | 0.30    |      |
| 01500209    | CRESOL                         | 100122-05 | C04      | sample         | 1319-77-3                      | C7H8O             | 108.14121  | antifeedant                                                           | coal tar                                                 | USAN, NE, JAN       |                                                       | 0.51                                       | 1.22  | 5.55  | 2.79  | 2.49    |      |
| 01500210    | CHROMOLYN SODIUM               | 100122-05 | C05      | sample         | 15826-37-6, 16110-51-3         | C23H41NaO11       | 512.34103  | asthmatic, antallergy                                                 | synthetic                                                | USP, INN, BAN, JAN  |                                                       |                                            | 0.17  | 0.73  | 0.01  | 0.49    | 0.36 |
| 01500211    | CYCLOZINE                      | 100122-05 | C06      | sample         | 82-62-8                        | C18H22N2          | 266.39944  | H1 antihistamine                                                      | synthetic                                                | USP, BAN            |                                                       | 0.55                                       | 1.48  | 0.08  | 2.89  | 1.25    |      |
| 01500212    | CYCLOPENTOLONE HYDROCHLORIDE   | 100122-05 | C07      | sample         | 5870-29-1, 512-15-2            | C17H26ClN3O3      | 327.85487  | mydriatic                                                             | synthetic                                                | USP, INN, BAN, JAN  |                                                       |                                            | 0.06  | -0.42 | -0.02 | 0.82    | 0.21 |
| 01500213    | CYCLOPHOSPHAMIDE HYDRATE       | 100122-05 | C08      | sample         | 6055-19-2, 50-18-0             | C7H17Cl2N2O3P     | 279.10484  | antineoplastic, alkylating agent                                      | synthetic                                                | USP, INN, BAN, JAN  |                                                       | 0.86                                       | -0.20 | -0.32 | 0.18  | 0.13    |      |
| 01500215    | CYCLOSERINE                    | 100122-05 | C09      | sample         | 68-41-7                        | C3H6N2O2          | 102.09347  | antibacterial (tuberculostatic)                                       | Streptomyces spp                                         | USP, INN, BAN, JAN  |                                                       | 1.76                                       | -0.42 | 0.07  | 1.40  | 0.70    |      |
| 01500216    | CYPROTERONE ACETATE            | 100122-05 | C10      | sample         | 427-51-0                       | C24H29ClO4        | 416.94933  | antibacterial                                                         | USP                                                      |                     |                                                       | 0.16                                       | 0.60  | 0.79  | -0.34 | 0.30    |      |
| 01500217    | CYTARABINE                     | 100122-05 | C11      | sample         | 147-94-4                       | C9H13N3O5         | 243.22106  | antineoplastic, antiviral, antimetabolite                             | USP                                                      | USP, INN, BAN, JAN  |                                                       | -0.57                                      | -1.88 | -1.41 | -1.86 | -1.43   |      |
|             | 0.11% JAK2nhib                 | 100122-05 | C12      | 0.11% jak2nhib |                                |                   |            |                                                                       |                                                          |                     |                                                       | -1.78                                      | -2.41 | -1.01 | -1.61 | -1.70   |      |
|             | 0.11% DMSO                     | 100122-05 | D01      | 0.11% dmso     |                                |                   |            |                                                                       |                                                          |                     |                                                       | -0.38                                      | 0.29  | -0.78 | -1.49 | -0.59   |      |
| 01500218    | DACARBAZINE                    | 100122-05 | D02      | sample         | 4342-03-4                      | C6H10N6O          | 182.1892   | antineoplastic                                                        | synthetic                                                | USP, INN, BAN, JAN  |                                                       | 0.13                                       | -0.11 | -0.39 | 0.43  | 0.01    |      |
| 01500220    | DANAZOL                        | 100122-05 | D03      | sample         | 17230-88-5                     | C22H27N3O2        | 337.46599  | anti-ovarian pituitary suppressant                                    | synthetic                                                | USP, INN, BAN, JAN  |                                                       | 0.71                                       | -0.71 | 1.61  | -0.41 | 0.30    |      |
| 01500222    | DAPSONE                        | 100122-05 | D04      | sample         | 80-08-0                        | C12H11N2O2S2      | 248.30564  | antibacterial, leprostatic, dermatitis herpetiformis suppressant      | synthetic                                                | USP, INN, BAN       |                                                       | 1.20                                       | 0.29  | -0.38 | 0.23  | 0.41    |      |
| 01500223    | DAUNORUBICIN                   | 100122-05 | D05      | sample         | 20830-81-3                     | C27H29NO10        | 527.52588  | antineoplastic                                                        | Streptomyces peucetius; FI-6339, NDC-0082-4155, RP-13057 | USAN, INN, BAN, JAN |                                                       | -8.14                                      | -7.08 | -5.60 | -2.35 | -5.79   |      |
| 01500225    | SODIUM DEHYDROCHOLATE          | 100122-05 | D06      | sample         | 145-41-1                       | C24H33NaO5        | 451.51741  | cholestatic                                                           | semisynthetic                                            | USP, INN, BAN, JAN  |                                                       | 0.36                                       | 1.11  | 0.26  | 0.50  | 0.56    |      |
| 01500226    | DEMECLOXYCLINE HYDROCHLORIDE   | 100122-05 | D07      | sample         | 127-33-3                       | C21H32Cl2N2O8     | 501.32409  | antibacterial                                                         | Streptomyces aureofaciens                                | USP, BAN, JAN       |                                                       | 0.27                                       | 0.49  | 0.75  | 0.65  | 1.07    |      |
| 01500227    | DESIPRAMINE HYDROCHLORIDE      | 100122-05 | D08      | sample         | 58-28-6, 50-47-5 [desipramine] | C18H23ClN2        | 302.89041  | antidepressant                                                        | synthetic                                                | USP, INN, BAN, JAN  |                                                       | -0.27                                      | 0.02  | -0.26 | 1.89  | 0.29    |      |
| 01500229    | DEXAMETHASONE                  | 100122-05 | D09      | sample         | 50-02-6                        | C22H29FO5         | 392.47183  | glucocorticoid                                                        | synthetic                                                | USP, INN, BAN, JAN  |                                                       | 0.22                                       | 0.37  | 0.14  | 5.68  | 1.61    |      |
| 01500231    | DEXAMETHASONE ACETATE          | 100122-05 | D10      | sample         | 55812-90-3, 1177-87-3          | C24H31FO6         | 434.50497  | glucocorticoid, antiinflammatory                                      | semisynthetic                                            | USP, INN, BAN, JAN  |                                                       | 0.41                                       | 0.35  | 0.54  | -0.60 | 0.37    |      |
| 01500224    | DEFEROXAMINE MESYLATE          | 100122-05 | D11      | sample         | 138-14-7, 70-51-9              | C26H52N6O11S      | 656.80194  | chelating agent (Fe & Al)                                             | Streptomyces pilosus                                     | USAN, INN, BAN      |                                                       | 1.23                                       | 0.75  | 0.33  | -0.41 | 0.47    |      |
|             | 0.11% JAK2nhib                 | 100122-05 | D12      | 0.11% jak2nhib |                                |                   |            |                                                                       |                                                          |                     |                                                       | -3.78                                      | -2.78 | -3.01 | 1.96  | -1.90   |      |
|             | 0.11% JAK2nhib                 | 100122-05 | E01      | 0.11% jak2nhib |                                |                   |            |                                                                       |                                                          |                     |                                                       | -0.11                                      | -0.24 | -0.04 | -2.14 | -2.75   |      |
| 01500232    | DEXAMETHASONE SODIUM PHOSPHATE | 100122-05 | E02      | sample         | 2392-34-4, 312-93-6            | C22H28FNa2O8P     | 516.41546  | glucocorticoid, antiinflammatory                                      | semisynthetic                                            | USP, BAN, JAN       |                                                       | -0.07                                      | 0.61  | -0.06 | -0.29 | 0.05    |      |
| 01500233    | DEXTROMETHORPHAN HYDROBROMIDE  | 100122-05 | E03      | sample         | 6700-34-1, 125-69-9            | C18H28BrNO        | 352.31802  | antitussive                                                           | synthetic                                                |                     |                                                       |                                            |       |       |       |         |      |

| Compound ID MoName |                                        | plate     | position | Content        | cas#                              | Formula       | MoWt       | Bioactivity                                                     | Source                                                            | Status                 | Reference                                           | rep1  | rep2  | Screen Score (z-score) | rep4  | Average |
|--------------------|----------------------------------------|-----------|----------|----------------|-----------------------------------|---------------|------------|-----------------------------------------------------------------|-------------------------------------------------------------------|------------------------|-----------------------------------------------------|-------|-------|------------------------|-------|---------|
| 01500316           | GLUCOSAMINE HYDROCHLORIDE              | 100122-06 | C06      | sample         | 3416-24-8                         | C6H14ClNO5    | 215.63518  | antiarthritic                                                   | polysaccharides in bacteria, fungi, higher plants, invertebrates, | USAN, NF-XXI           | Adv Carbohydr Chem 15:159 (1960); Methods Carbohydr | 0.76  | 0.55  | -0.38                  | 0.58  | 0.38    |
| 01500319           | GRAMICIDIN                             | 100122-06 | C07      | sample         | 1405-97-6                         | C60H98N12O10  | 1141.67664 | antibacterial                                                   | Bacillus brevis                                                   | USP                    |                                                     | -2.65 | -0.70 | -1.74                  | -0.13 | -1.30   |
| 01500321           | GUAFENESIN                             | 100122-06 | C08      | sample         | 93-14-1                           | C10H14O4      | 198.22068  | expectorant                                                     |                                                                   | USP, INN, BAN, JAN     |                                                     | -0.81 | 0.37  | -0.28                  | 0.31  | 0.04    |
| 01500322           | GUANABENZ ACETATE                      | 100122-06 | C09      | sample         | 2356-60-0                         | C19H21ClNO4   | 351.38741  | antihypertensive                                                |                                                                   | USP, INN               |                                                     | 0.24  | 1.89  | 1.46                   | 0.74  | 1.53    |
| 01500323           | GUANETHIDINE SULFATE                   | 100122-06 | C10      | sample         | 60-026, 55-65-2                   | C10H14NO4S    | 296.39118  | antihypertensive, mitotic agent                                 |                                                                   | USP, INN, BAN          |                                                     | 1.08  | 0.92  | 0.91                   | 0.57  | 0.87    |
| 01500324           | HALAZONE                               | 100122-06 | C11      | sample         | 80-13-7                           | C7H5ClN2O4S   | 270.0922   | antifungal                                                      |                                                                   | USP, INN               |                                                     | 0.65  | 0.00  | 2.86                   | 1.45  | 1.24    |
| 0.11% JAK2zhnb     |                                        | 100122-06 | C12      | 0.11% jak2zhnb |                                   |               |            |                                                                 |                                                                   |                        |                                                     | 0.01  | -1.19 | -2.08                  | -1.47 | -1.44   |
| 0.11% DMSO         |                                        | 100122-06 | D01      | 0.11% dmso     |                                   |               |            |                                                                 |                                                                   |                        |                                                     | -0.99 | -0.12 | 3.81                   | 0.93  | 0.91    |
| 01500325           | HALOPERIDOL                            | 100122-06 | D02      | sample         | 52-86-8                           | C21H23ClFNO2  | 375.87438  | antidyskinetic, antipsychotic                                   |                                                                   | USP, INN, BAN, JAN     |                                                     | -1.75 | -1.90 | -0.97                  | -0.02 | -1.16   |
| 01500327           | HETACILLIN POTASSIUM                   | 100122-06 | D03      | sample         | 5321-32-4, 3511-16-8              | C19H22KN3O4S  | 427.57089  | antibacterial                                                   |                                                                   | USP-XII, JAN           |                                                     | -0.47 | -1.34 | -0.58                  | 4.54  | 0.54    |
| 01500328           | HEXACHLOROPHOSPHAZINE                  | 100122-06 | D010     | sample         | 70-30-4                           | C13H8Cl6O2    | 409.00567  | antileukemic (topical)                                          |                                                                   | USP, INN, BAN          |                                                     | 0.01  | 1.92  | 1.19                   | 0.92  | 0.79    |
| 01500330           | HEXYLRESORCINOL                        | 100122-06 | D05      | sample         | 136-77-6                          | C12H18O2      | 194.27606  | antibacterial, topical antiseptic                               |                                                                   | USP, BAN               |                                                     | -0.12 | 1.34  | -0.67                  | -0.23 | 0.08    |
| 01500331           | HISTAMINE DIPHOSPHORIC ACID            | 100122-06 | D06      | sample         | 51-45-6 [histamine]               | C5H11ClN2O3   | 184.06952  | H receptor agonist; induces edema in mammalian tissues; gastric |                                                                   | USAN                   | JACS 40:1716 (1918); J Biol Chem 180:703 (1949);    | 0.03  | 0.66  | 2.16                   | -0.02 | 0.73    |
| 01500332           | HOMATROPINE BROMIDE                    | 100122-06 | D07      | sample         | 51-66-1, 87-00-3 [homatropine]    | C16H25BrNO3   | 356.32636  | anticholinergic (ophthalmic)                                    |                                                                   | USP, JAN               |                                                     | 0.02  | 0.58  | 0.17                   | 0.02  | 0.15    |
| 01500333           | HOMATROPINE METHYLBROMIDE              | 100122-06 | D08      | sample         | 80-49-6, 87-00-3 [homatropine]    | C17H24BrNO3   | 370.28973  | anticholinergic (opthalmic)                                     |                                                                   | USP, INN               |                                                     | 0.03  | 0.80  | 0.80                   | 0.70  | 0.58    |
| 01500334           | HYDRALAZINE HYDROCHLORIDE              | 100122-06 | D09      | sample         | 304-20-1, 86-64-4 [hydralazine]   | C8H9ClN4      | 196.64073  | antihypertensive                                                |                                                                   | USP, INN, BAN          |                                                     | -1.47 | -1.03 | -0.18                  | -0.67 | -0.84   |
| 01500335           | HYDROCHLORIDE                          | 100122-06 | D10      | sample         | 58-83-5                           | C7H9ClNO3S4S2 | 297.14051  | diuretic                                                        |                                                                   | USP, INN, BAN, JAN     |                                                     | 0.38  | -0.47 | 1.40                   | 0.93  | 0.56    |
| 01500338           | HYDROCORTISONE ACETATE                 | 100122-06 | D11      | sample         | 50-03-3                           | C23H32O6      | 404.50789  | glucocorticoid, antiinflammatory                                |                                                                   | USP, INN, BAN, JAN     |                                                     | 1.59  | -0.11 | -2.20                  | -0.45 | 0.36    |
| 0.11% JAK2zhnb     |                                        | 100122-06 | D12      | 0.11% jak2zhnb |                                   |               |            |                                                                 |                                                                   |                        |                                                     | 2.16  | -3.85 | -1.14                  | 0.36  | -1.75   |
| 0.11% JAK2zhnb     |                                        | 100122-06 | E01      | 0.11% jak2zhnb |                                   |               |            |                                                                 |                                                                   |                        |                                                     | -2.37 | 0.94  | -0.47                  | -2.11 | 0.13    |
| 01500339           | HYDROCORTISONE HEMISUCCINATE           | 100122-06 | E02      | sample         | 83784-20-7, 2203-97-6             | C29H34O8      | 462.54403  | glucocorticoid                                                  |                                                                   | USP, JAN               |                                                     | -1.89 | -0.45 | -5.57                  | -2.06 | -0.49   |
| 01500340           | HYDROCORTISONE PHOSPHATE TRIETHYLAMINE | 100122-06 | E03      | sample         | 3863-59-0 [cortisol 21-]          | C33H61N2O8P   | 644.83652  | glucocorticoid                                                  |                                                                   | USP, INN, BAN, JAN     |                                                     | -0.60 | 2.37  | -0.84                  | 0.00  | 0.23    |
| 01500341           | HYDROFLUMETHAZIDE                      | 100122-06 | E04      | sample         | 135-09-1                          | C18H19F3NO4S2 | 331.29398  | antihypertensive, diuretic                                      |                                                                   | USP, INN, BAN, JAN     |                                                     | 0.01  | 0.38  | -0.21                  | 0.30  | 0.10    |
| 01500343           | HYDROXYPROGESTERONE CAPROATE           | 100122-06 | E05      | sample         | 630-56-8, 66-96-2                 | C27H44O4      | 426.61745  | progestagen                                                     |                                                                   | USP, INN, JAN          |                                                     | 0.01  | 0.88  | -2.25                  | -1.38 | -0.81   |
| 01500344           | HYDROXYUREA                            | 100122-06 | E06      | sample         | 127-07-1                          | C4H4N2O2      | 76.05523   | antineoplastic, inhibits ribonucleoside diphosphate reductase   |                                                                   | USP, INN, BAN          |                                                     | -1.01 | -1.04 | -0.79                  | -1.43 | -1.32   |
| 01500345           | HYDROXYZINE PAMOTATE                   | 100122-06 | E07      | sample         | 10246-75-0, 88-88-2               | C44H43ClN2O8  | 763.29491  | anxiolytic, antihistaminic                                      |                                                                   | USP, JAN               |                                                     | -1.00 | 0.94  | -0.93                  | -0.64 | -0.41   |
| 01500346           | HYOSCYAMINE                            | 100122-06 | E08      | sample         | 101-31-5                          | C17H23NO3     | 289.37776  | anticholinergic, analgesic                                      |                                                                   | USP, BAN               |                                                     | 0.53  | 0.60  | -1.02                  | 0.25  | -0.17   |
| 01500347           | BURKHOFFEN                             | 100122-06 | E09      | sample         | 15687-27-1, 58560-75-1 [+/-]      | C19H18O2      | 266.2571   | antifungal                                                      |                                                                   | USP, INN, BAN, JAN     |                                                     | 1.04  | 0.73  | 0.77                   | 0.23  | 0.61    |
| 01500348           | IMPRAMINE HYDROCHLORIDE                | 100122-06 | E10      | sample         | 113-52-0, 50-40-7 [imipramine]    | C19H25ClN2    | 316.8775   | antidepressant                                                  |                                                                   | USP, INN, BAN, JAN     |                                                     | 0.89  | 1.29  | 0.77                   | 0.82  | 0.94    |
| 01500349           | INDAPAMIDE                             | 100122-06 | E11      | sample         | 26807-65-8                        | C16H16ClN3O3S | 365.94122  | diuretic, antihypertensive                                      |                                                                   | USP, INN, BAN, JAN     |                                                     | 1.96  | -0.32 | 2.31                   | 0.77  | 1.18    |
| 0.11% DMSO         |                                        | 100122-06 | E12      | 0.11% dmso     |                                   |               |            |                                                                 |                                                                   |                        |                                                     | 0.1   | -1.16 | 0.01                   | 0.61  | 0.63    |
| 0.11% JAK2zhnb     |                                        | 100122-06 | F01      | 0.11% jak2zhnb |                                   |               |            |                                                                 |                                                                   |                        |                                                     | -5.85 | -2.47 | -3.85                  | 1.43  | -2.68   |
| 01500350           | INDOMETHACIN                           | 100122-06 | F02      | sample         | 53-86-1                           | C19H16ClNO4   | 357.76667  | antiinflammatory, antipyretic, analgesic                        |                                                                   | USP, INN, BAN, JAN     |                                                     | -2.43 | -1.95 | -2.44                  | -0.85 | -1.92   |
| 01500351           | INDOPROFEN                             | 100122-06 | F03      | sample         | 31842-01-0                        | C17H15NO3     | 281.314    | analgesic, antiinflammatory                                     |                                                                   | USAN, INN, BAN         |                                                     | -1.42 | 0.24  | -3.24                  | 3.44  | 1.86    |
| 01500352           | INDISTOL                               | 100122-06 | F04      | sample         | 87-89-8                           | C8H12O6       | 180.1584   | growth factor                                                   |                                                                   | USP, INN               |                                                     | 0.02  | 0.84  | 0.39                   | 0.00  | 0.03    |
| 01500353           | IODQUINOL                              | 100122-06 | F05      | sample         | 83-70-8                           | C9H5I2NO      | 396.9551   | antiamebic                                                      |                                                                   | USP, INN, BAN          |                                                     | -0.69 | 1.17  | 4.21                   | 0.15  | 1.21    |
| 01500354           | IPRATROPIUM BROMIDE                    | 100122-06 | F06      | sample         | 66985-17-9, 22524-24-6            | C20H30BrNO3   | 412.371    | bronchodilator, antihistaminic                                  |                                                                   | USAN, INN, BAN, JAN    |                                                     | -0.09 | 4.67  | -0.61                  | 0.21  | 1.04    |
| 01500355           | ISONIAZID                              | 100122-06 | F07      | sample         | 54-84-3                           | C6H7NO3       | 137.14219  | antibacterial, antituberculous                                  |                                                                   | USP, INN, BAN, JAN     |                                                     | 0.19  | -0.40 | -2.39                  | -0.67 | -0.07   |
| 01500356           | ISOPROPAMIDE IODIDE                    | 100122-06 | F08      | sample         | 71-81-8, 7492-32-2                | C23H33I2NO2   | 480.43666  | bronchodilator                                                  |                                                                   | USP, INN, BAN, JAN     |                                                     | -0.22 | 1.85  | -2.15                  | -0.05 | 0.93    |
| 01500357           | ISOPROTERENOL HYDROCHLORIDE            | 100122-06 | F09      | sample         | 51-30-9, 7683-59-2                | C11H16ClNO3   | 247.72401  | anticholinergic                                                 |                                                                   | USP, INN, BAN, JAN     |                                                     | 0.30  | 0.63  | -0.09                  | -0.14 | 0.18    |
| 01500358           | ISOSORBIDE DINITRATE                   | 100122-06 | F10      | sample         | 286-13026                         | C12H16N2O6    | 286.13026  | antitanginal                                                    |                                                                   | USP, INN, BAN, JAN     |                                                     | 1.59  | 1.33  | 2.85                   | 1.75  | 1.88    |
| 01500359           | ISOSUXEPINE HYDROCHLORIDE              | 100122-06 | F11      | sample         | 579-56-6, 395-28-8                | C18H24ClNO3   | 337.84968  | vasodilator                                                     |                                                                   | USP, INN, BAN, JAN     |                                                     | 2.33  | 1.25  | 2.47                   | 2.12  | 2.04    |
| 0.04% DMSO         |                                        | 100122-06 | F12      | 0.04% dmso     |                                   |               |            |                                                                 |                                                                   |                        |                                                     | 1.07  | -1.12 | 1.25                   | 0.84  | 0.51    |
| 0.04% JAK2zhnb     |                                        | 100122-06 | G01      | 0.04% jak2zhnb |                                   |               |            |                                                                 |                                                                   |                        |                                                     | -4.74 | -6.15 | -3.45                  | -2.67 | -4.25   |
| 01500360           | KANAMYCIN A SULFATE                    | 100122-06 | G02      | sample         | 25389-04-0, 133-92-6              | C18H38N4O15S  | 582.58536  | antibacterial                                                   |                                                                   | USP, INN, BAN, JAN     |                                                     | -3.11 | -2.16 | -1.38                  | -1.66 | -1.61   |
| 01500362           | KETOCONAZOLE                           | 100122-06 | G03      | sample         | 65277-42-1                        | C26H28Cl2N4O4 | 513.44346  | antifungal, PXR/SRC1 & CAR/SRC1 inhibitor                       |                                                                   | Oncogene 26:258 (2007) |                                                     | -2.23 | -3.49 | -3.16                  | -2.41 | -2.82   |
| 01500363           | LACTULOSE                              | 100122-06 | G04      | sample         | 4616-18-2                         | C12H22O11     | 342.30254  | laxative                                                        |                                                                   | USP, INN, BAN, JAN     |                                                     | 0.26  | -0.48 | -0.21                  | 0.47  | 0.01    |
| 01500364           | LEUCOVORIN CALCIUM                     | 100122-06 | G05      | sample         | 1405-22-8                         | C20H21ClN7O7  | 511.51307  | antimanic, antidote to folic acid antagonists                   |                                                                   | USP, INN, BAN, JAN     |                                                     | 0.09  | 0.57  | 0.08                   | 0.57  | 0.08    |
| 01500365           | LEVONORDEFIN                           | 100122-06 | G06      | sample         | 829-74-3, 18826-78-2              | C9H13NO3      | 183.20886  | vasoconstrictor                                                 |                                                                   | USP, INN               |                                                     | 1.18  | 0.89  | -0.55                  | 0.10  | 0.34    |
| 01500368           | LINCOCYCLIN HYDROCHLORIDE              | 100122-06 | G07      | sample         | 7179-49-9, 859-18-7               | C18H25ClN3O2S | 443.00485  | antibacterial                                                   |                                                                   | USAN, INN, BAN         |                                                     | -1.33 | 0.70  | 0.38                   | 0.39  | 0.34    |
| 01500379           | MEDROXYPROGESTERONE ACETATE            | 100122-06 | G08      | sample         | 71-58-8, 525-85-4                 | C24H34O4      | 386.53818  | contraceptive                                                   |                                                                   | USP, INN, BAN, JAN     |                                                     | -1.23 | 0.00  | -0.36                  | -0.74 | -0.58   |
| 01500383           | MEPHENAZOL HYDROCHLORIDE               | 100122-06 | G09      | sample         | 76-04-2, 26960-43-6               | C12H15BrNO2   | 420.12607  | anticholinergic                                                 |                                                                   | USP, INN, BAN, JAN     |                                                     | 1.05  | 0.62  | 0.86                   | 0.24  | 0.35    |
| 01500387           | MERCAPTOPYRINE                         | 100122-06 | G10      | sample         | 6112-76-1, 50-44-2 [anhydrous]    | C5H4N4S       | 152.17843  | antineoplastic, purine antimetabolite                           |                                                                   | USP, INN, BAN, JAN     |                                                     | 1.57  | 0.92  | 0.22                   | -0.18 | 0.63    |
| 01500394           | METHENAMINE                            | 100122-06 | G11      | sample         | 100-97-0                          | C6H12N4       | 140.18934  | antibacterial (urinary)                                         |                                                                   | USP, INN, JAN          |                                                     | 1.71  | 2.36  | 0.87                   | 1.18  | 1.53    |
| 0.04% DMSO         |                                        | 100122-06 | G12      | 0.04% dmso     |                                   |               |            |                                                                 |                                                                   |                        |                                                     | 0.34  | -0.24 | 0.33                   | 0.24  | 0.48    |
| 0.04% JAK2zhnb     |                                        | 100122-06 | H01      | 0.04% jak2zhnb |                                   |               |            |                                                                 |                                                                   |                        |                                                     | -4.33 | -6.51 | -3.76                  | -3.84 | -4.61   |
| 01500395           | METHICILLIN SODIUM                     | 100122-06 | H02      | sample         | 7246-14-2, 132-92-3               | C17H19N2NaO6S | 402.40458  | antibacterial                                                   |                                                                   | USAN, INN, BAN, JAN    |                                                     | -1.89 | -2.36 | -1.34                  | -1.12 | -1.68   |
| 01500400           | METHOXSALEN                            | 100122-06 | H03      | sample         | 298-81-1                          | C12H8O4       | 216.15616  | antipsychotic, pigmentation agent                               |                                                                   | USP, BAN, JAN          |                                                     | -1.23 | -0.70 | 1.79                   | -1.91 | -0.51   |
| 01500404           | METHYLERGOLINE MALEATE                 | 100122-06 | H04      | sample         | 57435-51-8, 7054-07-1             | C24H29NO6     | 455.51923  | oxytocic                                                        |                                                                   | USP, INN, BAN, JAN     |                                                     | 0.04  | 0.50  | -0.10                  | -0.18 | -0.18   |
| 01500408           | METHYLTIOURACIL                        | 100122-06 | H05      | sample         | 56-04-2                           | C5H6N2O2      | 142.10307  | antithyroid agent                                               |                                                                   | USP, XXI, INN          |                                                     | -0.92 | -1.07 | -0.78                  | -3.30 | 0.92    |
| 01500413           | MICONAZOLE NITRATE                     | 100122-06 | H06      | sample         | 22832-57-7, 22916-47-8            | C18H15ClN4O3  | 479.14995  | antifungal (topical)                                            |                                                                   | USP, JAN               |                                                     | 0.01  | -0.65 | -1.00                  | 1.97  | 0.33    |
| 01500427           | NECOMYCIN SULFATE                      | 100122-06 | H07      | sample         | 1405-10-3, 1404-04-2              | C23H40N6O17S  | 716.13301  | antibacterial                                                   |                                                                   | USP, INN               |                                                     | 0.16  | 0.86  | 0.61                   | 0.10  | 0.51    |
| 01500434           | NITROFURAZONE                          | 100122-06 | H08      | sample         | 59-87-0                           | C6H6N4O4      | 198.13912  | antileukemic (topical)                                          |                                                                   | USP, INN               |                                                     | -2.86 | -0.79 | -2.84                  | -3.01 | -2.38   |
| 01500435           | NITROMIDE                              | 100122-06 | H09      | sample         | 121-81-3                          | C7H7N3O5      | 211.135    | antibacterial, coccidiostat                                     |                                                                   | USAN                   |                                                     | 0.09  | -0.09 | -2.39                  | -2.77 | -1.42   |
| 01500438           | NORTHRINDONE ACETATE                   | 100122-06 | H10      | sample         | 51-88-4                           | C20H26NO3     | 340.46803  | Oral contraceptive (in combination with estrogen)               |                                                                   | USP, INN               |                                                     | 0.35  | -1.18 | -3.12                  | -1.76 | -0.49   |
| 01500450           | OXIDOPAMINE HYDROCHLORIDE              | 100122-06 | H11      | sample         | 1199-18-4                         | C8H12ClNO3    | 205.64274  | adrenergic agent (ophthalmic)                                   |                                                                   | USAN, INN              |                                                     | 1.53  | -0.86 | 0.71                   | -0.63 | 0.19    |
| empty              |                                        | 100122-06 | H12      | sample         |                                   |               |            |                                                                 |                                                                   |                        |                                                     | NA    | NA    | NA                     | NA    | NA      |
| empty              |                                        | 100122-07 | A01      | sample         |                                   |               |            |                                                                 |                                                                   |                        |                                                     | NA    | NA    | NA                     | NA    | NA      |
| 01500456           | OXOQUINOLINE HEMISULFATE               | 100122-07 | A02      | sample         | 146-24-3                          | C9H9NOSS      | 243.23978  | antifungal                                                      |                                                                   | USAN                   |                                                     | -2.04 | -0.78 | -1.21                  | -0.78 | -1.21   |
| 01500465           | PENICILLIN G POTASSIUM                 | 100122-07 | A03      | sample         | 69-57-8, 61-33-6 [penicillin, G]  | C16H17KN2O4S  | 372.49089  | antibacterial                                                   |                                                                   | USP, BAN, JAN          |                                                     | -0.18 | -1.70 | 1.17                   | 4.06  | 0.84    |
| 01500467           | PENICILLIN V POTASSIUM                 | 100122-07 | A04      | sample         | 132-98-9, 87-08-1 [penicillin, V] | C16H17KN2O5S  | 388.49029  | antibacterial                                                   |                                                                   | USP, JAN               |                                                     | -1.06 | -1.77 | -0.76                  | -1.99 | -1.39   |
| 01500480           | PENICILLIN FUSIDATE                    | 100122-07 |          |                |                                   |               |            |                                                                 |                                                                   |                        |                                                     |       |       |                        |       |         |

|         |                                |           |     |                |                                 |                |            |                                                   |                                                  |                    |                                                     | Screen Score (z-score) |       |       |       |         |       |
|---------|--------------------------------|-----------|-----|----------------|---------------------------------|----------------|------------|---------------------------------------------------|--------------------------------------------------|--------------------|-----------------------------------------------------|------------------------|-------|-------|-------|---------|-------|
|         |                                |           |     |                |                                 |                |            |                                                   |                                                  |                    |                                                     | rep1                   | rep2  | rep3  | rep4  | Average |       |
| 0100043 | STREPTOZOSIN                   | 100122-07 | F02 | sample         | 18883-66-4                      | C8H15N3O7      | 265.22465  | antineoplastic, alkylating agent                  | synthetic                                        | USAN, INN          |                                                     | -1.15                  | -1.25 | -0.03 | -1.23 | -0.91   |       |
| 0100044 | SULFABENZAMIDE                 | 100122-07 | F03 | sample         | 127-71-9                        | C13H12N2O3S    | 276.31619  | antibacterial                                     | synthetic                                        | USP, INN, BAN      |                                                     | 0.69                   | -1.01 | 1.02  | 0.87  | 1.61    |       |
| 0100045 | SULFACETAMIDE                  | 100122-07 | F04 | sample         | 144-80-9, 127-56-0              | C8H10N2O3S     | 214.2445   | antibacterial                                     | synthetic                                        | USP, INN, BAN      |                                                     | -0.30                  | 0.76  | 1.28  | -0.41 | 0.33    |       |
| 0100046 | SULFADIAZINE                   | 100122-07 | F05 | sample         | 68-35-9                         | C10H10N4O2S    | 250.2808   | antibacterial                                     | synthetic                                        | USP, INN, BAN, JAN |                                                     | 1.18                   | 0.59  | -0.51 | -0.22 | 0.36    |       |
| 0100047 | SULFAMERAZINE                  | 100122-07 | F06 | sample         | 127-79-7                        | C11H12N4O2S    | 264.30789  | antibacterial                                     | synthetic                                        | USP-XCII, INN, BAN |                                                     | 0.89                   | 0.59  | -0.24 | 0.24  | 1.62    |       |
| 0100048 | SULFAMETHAZINE                 | 100122-07 | F07 | sample         | 57-68-1                         | C12H14N4O2S    | 273.3498   | antibacterial                                     | synthetic                                        | USP, INN, BAN      |                                                     | -1.62                  | 0.73  | -0.89 | -0.59 | -0.59   |       |
| 0100049 | SULFAMETHOXAZOLE               | 100122-07 | F08 | sample         | 144-82-1                        | C9H10N4O2S2    | 270.3365   | antibacterial                                     | synthetic                                        | USP, INN, BAN, JAN |                                                     | -0.88                  | -0.48 | 0.72  | 1.86  | 0.56    |       |
| 0100050 | SULFAMETHOXAZOLE               | 100122-07 | F09 | sample         | 723-46-6                        | C10H11N3O3S    | 253.25147  | antibacterial, antipneumocystis                   | synthetic                                        | USP, INN, BAN, JAN |                                                     | 0.66                   | -0.11 | 2.69  | 1.30  | 1.14    |       |
| 0100051 | SULFAPYRIDINE                  | 100122-07 | F10 | sample         | 144-83-2                        | C11H11N3O2S    | 249.20322  | antibacterial                                     | synthetic                                        | USP, INN, BAN      |                                                     | 1.41                   | 0.29  | 1.69  | 0.31  | 0.92    |       |
| 0100052 | SULFASALAZINE                  | 100122-07 | F11 | sample         | 599-79-1                        | C18H14N4O5S    | 398.40008  | anticoilits and Crohn's disease                   | synthetic                                        | USP, INN, BAN      |                                                     | 1.24                   | 0.49  | -0.87 | -0.29 | 0.14    |       |
| 0100053 | 0.04% DMSO<br>0.04% JAK2inhb   | 100122-07 | F12 | 0.04% dms0     |                                 |                |            |                                                   |                                                  |                    |                                                     | 0.04% dms0             | -0.18 | -0.25 | -0.31 | -0.01   | -0.10 |
|         |                                | 100122-07 | G01 | 0.04% jak2inhb |                                 |                |            |                                                   |                                                  |                    |                                                     | -3.03                  | -2.72 | -0.83 | -3.50 | -2.52   |       |
| 0100054 | SULFATHIAZOLE                  | 100122-07 | G02 | sample         | 72-14-0                         | C9H9N3O2S2     | 255.31898  | antibacterial                                     | synthetic                                        | USP, INN, BAN      |                                                     | -0.80                  | -1.64 | -0.56 | -0.69 | -0.93   |       |
| 0100055 | SULFINPYRAZONE                 | 100122-07 | G03 | sample         | 67-86-5                         | C23H20N2O3S    | 404.40145  | uricosuric                                        | synthetic                                        | USP, INN, BAN, JAN |                                                     | -0.07                  | 0.29  | 0.88  | -0.09 | 0.00    |       |
| 0100056 | SULFISOXAZOLE                  | 100122-07 | G04 | sample         | 127-69-5                        | C11H13N3O3S    | 267.30856  | antibacterial                                     | synthetic                                        | USP, INN, BAN, JAN |                                                     | -1.36                  | -0.96 | -0.35 | -0.24 | -0.73   |       |
| 0100056 | SULINDAC                       | 100122-07 | G05 | sample         | 38194-00-2                      | C20H17F3O3S    | 366.41909  | antiinflammatory                                  | synthetic                                        | USP, INN, BAN, JAN |                                                     | -1.53                  | -0.21 | -0.76 | -0.41 | -0.73   |       |
| 0100057 | TAMOXIFEN CITRATE              | 100122-07 | G06 | sample         | 54895-24-1, 10540-29-1          | C23H27NO3      | 353.55359  | estrogen antagonist, antineoplastic               | synthetic                                        | USP, INN, BAN, JAN |                                                     | 0.33                   | 0.54  | 0.16  | 1.21  | 0.61    |       |
| 0100058 | TERBUTALINE HEMISULFATE        | 100122-07 | G07 | sample         | 23031-32-5, 23031-25-6          | C12H21NO7S     | 323.38767  | betaadrenergic agonist, bronchodilator            | synthetic                                        | USP, INN, BAN, JAN |                                                     | 1.31                   | 1.48  | 0.76  | -0.06 | 1.22    |       |
| 0100058 | TETRACANINE HYDROCHLORIDE      | 100122-07 | G08 | sample         | 136-47-0, 94-24-6 [tetracaine]  | C19H25ClN2O2   | 300.8317   | anesthetic (local)                                | synthetic                                        | USP, BAN, JAN      |                                                     | -0.73                  | 0.94  | -0.60 | 1.23  | 0.21    |       |
| 0100058 | TETRAHYDROCLINE HYDROCHLORIDE  | 100122-07 | G09 | sample         | 64-75-5, 60-54-8 [tetracycline] | C22H25ClN2O8   | 480.90615  | antibacterial, antelmatic, antirickettsial        | Streptomyces spp                                 | USP, INN, BAN, JAN |                                                     | 0.28                   | -0.38 | -0.26 | 1.30  | 0.23    |       |
| 0100057 | TETRAHYDROZOLINE HYDROCHLORIDE | 100122-07 | G10 | sample         | 522-48-5, 84-22-0               | C18H17ClN2O2   | 236.74684  | adrenergic agonist, nasal decongestant            | synthetic                                        | USP, INN, BAN, JAN |                                                     | 0.35                   | -1.00 | -0.88 | 0.67  | -0.21   |       |
| 0100070 | THIABENAZOLE                   | 100122-07 | G11 | sample         | 148-79-8                        | C10H7N3S       | 201.25139  | antimetitmic                                      | synthetic                                        | USP, INN, BAN, JAN |                                                     | 1.89                   | 3.90  | 2.31  | 1.85  | 2.49    |       |
| 0100071 | 0.04% DMSO<br>0.04% JAK2inhb   | 100122-07 | G12 | 0.04% dms0     |                                 |                |            |                                                   |                                                  |                    |                                                     | 0.39                   | 2.25  | 0.93  | 0.11  | 0.45    |       |
|         |                                | 100122-07 | H01 | 0.04% jak2inhb |                                 |                |            |                                                   |                                                  |                    |                                                     | -0.71                  | -3.94 | -2.27 | -4.12 | -2.76   |       |
| 0100072 | THIMEROSAL                     | 100122-07 | H02 | sample         | 54-64-8                         | C9H9HgNaO2S    | 404.81468  | antifinfecive, preservative                       | synthetic                                        | USP, INN, BAN, JAN |                                                     | -8.47                  | -6.08 | -0.93 | -7.86 | -7.94   |       |
| 0100073 | THIOGUANINE                    | 100122-07 | H03 | sample         | 154-42-7, 5580-03-0             | C5H5N5NS       | 167.1931   | antineoplastic, purine antimetabolite             | synthetic                                        | USP, INN, BAN      |                                                     | -1.98                  | -1.56 | -0.66 | -0.04 | -0.42   |       |
| 0100075 | THIOURDIAZINE HYDROCHLORIDE    | 100122-07 | H04 | sample         | 130-61-0, 50-52-2 [thionadine]  | C12H22ClN2S2   | 407.04374  | antipshotic                                       | synthetic                                        | USP, INN, BAN      |                                                     | -0.98                  | -1.00 | -0.89 | 3.75  | -0.26   |       |
| 0100076 | THIOXETHANE                    | 100122-07 | H05 | sample         | 5891-45-7, 3313-26-6 [2,2']     | C23H28ClN2O3S2 | 443.53445  | antipshotic                                       | synthetic                                        | USP, INN, BAN, JAN |                                                     | -0.73                  | -4.67 | -0.29 | 0.73  | -0.46   |       |
| 0100078 | TIMOLOL MALEATE                | 100122-07 | H06 | sample         | 26921-17-5, 91524-16-2          | C17H28N4O7S    | 432.49931  | betaadrenergic blocker                            | synthetic                                        | USP, JAN           |                                                     | -1.98                  | 3.73  | -0.23 | 0.17  | 0.66    |       |
| 0100079 | TORAMYCIN                      | 100122-07 | H07 | sample         | 32988-56-4                      | C18H27NSO9     | 467.52369  | antibacterial, inhibits protein synthesis         | Streptomyces spp                                 | USP, INN, BAN, JAN |                                                     | -0.30                  | 0.34  | 0.75  | 0.70  | 0.37    |       |
| 0100080 | TOLAZOLINE HYDROCHLORIDE       | 100122-07 | H08 | sample         | 59-97-2, 59-98-3 [tolazoline]   | C16H15ClN2O2   | 196.8151   | adrenergic agonist                                | synthetic                                        | USP, INN, BAN, JAN |                                                     | -0.36                  | -0.13 | -0.13 | 1.19  | 0.32    |       |
| 0100081 | TOLBUTAMIDE                    | 100122-07 | H09 | sample         | 64-77-7                         | C12H18N2O3S    | 270.35286  | antidiabetic                                      | synthetic                                        | USP, INN, BAN, JAN |                                                     | 1.08                   | 1.25  | 0.14  | 0.74  | 0.80    |       |
| 0100084 | TRANLYCYPROMINE SULFATE        | 100122-07 | H10 | sample         | 134920-01-8, 7081-36-9          | C9H13N3O4S4    | 231.27226  | antidepressant, MAO inhibitor                     | synthetic                                        | USP-XXI, INN, BAN  | Arch Pharmacol Res 10: 50 (1987)                    | 0.20                   | 0.19  | 0.65  | -0.03 | 0.25    |       |
| 0100085 | TRIACETIN                      | 100122-07 | H11 | sample         | 102-76-1                        | C9H14O6        | 218.20833  | antifungal (topical)                              | synthetic                                        | USP, INN, BAN      |                                                     | 0.35                   | 0.27  | 0.40  | 0.31  | 0.33    |       |
| 0100086 | empty                          | 100122-07 | H12 | sample         | NA                              | NA             | NA         | NA                                                | NA                                               | NA                 |                                                     | NA                     | NA    | NA    | NA    | NA      |       |
|         |                                | 100122-08 | A01 | sample         | NA                              | NA             | NA         | NA                                                | NA                                               | NA                 |                                                     | NA                     | NA    | NA    | NA    | NA      |       |
| 0100086 | TRAMACINOLONE                  | 100122-08 | A02 | sample         | 124-94-7                        | C21H27F6O      | 394.44414  | glucocorticoid                                    | semisynthetic                                    | USP, INN, BAN, JAN |                                                     | -1.09                  | -1.50 | -1.06 | -2.44 | -1.52   |       |
| 0100087 | TRAMCINOLONE ACETONIDE         | 100122-08 | A03 | sample         | 76-25-5                         | C24H31F6O2     | 434.55047  | antiinflammatory                                  | semisynthetic                                    | USP, INN, BAN, JAN |                                                     | -0.72                  | -0.79 | 1.46  | 0.34  | 0.34    |       |
| 0100088 | TRAMCINOLONE DIACETATE         | 100122-08 | A04 | sample         | 67-78-7                         | C28H31F8O2     | 475.51942  | antiinflammatory                                  | semisynthetic                                    | USP, JAN           |                                                     | -0.67                  | -1.57 | -0.70 | -1.38 | -1.08   |       |
| 0100089 | TRAMETERENE                    | 100122-08 | A05 | sample         | 396-01-0                        | C12H11N7       | 253.26837  | diuretic                                          | semisynthetic                                    | USP, INN, BAN, JAN |                                                     | -1.34                  | -1.00 | -0.24 | -0.89 | -0.87   |       |
| 0100090 | TRICHLORMETHAZIDE              | 100122-08 | A06 | sample         | 133-67-5                        | C9H8ClN3O4S2   | 386.05039  | diuretic, antihypertensive                        | synthetic                                        | USP, INN, JAN      |                                                     | -1.34                  | -1.00 | -0.90 | -0.66 | -0.86   |       |
| 0100091 | TRIFLUOPERAZINE HYDROCHLORIDE  | 100122-08 | A07 | sample         | 440-17-5, 117-89-5              | C12H26ClF3N3S  | 480.42667  | antipshotic                                       | synthetic                                        | USP, INN, BAN, JAN |                                                     | -1.11                  | 0.34  | 0.02  | 0.34  | 0.02    |       |
| 0100092 | TRIHENXYPHENIDYL HYDROCHLORIDE | 100122-08 | A08 | sample         | 52-49-3                         | C20H32ClN2O    | 337.93714  | anticholinergic, antiparkinsonian                 | synthetic                                        | USP, INN, BAN, JAN |                                                     | 0.21                   | -1.29 | -1.14 | 0.18  | -0.51   |       |
| 0100093 | TRIMEPRAZINE TARTRATE          | 100122-08 | A09 | sample         | 4303-99-8, 41375-66-0           | C22H28ClN2O8   | 448.54296  | antipshotic                                       | synthetic                                        | USP, INN, BAN, JAN |                                                     | 0.36                   | -0.75 | -1.45 | -0.45 | -0.58   |       |
| 0100094 | TRIMETHOPRIM                   | 100122-08 | A10 | sample         | 738-701-4                       | C14H18N4O3     | 290.34546  | antibacterial                                     | synthetic                                        | USP, INN, BAN, JAN |                                                     | 3.54                   | -0.24 | 0.47  | 0.24  | 0.34    |       |
| 0100096 | TROXSALEN                      | 100122-08 | A11 | sample         | 3902-71-4                       | C14H12O3       | 228.24994  | metalinizing agent, antipshotic                   | synthetic                                        | USP, INN, JAN      |                                                     | 0.67                   | -1.92 | -1.07 | -1.14 | -0.87   |       |
| 0100097 | 0.04% JAK2inhb                 | 100122-08 | B12 | 0.04% jak2inhb |                                 |                |            |                                                   |                                                  |                    |                                                     | -1.02                  | -2.28 | -1.65 | -2.89 | -1.96   |       |
|         |                                | 100122-08 | B01 | 0.04% dms0     |                                 |                |            |                                                   |                                                  |                    |                                                     | -0.98                  | -0.28 | -1.23 | -0.45 | -0.45   |       |
| 0100097 | TRIPLEENAMINE CITRATE          | 100122-08 | B02 | sample         | 6138-56-3, 91-81-6              | C22H29N3O7     | 447.49233  | antihistaminic                                    | synthetic                                        | USP, BAN           |                                                     | -1.15                  | -0.50 | -0.27 | -0.40 | -0.58   |       |
| 0100098 | TRIPROLOLIDINE HYDROCHLORIDE   | 100122-08 | B03 | sample         | 6138-79-0, 550-70-9             | C19H23ClN2     | 314.86156  | antihistaminic                                    | synthetic                                        | USP, INN, BAN, JAN |                                                     | 0.26                   | 0.06  | -0.30 | 0.93  | 0.24    |       |
| 0100099 | TROPICAMIDE                    | 100122-08 | B04 | sample         | 1506-75-4                       | C17H26N2O2     | 284.36115  | anticholinergic (ophthalmic)                      | synthetic                                        | USP, INN, BAN, JAN |                                                     | 1.18                   | 0.64  | 0.67  | 0.50  | 0.50    |       |
| 0100100 | TRYPTOPHAN                     | 100122-08 | B05 | sample         | 73-22-3                         | C11H12N2O2     | 204.23402  | antidepressant, nutrient, LD50(rat) 1634 mg/kg ip | synthetic                                        | USP, INN, JAN      | Biochem J 29:2256 (1955); JACS 67:36 (1945); Aust J | 0.62                   | -0.70 | -0.63 | -0.10 | -0.34   |       |
| 0100101 | TUAMINOHEPTANE SULFATE         | 100122-08 | B06 | sample         | 6411-75-2, 132-82-0             | C17H19NO4S     | 315.29776  | adrenergic agent                                  | synthetic                                        | USP-XX             |                                                     | -0.29                  | 1.30  | 0.00  | -0.49 | 0.61    |       |
| 0100103 | TYMOTHICIN                     | 100122-08 | B07 | sample         | 1404-88-2                       | C66H89N11O15   | 1227.40853 | antibacterial (topical)                           | Bacillus aneurinolyticus; mixture of gramicidins |                    |                                                     |                        |       |       |       |         |       |

| Compound ID | MoName                                | plate     | position | Content         | cas#                                              | Formula         | MoWt       | Bioactivity                                           | Source                         | Status              | Reference                                                                                                                                                  | Screen Score (z-score) |       |         |       | Average |
|-------------|---------------------------------------|-----------|----------|-----------------|---------------------------------------------------|-----------------|------------|-------------------------------------------------------|--------------------------------|---------------------|------------------------------------------------------------------------------------------------------------------------------------------------------------|------------------------|-------|---------|-------|---------|
|             |                                       |           |          |                 |                                                   |                 |            |                                                       |                                |                     |                                                                                                                                                            | rep1                   | rep2  | rep3    | rep4  |         |
| 05101008    | FENBUFEN                              | 100122-08 | H10      | sample          | 36330-85-5                                        | C18H14O3        | 254.28818  | antiflammatory                                        | synthetic                      | USAN, INN, BAN, JAN |                                                                                                                                                            | 0.16                   | 0.80  | 4.36    | 0.40  | 1.43    |
| 05101117    | MEBEVERINE HYDROCHLORIDE              | 100122-08 | H11      | sample          | 2753-45-9, 3625-06-7                              | C25H36ClNO5     | 466.02237  | muscle relaxant (smooth)                              | synthetic                      | USAN, INN, BAN      |                                                                                                                                                            | 0.59                   | -0.35 | -0.08   | -0.65 | -0.12   |
|             | empty                                 | 100122-09 | H12      | sample          |                                                   |                 |            |                                                       |                                |                     |                                                                                                                                                            | NA                     | NA    | NA      | NA    | NA      |
| 05101214    | ACECLIDINE                            | 100122-09 | A02      | sample          | 827-61-2                                          | C9H15NO2        | 169.2254   | cholinergic                                           | synthetic                      | USAN, INN           | Mol Pharm 21:594 (1982); Eur J Pharmacol 238:343 (1993); J Chem Soc 1955: 1025; Int J Med Sci 25: 1273 (1979); Trends J Pharmacol Exp Ther 275: 864 (1995) | -1.06                  | -1.39 | -1.71   | -1.15 | -1.33   |
| 05101128    | CAPSACIN                              | 100122-09 | A03      | sample          | 404-86-4                                          | C18H27NO3       | 305.42079  | analgesic (topical), depletes Substance P, neurotoxic | Capiscum spp                   | USP                 |                                                                                                                                                            | -0.51                  | 0.87  | -0.40   | 0.47  | 0.11    |
| 05101130    | FAPIRIDINE                            | 100122-09 | A04      | sample          | 524-24-4                                          | C25H42N2        | 341.1697   | K channel blocker; multiple sclerosis therapy         | synthetic                      | USAN, INN           |                                                                                                                                                            | -1.38                  | -0.47 | -0.34   | -0.47 | -0.33   |
| 05101133    | NICERGOLINE                           | 100122-09 | A05      | sample          | 2748-84-6                                         | C24H26BN3O3     | 484.39712  | vasodilator                                           | synthetic                      | USAN, INN, BAN, JAN |                                                                                                                                                            | -0.89                  | -0.66 | -0.72   | 0.22  | -0.51   |
| 05101152    | SPIPERONE                             | 100122-09 | A06      | sample          | 749-02-0                                          | C23H26FN3O2     | 395.48097  | antipsychotic                                         | synthetic                      | USAN, INN, BAN, JAN |                                                                                                                                                            | -0.07                  | -1.85 | 0.26    | 0.58  | -0.27   |
| 05101176    | ERYTHROMYCIN ESTOLATE                 | 100122-09 | A07      | sample          | 134-36-1, 114-07-8                                | C52H67NO18S     | 1058.41279 | antibacterial                                         | Streptomyces erythrus          | USP, INN, BAN, JAN  |                                                                                                                                                            | -2.45                  | -2.85 | -2.26   | -1.05 | -2.15   |
| 05101179    | ESTRADIOL PROGESTERONE                | 100122-09 | A08      | sample          | 113-38-2                                          | C21H28O3        | 328.45551  | estrogen                                              | NE-XIV, JAN                    | USP, INN, BAN, JAN  |                                                                                                                                                            | 0.17                   | -0.69 | -0.34   | -0.69 | 0.39    |
| 05101182    | ESTRADIOL BENZOATE                    | 100122-09 | A09      | sample          | 50-60-0                                           | C28H28O3        | 376.50011  | estrogen                                              | synthetic                      | USP, INN, BAN, JAN  |                                                                                                                                                            | -0.25                  | -1.25 | -0.41   | -0.60 | -0.50   |
| 05101203    | RETINOL                               | 100122-09 | A10      | sample          | 68-26-8                                           | C20H30O         | 286.416    | vitamin A                                             | fish & liver oils, eggs, milk  | USP, INN, BAN       |                                                                                                                                                            | 2.09                   | -0.92 | 4.16    | -0.14 | 1.30    |
| 05102013    | ISOTRETINOL                           | 100122-09 | A11      | sample          | 4759-48-2                                         | C20H28O2        | 300.44496  | antivitamin A, antineoplastic                         | synthetic                      | USP, INN, BAN       | Science 195: 487 (1977); N Eng J Med 300: 329 (1979)                                                                                                       | 0.27                   | 0.75  | -0.46   | -0.75 | 0.82    |
|             | 0.04% JAK2znhib                       | 100122-09 | A12      | 0.04% jak2znhib |                                                   |                 |            |                                                       |                                |                     |                                                                                                                                                            | -2.73                  | -3.20 | -1.00   | -2.27 | -2.30   |
|             | 0.04% DMSO                            | 100122-09 | B01      | 0.04% dmso      |                                                   |                 |            |                                                       |                                |                     |                                                                                                                                                            | -0.36                  | -1.10 | -0.99   | -0.36 | -0.70   |
| 05102014    | MESNA                                 | 100122-09 | B02      | sample          | 19787-45-4, 3375-50-6 [2-mercaptoethanesulfonate] | C2H4N6NaO3S2    | 164.17815  | mycolytic                                             | synthetic                      | USAN, INN, BAN      |                                                                                                                                                            | -0.33                  | 0.06  | -0.45   | 0.29  | -0.11   |
| 05102016    | TRETINOL                              | 100122-09 | B03      | sample          | 302-79-4                                          | C20H28O2        | 300.44496  | keratolytic                                           | semisynthetic                  | USP, INN, BAN       | Science 195: 487 (1977); N Eng J Med 300: 329 (1979)                                                                                                       | -0.32                  | -0.30 | -0.03   | 0.84  | 0.21    |
| 05102018    | BRETYLIUM TOSYLATE                    | 100122-09 | B04      | sample          | 61-75-6, 59-41-6 [bretyltol]                      | C18H24BN3O3S    | 414.36488  | inhibitor of norepinephrine release                   | synthetic                      | USP, INN, BAN       |                                                                                                                                                            | 0.27                   | 0.28  | 0.15    | 0.96  | 0.41    |
| 05102019    | FOGARNET SODIUM                       | 100122-09 | B05      | sample          | 63585-01-9                                        | C19A30SP        | 191.95135  | antiviral                                             | synthetic                      | USAN, INN, BAN      |                                                                                                                                                            | -0.31                  | -0.75 | -0.18   | 0.68  | -0.14   |
| 05102020    | CEFSULODIN SODIUM                     | 100122-09 | B06      | sample          | 521-52-9, 62587-73-9                              | C22H19NN4NaO8S2 | 554.53653  | antibacterial                                         | semisynthetic                  | USAN, INN, BAN, JAN |                                                                                                                                                            | -0.38                  | -0.58 | -0.35   | -0.70 | -0.44   |
| 05102039    | FOFOMYCIN CALCIUM                     | 100122-09 | B07      | sample          | 26472-47-9, 23112-90-5(acid)                      | C3H5CaO4P       | 176.1247   | antibacterial                                         | Streptomyces spp               | USAN, INN, BAN      |                                                                                                                                                            | 0.59                   | -0.47 | 0.83    | 0.86  | 0.46    |
| 05102041    | CEFAMANDOLE NAFATE                    | 100122-09 | B08      | sample          | 42540-40-9, 34444-01-4                            | C18H17N6NaO6S2  | 512.50714  | antibacterial                                         | semisynthetic                  | USP, INN, BAN       |                                                                                                                                                            | -0.10                  | -1.13 | 0.52    | 0.15  | -0.14   |
| 05102042    | LITHYDRONINE (L-isomer) SODIUM        | 100122-09 | B09      | sample          | 55-06-1, 6993-03-4                                | C18H17NNaNaO4   | 672.86222  | thyroid hormone                                       | synthetic; L-isomer            | USP, INN, JAN       |                                                                                                                                                            | 0.58                   | -0.88 | 2.52    | 0.34  | 0.64    |
| 05102053    | ALRESTATIN                            | 100122-09 | B10      | sample          | 51411-04-2, 51876-97-2                            | C14H9NO4        | 255.23215  | aldose reductase inhibitor                            | synthetic; AY-22284A           | USAN, INN           |                                                                                                                                                            | 0.82                   | -1.11 | 0.72    | -0.12 | 0.08    |
| 05102084    | PROADIFEN HYDROCHLORIDE               | 100122-09 | B11      | sample          | 78997-40-7                                        | C23H32ClNO2     | 398.96999  | cytochrome P450 inhibitor, Ca antagonist              | synthetic; SKF-525A            | USAN, INN           |                                                                                                                                                            | 0.19                   | 0.20  | 1.61    | -0.58 | 0.36    |
|             | 0.04% JAK2znhib                       | 100122-09 | B12      | 0.04% jak2znhib |                                                   |                 |            |                                                       |                                |                     |                                                                                                                                                            | -0.28                  | -3.89 | -1.40   | -1.82 | -1.85   |
|             | 0.04% DMSO                            | 100122-09 | C01      | 0.04% dmso      |                                                   |                 |            |                                                       |                                |                     |                                                                                                                                                            | -0.30                  | -1.29 | -0.30   | -0.82 | -0.67   |
| 05102106    | CARBOPLATIN                           | 100122-09 | C02      | sample          | 41575-94-4                                        | C6H8I2N2O4Pt    | 371.26354  | antineoplastic, convulsant                            | synthetic                      | USP, INN, BAN, JAN  |                                                                                                                                                            | -0.01                  | -1.01 | -0.64   | -0.17 | -0.46   |
| 05102107    | CISPLATIN                             | 100122-09 | C03      | sample          | 15663-27-1                                        | H6O2C2Pt        | 300.05722  | antineoplastic, convulsant                            | synthetic                      | USP, INN, BAN, JAN  |                                                                                                                                                            | -0.81                  | -0.63 | -0.45   | -0.46 | -0.58   |
| 05102109    | ZIDOVUDINE [AZT]                      | 100122-09 | C04      | sample          | 30516-61-1                                        | C10H13N5O4      | 267.24621  | RT transference inhibitor, antiviral                  | synthetic                      | USP, INN, BAN, JAN  |                                                                                                                                                            | 0.17                   | 1.58  | 0.57    | 0.84  | 0.21    |
| 05102111    | AZACITIDINE                           | 100122-09 | C05      | sample          | 320-67-2                                          | C8H12N4O5       | 244.20864  | antineoplastic, pyrimidine antimetabolite             | synthetic; U-18486; NSC-102816 | USAN, INN           |                                                                                                                                                            | 0.82                   | -0.15 | 0.16    | 0.57  | 0.30    |
| 05102112    | CYCLOHEXIMIDE                         | 100122-09 | C06      | sample          | 66-81-9                                           | C15H22NO4       | 281.35486  | protein synthesis inhibitor                           | synthetic                      | USAN, INN           |                                                                                                                                                            | 0.59                   | 0.40  | 4.27    | -0.24 | 1.26    |
| 05102127    | THINAZOLONE                           | 100122-09 | C07      | sample          | 19387-81-8                                        | C8H13N3O4S      | 247.27451  | antiproliferator                                      | synthetic                      | USP, INN, BAN, JAN  |                                                                                                                                                            | -0.07                  | -0.82 | 0.04    | -0.22 | -0.27   |
| 05102150    | CARBODOPA                             | 100122-09 | C08      | sample          | 38821-49-7, 28860-95-9                            | C10H14N2O4      | 238.24303  | decarboxylase inhibitor, antiparkinsonism             | synthetic                      | USP, INN, BAN, JAN  |                                                                                                                                                            | 1.47                   | -0.01 | 0.58    | 0.97  | 0.39    |
| 05102196    | ETHOSUXIMIDE                          | 100122-09 | C09      | sample          | 77-67-8                                           | C7H11NO2        | 141.17122  | anticonvulsant                                        | synthetic                      | USP, INN, BAN, JAN  |                                                                                                                                                            | 2.35                   | -0.83 | 0.42    | -0.20 | 0.44    |
| 05102197    | PIPERIDOLATE HYDROCHLORIDE            | 100122-09 | C10      | sample          | 129-77-1, 82-98-4                                 | C21H26NO2       | 359.89987  | antispasmodic                                         | synthetic                      | USP, INN, BAN, JAN  |                                                                                                                                                            | -0.88                  | -1.95 | 0.18    | -1.61 | -0.06   |
| 05102198    | ANSINDIONE                            | 100122-09 | C11      | sample          | 117-37-3                                          | C18H12O3        | 252.27224  | anticoagulant                                         | synthetic                      | NE-XIII, INN, BAN   |                                                                                                                                                            | -1.32                  | -0.37 | -0.34   | -0.55 | -0.44   |
|             | 0.11% JAK2znhib                       | 100122-09 | C12      | 0.11% jak2znhib |                                                   |                 |            |                                                       |                                |                     |                                                                                                                                                            | -2.77                  | -4.45 | -1.65   | -1.45 | -2.58   |
|             | 0.11% DMSO                            | 100122-09 | D01      | 0.11% dmso      |                                                   |                 |            |                                                       |                                |                     |                                                                                                                                                            | -1.53                  | -0.60 | -2.80   | -1.75 | -1.54   |
| 05102202    | CYCLOSPORINE                          | 100122-09 | D02      | sample          | 59865-13-3                                        | C29H39N7O7      | 1202.64247 | immunosuppressant                                     | Polycycladum inflatum          | USP, INN, BAN, JAN  | Helv Chim Acta 60: 1568 (1977)                                                                                                                             | 1.75                   | 0.41  | 0.60    | -0.84 | 0.48    |
| 05102230    | ASCORBIC ACID                         | 100122-09 | D03      | sample          | 50-81-7                                           | C6H8O6          | 176.12706  | antiscorbutic, antiviral                              | Vitamin C                      | USP, INN, BAN, JAN  |                                                                                                                                                            | 0.32                   | -0.41 | 1.10    | -0.41 | 0.52    |
| 05102254    | MENADIOL                              | 100122-09 | D04      | sample          | 58-27-5                                           | C11H8O2         | 172.18521  | prothrombogenic agent                                 | Asplenium and Juglans spp.     | USP, INN, BAN, JAN  | J Nat Prod 47: 901 (1984)                                                                                                                                  | 0.76                   | -0.31 | -0.38   | -0.18 | -0.13   |
| 05102255    | SALICIN                               | 100122-09 | D05      | sample          | 138-52-3                                          | C13H18O7        | 286.28421  | analgesic, antipyretic                                | Salix spp                      | USP, INN            |                                                                                                                                                            | 2.68                   | 0.17  | 3.27    | -0.09 | 1.51    |
| 05102258    | MONENSIN SODIUM (monensin A is shown) | 100122-09 | D06      | sample          | 22373-12-9                                        | C37H69NaO10     | 690.89846  | antibacterial                                         | Streptomyces cinamomensis      | USP, INN, BAN       | J Am Chem Soc 89: 5737 (1967)                                                                                                                              | 0.77                   | -0.61 | -0.61   | -0.29 | -0.11   |
| 05102260    | ABAMECTIN                             | 100122-09 | D07      | sample          | 65195-65-3                                        | C48H72O14       | 873.10064  | antiparasitic (avermectin A1 is shown)                | Streptomyces avermitilis       | USP, INN, BAN       |                                                                                                                                                            | 1.55                   | 0.20  | 0.27    | 0.93  | 0.74    |
| 05103001    | BENZOIC ACID                          | 100122-09 | D08      | sample          | 65-85-0                                           | C7H6O2          | 122.12467  | antifungal                                            | synthetic                      | USP, INN, BAN       |                                                                                                                                                            | 1.13                   | 1.28  | -0.37   | 1.57  | 0.59    |
| 05103002    | BENZYL BENZOATE                       | 100122-09 | D09      | sample          | 120-61-0                                          | C14H12O2        | 212.2654   | scabicide                                             | synthetic                      | USP, INN, BAN       |                                                                                                                                                            | 0.40                   | -0.76 | -0.40   | -0.72 | 0.22    |
| 05103004    | BENZOYL PEROXIDE                      | 100122-09 | D10      | sample          | 94-36-0                                           | C14H10O4        | 242.2334   | keratolytic                                           | synthetic; NSC-675             | USP                 |                                                                                                                                                            | 1.30                   | 0.39  | 0.37    | -0.25 | 1.20    |
| 05103007    | BETANINE HYDROCHLORIDE                | 100122-09 | D11      | sample          | 590-46-5, 141-58-2 [replaced]                     | C5H12ClNO2      | 153.60889  | antiartherosclerotic, hypolipemic, hepatoprotectant   | widespread in fungi and plants | USP                 |                                                                                                                                                            | 1.57                   | 0.28  | 0.99    | -0.27 | 0.64    |
|             | 0.11% JAK2znhib                       | 100122-09 | D12      | 0.11% jak2znhib |                                                   |                 |            |                                                       |                                |                     |                                                                                                                                                            | -3.07                  | -3.55 | -2.89   | -2.74 | -3.06   |
|             | 0.11% JAK2znhib                       | 100122-09 | E01      | 0.11% jak2znhib |                                                   |                 |            |                                                       |                                |                     |                                                                                                                                                            | -2.93                  | -4.01 | -1.80   | -3.12 | -3.12   |
| 05103009    | BIOTIN                                | 100122-09 | E02      | sample          | 58-85-5                                           | C10H16N2O3S     | 244.31462  | vitamin B complex                                     | Vitamin B complex              | USP, INN, JAN       |                                                                                                                                                            | -0.62                  | -0.80 | -1.67   | 2.40  | -0.17   |
| 05103014    | AKLOMIDE                              | 100122-09 | E03      | sample          | 3011-89-0                                         | C7H5ClNO2       | 200.8525   | antiproliferator, coccoicidostat                      | synthetic                      | USAN, INN, BAN      | JACS 75: 4675 (1953)                                                                                                                                       | 0.04                   | 0.60  | -0.19   | 0.00  | 0.11    |
| 05103018    | NICOTINYL ALCOHOL TARTRATE            | 100122-09 | E04      | sample          | 100-55-0                                          | C10H13NO7       | 259.1781   | vasodilator                                           | synthetic                      | USAN, INN, BAN      |                                                                                                                                                            | 0.04                   | 1.76  | 0.31    | 1.84  | 0.82    |
| 05103059    | FLOXURIDINE                           | 100122-09 | E05      | sample          | 50-91-9                                           | C9H11FN2O5      | 246.19682  | antineoplastic, antimetabolite                        | synthetic                      | USP                 |                                                                                                                                                            | 0.35                   | 0.29  | -0.16   | -0.50 | 0.00    |
| 05103065    | ALTRETAMINE                           | 100122-09 | E06      | sample          | 645-05-6                                          | C9H18N6         | 210.28401  | antineoplastic                                        | synthetic                      | USP, INN, BAN       |                                                                                                                                                            | 0.57                   | -0.36 | -1.11   | 1.16  | 0.07    |
| 05103069    | AMINOPHIPURIC ACID                    | 100122-09 | E07      | sample          | 61-78-4, 94-16-6                                  | C8H10N2O3       | 194.18165  | renal function diagnosis                              | synthetic                      | USP                 |                                                                                                                                                            | -0.58                  | -0.81 | 0.36    | 0.38  | -0.16   |
| 05103070    | MERLOQUINE                            | 100122-09 | E08      | sample          | 5320-10-7                                         | C17H17ClFN2O2   | 414.79124  | antimalarial                                          | synthetic                      | USAN, INN, BAN      |                                                                                                                                                            | -0.32                  | -0.32 | 0.32    | 0.17  | 0.86    |
| 05103073    | ADIPHENINE HYDROCHLORIDE              | 100122-09 | E09      | sample          | 50-42-0, 64-95-9 [adiphenine]                     | C20H26ClNO2     | 347.88872  | muscle relaxant (smooth)                              | synthetic                      | USAN, INN           |                                                                                                                                                            | -0.47                  | 0.74  | -0.07   | -0.48 | -0.07   |
| 05103076    | QUINAPRIL HYDROCHLORIDE               | 100122-09 | E10      | sample          | 82586-55-8, 85441-61-8                            | C29H31ClN3O5    | 474.89922  | antihypertensive, ACE inhibitor                       | synthetic                      | USP, INN, BAN       |                                                                                                                                                            | -8.06                  | -1.88 | -0.42   | -0.39 | -2.69   |
| 05103081    | AMIFOSTINE                            | 100122-09 | E11      | sample          | 20537-65-6                                        | C15H23ClN3PS    | 341.5H2033 | radioprotectant                                       | synthetic                      | USP, INN, BAN       |                                                                                                                                                            | -0.61                  | 0.14  | 0.69    | -0.16 | 0.23    |
|             | 0.11% DMSO                            | 100122-09 | E12      | 0.11% dmso      |                                                   |                 |            |                                                       |                                |                     |                                                                                                                                                            | -0.60                  | -1.08 | -0.22   | -2.19 | -1.02   |
|             | 0.11% JAK2znhib                       | 100122-09 | F01      | 0.11% jak2znhib |                                                   |                 |            |                                                       |                                |                     |                                                                                                                                                            | -3.11                  | -0.20 | -2.56   | -3.19 | -2.29   |
| 05103083    | AMPIROXILE                            | 100122-09 | F02      | sample          | 58524-20-5, 60414-06-4                            | C14H26ClNO6     | 341.83536  | immunomodulator, antiflammatory                       | semisynthetic                  | USAN, INN           |                                                                                                                                                            | -0.53                  | 0.96  | -0.32   | -0.11 | 0.05    |
| 05103086    | TIAPRIDE HYDROCHLORIDE                | 100122-09 | F03      | sample          | 51012-32-9                                        | C19H25ClNO4S    | 364.8945   | neuroleptic                                           | synthetic                      | USAN, INN, BAN      |                                                                                                                                                            | -0.17                  | 2.84  | -1.28   | -0.07 | 0.33    |
| 05103102    | BACAMPICILLIN HYDROCHLORIDE           | 100122-09 | F04      | sample          | 37661-08-8, 50972-17-3                            | C21H26ClNO7S    | 501.99021  | antibacterial                                         | synthetic                      | USP, INN, BAN, JAN  |                                                                                                                                                            | -0.02                  | 0.93  | -0.52   | 1.26  | 0.41    |
| 05103104    | BENDROFLUMETHIAZIDE                   | 100122-09 | F05      | sample          | 73-46-3                                           | C18H14FN3O4S2   | 418.14739  | diuretic, antihypertensive                            | synthetic                      | USP, INN, BAN, JAN  |                                                                                                                                                            | 0.51                   | 0.99  | -0.80   | -0.45 | 0.06    |
| 05103106    | BEPRIDIL HYDROCHLORIDE                | 100122-09 | F06      | sample          | 74754-02-0                                        | C24H18ClNO2     | 403.01235  | antianxiety agent                                     | synthetic; CERMA-1978          | USAN, INN, BAN, JAN |                                                                                                                                                            | -0.56                  | -0.76 | -0.76</ |       |         |

| Compound ID | MoNAme                           | plate     | position | Content        | cas#                           | Formula        | MoWT      | Bioactivity                                            | Source                                     | Status                                                | Reference                                             | Screen Score (z-score) |       |       |       |       | Average |
|-------------|----------------------------------|-----------|----------|----------------|--------------------------------|----------------|-----------|--------------------------------------------------------|--------------------------------------------|-------------------------------------------------------|-------------------------------------------------------|------------------------|-------|-------|-------|-------|---------|
|             |                                  |           |          |                |                                |                |           |                                                        |                                            |                                                       |                                                       | rep1                   | rep2  | rep3  | rep4  |       |         |
| 01503301    | SULFANILATE ZINC                 | 100122-10 | C06      | sample         | 31884-76-1                     | C12H12N2O8S2Zn | 409.73724 | antibacterial                                          | synthetic                                  | USAN                                                  |                                                       | -0.31                  | 0.22  | 0.32  | 1.37  | 0.40  |         |
| 01503304    | URETHANE                         | 100122-10 | C07      | sample         | 51-79-6                        | C3H7NO2        | 89.09474  | antineoplastic, cytotoxic                              | synthetic                                  | NF-XII, INN                                           |                                                       | -0.47                  | 0.27  | 0.34  | 0.04  | 0.05  |         |
| 01503322    | THRAM                            | 100122-10 | C08      | sample         | 137-26-8                       | C6H12N2S4      | 240.43194 | antifungal                                             | synthetic                                  | USAN                                                  |                                                       | -3.80                  | -5.76 | -2.37 | -5.84 | -4.44 |         |
| 01503324    | THIOTEPA                         | 100122-10 | C09      | sample         | 52-24-4                        | C8H12N2PS      | 189.20044 | antineoplastic, alkylating agent                       | synthetic                                  | USP, INN, BAN, JAN                                    |                                                       | 1.09                   | 0.31  | 0.78  | 0.21  | 1.24  |         |
| 01503330    | TETROQUINONE                     | 100122-10 | C10      | sample         | 319-89-1                       | C6H4O6         | 172.05018 | keratolytic                                            | synthetic                                  | USAN, INN                                             |                                                       | 1.78                   | -0.17 | 0.26  | -0.61 | 0.31  |         |
| 01503339    | SULFANITRAN                      | 100122-10 | C11      | sample         | 122-16-7                       | C14H13N3O5S    | 335.34081 | antibacterial                                          | synthetic                                  | USAN, INN, BAN                                        |                                                       | -0.56                  | -1.07 | -0.74 | -0.57 | -0.73 |         |
| 01503341    | 0.11% JAK2zhnb                   | 100122-10 | C12      | 0.11% jak2zhnb |                                |                |           |                                                        |                                            |                                                       |                                                       | -1.54                  | -0.49 | -0.61 | -1.85 | -0.64 |         |
| 01503373    | OXIBENDAZOLE                     | 100122-10 | D02      | sample         |                                |                |           |                                                        |                                            |                                                       |                                                       | -1.89                  | -1.49 | -3.03 | -0.89 | -1.83 |         |
| 01503383    | PIPOBROMAN                       | 100122-10 | D03      | sample         | 54-91-1                        | C10H16Br2N2O2  | 249.27165 | antelmintic                                            | synthetic                                  | USAN, INN, BAN                                        | Am J Vet Res 38:809 (1977); J Parasitol 66:929 (1980) | 1.31                   | 0.03  | 1.04  | 1.25  | 0.91  |         |
| 01503412    | ETANACZOLIN                      | 100122-10 | D04      | sample         | 22688-01-5                     | C7H10N4O4      | 356.05922 | antineoplastic, alkylating agent                       | synthetic                                  | USP-XVII, INN                                         |                                                       | 1.20                   | 0.27  | -0.12 | 5.49  | 1.71  |         |
| 01503419    | NAFRONYL OXALATE                 | 100122-10 | D05      | sample         | 3209-06-4, 31329-57-9          | C21H35NO7      | 214.12515 | antineoplastic, hypoxic cell radiosensitizer           | synthetic                                  | USAN, INN, BAN                                        |                                                       | 0.17                   | 2.64  | 0.37  | 0.53  | 0.87  |         |
| 01503420    | QUIPazine MALEATE                | 100122-10 | D06      | sample         | 5786-68-5, 4774-24-7           | C17H19N3O4     | 329.35868 | antidepressant, oxytocic                               | synthetic                                  | USAN, INN                                             |                                                       | 0.76                   | -0.03 | -0.37 | 5.43  | 1.45  |         |
| 01503421    | RITAFERMIN                       | 100122-10 | D07      | sample         | 8705-12-1                      | C27H29F2N3O5S  | 477.58054 | antineoplastic                                         | synthetic                                  | USAN, INN                                             |                                                       | 0.17                   | 0.31  | 0.26  | 0.31  | 0.26  |         |
| 01503422    | SEMUSTINE                        | 100122-10 | D08      | sample         | 13909-09-9                     | C10H18ClN3O2   | 247.72686 | antineoplastic                                         | synthetic                                  | USAN, INN                                             |                                                       | 0.47                   | -4.90 | 1.18  | 0.26  | 1.70  |         |
| 01503423    | SPRAMYCIN                        | 100122-10 | D09      | sample         | 8025-81-8                      | C43H74N2O14    | 843.07423 | antibacterial                                          | Streptomycins antibiotics                  |                                                       | J Am Chem Soc 91: 3401 (1969)                         | 1.36                   | 0.31  | 0.96  | -0.05 | 0.65  |         |
| 01503429    | CLOPBRATE                        | 100122-10 | D10      | sample         | 637-07-0                       | C12H15ClO3     | 242.74585 | antihyperlipidemic                                     | synthetic                                  | USP, INN, BAN, JAN                                    |                                                       | 1.07                   | 0.05  | -0.75 | -0.51 | -0.04 |         |
| 01503500    | RESORCINOL MONOCACETATE          | 100122-10 | D11      | sample         | 102-29-4                       | C8H6O3         | 152.15116 | anticoagulant, antipruritic                            | USP                                        |                                                       |                                                       | 0.93                   | 0.21  | -1.41 | -0.48 | 0.52  |         |
| 01503510    | 0.11% JAK2zhnb                   | 100122-10 | D12      | 0.11% jak2zhnb |                                |                |           |                                                        |                                            |                                                       |                                                       | -2.00                  | -4.27 | 0.63  | -4.22 | -2.47 |         |
| 01503511    | 0.11% JAK2zhnb                   | 100122-10 | E01      | 0.11% jak2zhnb |                                |                |           |                                                        |                                            |                                                       |                                                       | -3.67                  | -3.71 | -3.71 | -1.88 | -3.07 |         |
| 01503600    | NIMODIPINE                       | 100122-10 | E02      | sample         | 66085-59-4                     | C21H26N2O7     | 418.45057 | vasodilator                                            | synthetic                                  | USP, INN, BAN                                         |                                                       | -0.68                  | -1.50 | -3.05 | -1.18 | -1.60 |         |
| 01503603    | ACYCLOVIR                        | 100122-10 | E03      | sample         | 59277-89-3                     | C8H11N5O3      | 225.20857 | antiviral                                              | synthetic                                  | USP, INN, BAN, JAN                                    |                                                       | -0.27                  | 0.41  | -0.71 | 1.48  | 0.23  |         |
| 01503604    | RETINYL PALMITATE                | 100122-10 | E04      | sample         | 79-81-2                        | C38H66O2       | 524.8784  | provitamin, antioxerophthalmic                         | semisynthetic; Vitamin A palmitate         | USP, JAN                                              |                                                       | -9.56                  | -0.62 | -0.83 | -0.54 | -2.88 |         |
| 01503607    | THALDOMIDE                       | 100122-10 | E05      | sample         | 52-35-1                        | C13H19NO2O4    | 258.25555 | hypnotic                                               | synthetic                                  | USP, INN, BAN                                         |                                                       | -0.50                  | 0.35  | 0.29  | 1.01  | 0.29  |         |
| 01503609    | NITRENDIPINE                     | 100122-10 | E06      | sample         | 84845-75-0                     | C18H20N2O6     | 360.3699  | antihypertensive                                       | synthetic                                  | USAN, INN, BAN, JAN                                   |                                                       | -0.55                  | -0.49 | -0.44 | -0.36 | -0.24 |         |
| 01503610    | BENZALKONIUM CHLORIDE            | 100122-10 | E07      | sample         | 8001-54-5                      | C22H40ClN      | 354.0238  | antinfedive (topical)                                  | synthetic                                  | USAN, NF, INN, BAN, JAN                               |                                                       | -0.69                  | -0.28 | 1.67  | 2.80  | 1.22  |         |
| 01503614    | CIRPFOLOXACIN                    | 100122-10 | E08      | sample         | 85721-33-1                     | C17H18FN3O3S   | 334.34971 | antibacterial, fungicide                               | synthetic                                  | USP, INN, BAN                                         |                                                       | 2.61                   | 1.73  | 0.11  | 0.22  | 1.17  |         |
| 01503678    | CELECOXIB                        | 100122-10 | E09      | sample         | 16589-01-5                     | C17H14F3N3O2S  | 331.37823 | antiarthritic, cyclooxygenase2 inhibitor               | synthetic                                  | USP, INN, BAN                                         |                                                       | -0.17                  | -0.12 | -0.62 | -0.50 | -0.22 |         |
| 01503679    | AZITHROMYCIN                     | 100122-10 | E10      | sample         | 83905-01-5, 117772-70-0        | C38H77N2O12    | 740.0374  | antibacterial                                          | semisynthetic                              | USP, INN, BAN                                         |                                                       | -6.05                  | 1.15  | 0.39  | 0.66  | -1.21 |         |
| 01503705    | ANETHOLE                         | 100122-10 | E11      | sample         | 4180-23-8                      | C10H12O        | 148.20654 | expectorant, gastric stimulant, insecticide            | anise, fennel and other plant oils         | USAN, NF                                              |                                                       | -5.60                  | -1.20 | -0.80 | -0.13 | -1.93 |         |
| 01503706    | 0.11% JAK2zhnb                   | 100122-10 | E12      | 0.11% jak2zhnb |                                |                |           |                                                        |                                            |                                                       |                                                       | -1.67                  | -1.18 | -1.18 | -0.92 | -0.82 |         |
| 01503708    | TERFENADINE                      | 100122-10 | F02      | sample         | 50679-08-8                     | C23H24ClN2O2   | 471.68907 | H1 antihistamine, nonседating                          | synthetic                                  | USP XXII, INN, BAN, JAN                               |                                                       | -5.66                  | -2.37 | -2.45 | 3.21  | -1.82 |         |
| 01503710    | CLORODIGREL SULFATE              | 100122-10 | F03      | sample         | 113665-84-2                    | C18H18ClN2O6S2 | 419.85956 | platelet aggregation inhibitor                         | synthetic                                  | USP, INN, BAN                                         |                                                       | -3.36                  | 0.38  | -1.23 | -0.65 | -1.12 |         |
| 01503712    | LORAPIDINE                       | 100122-10 | F04      | sample         | 79794-75-5                     | C22H22ClN2O2   | 352.89381 | H1 antihistamine                                       | synthetic                                  | USP, INN, BAN                                         |                                                       | -0.29                  | 0.25  | 0.19  | 0.25  | 0.14  |         |
| 01503720    | SELALECTIN                       | 100122-10 | F05      | sample         | 165108-07-6                    | C43H63N5O2     | 769.98166 | antiparasitic, antileish                               | semisynthetic                              | USAN, INN                                             |                                                       | -0.25                  | 1.15  | -0.77 | 0.42  | 0.14  |         |
| 01503801    | NAPROXOL                         | 100122-10 | F06      | sample         | 26159-36-4                     | C14H16O2       | 216.28242 | antirheumatic, analgesic, antipyretic                  | synthetic                                  | USAN, INN                                             |                                                       | -6.01                  | 1.73  | 0.11  | 0.22  | 1.17  |         |
| 01503804    | COLFORSIN                        | 100122-10 | F07      | sample         | 66575-23-9                     | C15H15N3O7S    | 410.51208 | adenylyl cyclase activator, antidiarrhoea, hypotensive | USAN, USFDA, korakohli, HL-362, L-75-162B  | J Biol Chem 258:2960 (1983); J Med Chem 26:436, 486   |                                                       | -0.22                  | -1.11 | -2.34 | -1.75 | -0.44 |         |
| 01503807    | ISOSORBIDE MONONITRATE           | 100122-10 | F08      | sample         | 16051-77-7                     | C6H9NO6        | 191.14173 | antitanginal                                           | semisynthetic; BM-22145, IS-5-MN, AHR-4698 | USAN, INN, BAN, JAN                                   |                                                       | 0.30                   | -0.08 | -0.36 | 0.03  | -0.03 |         |
| 01503816    | AMCINONIDE                       | 100122-10 | F09      | sample         | 51022-69-6                     | C38H59FO7      | 502.58533 | glucocorticoid, antinflammatory                        | USP, INN, BAN                              |                                                       | 0.20                                                  | 0.66                   | -0.16 | -0.17 | 0.13  |       |         |
| 01503818    | BUPIVACAINE HYDROCHLORIDE        | 100122-10 | F10      | sample         | 14253-30-5, 2180-92-9          | C24H28ClNO2    | 324.58732 | anesthetic (local)                                     | USP, INN, BAN, JAN                         |                                                       | 1.04                                                  | -1.45                  | -0.06 | -1.09 | -0.39 |       |         |
| 01503903    | ALBENDAZOLE                      | 100122-10 | F11      | sample         | 54665-21-8                     | C12H15N3O2S    | 265.33625 | antelmintic                                            | synthetic                                  | USP                                                   |                                                       | 0.18                   | 0.28  | 0.18  | 0.28  | 0.18  |         |
| 01503904    | 0.04% JAK2zhnb                   | 100122-10 | F12      | 0.04% jak2zhnb |                                |                |           |                                                        |                                            |                                                       |                                                       | -0.02                  | -1.37 | 2.92  | -1.35 | 0.04  |         |
| 01503908    | PACUTAXEL                        | 100122-10 | G01      | 0.04% jak2zhnb |                                |                |           |                                                        |                                            |                                                       |                                                       | -2.91                  | -2.24 | -3.23 | -3.24 | -2.90 |         |
| 01503914    | BUTACANE                         | 100122-10 | G02      | sample         | 33069-62-4                     | C47H51NO14     | 853.92882 | antineoplastic (anticancer)                            | Taxus brevifolia                           | USP, INN, BAN                                         | J Am Chem Soc 93: 2325 (1971)                         | -3.92                  | -4.85 | -4.08 | -4.45 | -4.19 |         |
| 01503918    | CLOBETASOL PROPIONATE            | 100122-10 | G04      | sample         | 149-15-5, 140-16-6 (butacaine) | C18H26NO2      | 306.452   | anesthetic (local)                                     | USP, INN, BAN                              |                                                       | -0.33                                                 | -1.25                  | -2.10 | -1.12 | -1.20 |       |         |
| 01503918    | CLOBETASOL PROPIONATE            | 100122-10 | G04      | sample         | 25122-46-7, 25122-41-2         | C28H32ClF2O5   | 466.98219 | glucocorticoid, antinflammatory                        | synthetic                                  | USP, INN, BAN, JAN                                    |                                                       | 0.03                   | 0.62  | 0.02  | 1.47  | 0.54  |         |
| 01503923    | OPANCACIN                        | 100122-10 | G05      | sample         | 96-83-3                        | C11H12N2O2     | 208.22822 | antidyspeptic agent                                    | synthetic                                  | USP, INN, BAN                                         |                                                       | 0.20                   | 0.27  | 0.20  | 1.73  | 1.27  |         |
| 01503925    | KETOROLAC TROMETHAMINE           | 100122-10 | G06      | sample         | 74103-07-4, 74103-06-3         | C19H24N2O4     | 376.41293 | antianflammatory                                       | synthetic                                  | USP, INN, BAN                                         |                                                       | 0.44                   | 0.13  | -0.83 | -0.79 | -0.26 |         |
| 01503926    | LANSOPRAZOLE                     | 100122-10 | G07      | sample         | 103577-45-3                    | C16H14F3N3O2S  | 369.36808 | antitumor, proton pump inhibitor                       | synthetic                                  | USP, INN, BAN                                         |                                                       | 0.27                   | -0.28 | 0.28  | 0.70  | 0.24  |         |
| 01503928    | MEXILETINE HYDROCHLORIDE         | 100122-10 | G08      | sample         | 5370-01-4, 31828-71-4          | C11H18ClNO     | 215.72221 | antitumor                                              | synthetic                                  | USP, INN, BAN, JAN                                    |                                                       | 0.85                   | 0.10  | 0.12  | 0.00  | -0.10 |         |
| 01503931    | MORANTERIL CITRATE               | 100122-10 | G09      | sample         | 26155-17-1, 20574-50-9         | C12H18N2O7S    | 412.46519 | antelmintic                                            | synthetic                                  | USP, INN, BAN                                         |                                                       | 0.12                   | 0.31  | -0.41 | -0.17 | 0.27  |         |
| 01503934    | PERPHENAZINE                     | 100122-10 | G10      | sample         | 58-39-9                        | C12H16ClN3O3S  | 403.97787 | antipsychotic                                          | synthetic                                  | USP, INN, BAN, JAN                                    |                                                       | 1.42                   | 0.04  | 0.80  | -0.59 | 0.44  |         |
| 01503938    | RIBAVIRIN                        | 100122-10 | G11      | sample         | 36791-04-5                     | C8H12N4O5      | 244.20864 | antiviral                                              | synthetic                                  | USP, INN, BAN                                         |                                                       | 1.10                   | -0.34 | 1.33  | -0.74 | 0.34  |         |
| 01503940    | 0.04% JAK2zhnb                   | 100122-10 | G12      | 0.04% jak2zhnb |                                |                |           |                                                        |                                            |                                                       |                                                       | -0.38                  | -0.47 | -0.37 | -1.21 | -0.38 |         |
| 01503942    | 0.04% JAK2zhnb                   | 100122-10 | H01      | 0.04% jak2zhnb |                                |                |           |                                                        |                                            |                                                       |                                                       | 1.20                   | -1.88 | -2.57 | 1.26  | -0.50 |         |
| 01503968    | TACROLIMUS                       | 100122-10 | H02      | sample         | 109581-93-3, 104987-11-3       | C44H69NO12     | 804.04003 | immune suppressant, antifungal                         | Streptomycetes tsukubaensis                | USAN, INN, BAN, JAN                                   |                                                       | -9.14                  | -3.31 | -3.47 | -2.82 | -4.68 |         |
| 01503985    | BROMPHENIRAMINE MALEATE          | 100122-10 | H03      | sample         | 980-71-2, 86-22-6              | C22H28BrN2O4   | 453.32131 | H1 antihistamine                                       | synthetic                                  | USP, INN, BAN                                         |                                                       | -1.58                  | -0.42 | -0.82 | -0.62 | -0.86 |         |
| 01504008    | SICLOMILUS                       | 100122-10 | H04      | sample         | 53723-88-9                     | C51H79NO13     | 914.19710 | immunosuppressant, antineoplastic, rapamycin           | Streptomycetes hygroscopicus               | USP, INN, BAN                                         |                                                       | 0.17                   | 0.23  | 0.17  | 0.38  | 0.28  |         |
| 01504085    | PAROXETINE HYDROCHLORIDE         | 100122-10 | H05      | sample         | 81869-08-7                     | C19H21ClF3NO3  | 365.83552 | antidepressant                                         | synthetic                                  | USP, INN, BAN                                         |                                                       | -6.61                  | -1.28 | -0.79 | -1.44 | -2.53 |         |
| 01504088    | ETHYLONOREPHEDRINE HYDROCHLORIDE | 100122-10 | H06      | sample         | 3198-07-0, 536-24-3            | C10H16ClNO3    | 233.69692 | bronchodilator                                         | synthetic                                  | USP-XVII, INN                                         |                                                       | 0.01                   | 0.87  | -0.29 | 0.37  | 0.24  |         |
| 01504136    | ALPROCLATE                       | 100122-10 | H07      | sample         | 607-18-5-3                     | C15H16ClNO2    | 255.74681 | antidepressant                                         | synthetic                                  | USP, INN                                              |                                                       | -0.35                  | 0.48  | -0.48 | 3.63  | 1.44  |         |
| 01504142    | ACETIRACIZOLIC ACID              | 100122-10 | H08      | sample         | 85-36-9, 129-63-5 (acetate)    | C9H9ClNO3      | 556.86627 | X-ray contrast medium                                  | USP                                        | JACS 74: 4365 (1952); J Pharmacol Exp Therap 116: 394 |                                                       | -0.13                  | 0.16  | -0.02 | 0.00  | 0.00  |         |
| 01504171    | VENLAFAXINE                      | 100122-10 | H09      | sample         | 99300-78-4, 93413-69-5         | C17H27NO2      | 277.41024 | antidepressant                                         | synthetic                                  | USAN, INN, BAN                                        |                                                       | -0.93                  | 0.62  | 1.23  | -0.78 | 0.04  |         |
| 01504172    | CITALOPRAM                       | 100122-10 | H10      | sample         | 59723-33-8                     | C20H21F3NO2    | 324.40157 | antidepressant, 5HT reuptake inhibitor                 | synthetic                                  | USP, INN, BAN                                         |                                                       | 0.20                   | -0.17 | -0.80 | -1.20 | -0.83 |         |
| 01504173    | FLUXETINE                        | 100122-10 | H11      | sample         | 54910-89-3                     | C17H19ClF3NO   | 347.79525 | antidepressant                                         | synthetic                                  | USAN, INN, BAN                                        |                                                       | -0.38                  | 0.98  | 0.14  | -1.13 | -0.25 |         |
| 01504174    | empty                            | 100122-10 | H12      | sample         |                                |                |           |                                                        |                                            |                                                       |                                                       | NA                     | NA    | NA    | NA    | NA    |         |
| 01504174    | empty                            | 100122-11 | A01      | sample         | 31677-53-7, 34911-55-2         | C19H19ClN2O    | 276.20848 | antidepressant                                         | synthetic                                  | USP, INN, BAN                                         |                                                       | NA                     | NA    | NA    | NA    | NA    |         |
| 01504175    | CEFUROXIME AXETIL                | 100122-11 | A02      | sample         | 64544-07-6, 55268-75-2         | C20H24N4O10S   | 510.48314 | antibacterial                                          | synthetic                                  | USP, BAN, JAN                                         |                                                       | -1.08                  | -2.17 | -1.08 | -1.20 | -1.69 |         |
| 01504179    | FEXOFENADINE HYDROCHLORIDE       | 100122-11 | A03      | sample         | 138452-21-8                    | C24H29ClF3NO4  | 538.1329  | non-sedating H1-antihistamine                          | synthetic                                  | USAN, INN, BAN                                        |                                                       | -0.80                  | -1.35 | -2.65 | -0.36 | 0.46  |         |
| 01504183    | TRIFLUOROMETHYLURACIL            | 100122-11 | A04      | sample</       |                                |                |           |                                                        |                                            |                                                       |                                                       |                        |       |       |       |       |         |

|                |                                   |           |     |           |                              |                  |  |           |                                                                       |                                                       |                                                                                                                        |  |                                                          | Screen Score (z-score) |       |       |       |         |
|----------------|-----------------------------------|-----------|-----|-----------|------------------------------|------------------|--|-----------|-----------------------------------------------------------------------|-------------------------------------------------------|------------------------------------------------------------------------------------------------------------------------|--|----------------------------------------------------------|------------------------|-------|-------|-------|---------|
|                |                                   |           |     |           |                              |                  |  |           |                                                                       |                                                       |                                                                                                                        |  |                                                          | rep1                   | rep2  | rep3  | rep4  | Average |
| 01050230       | CLOSTAZOL                         | 100122-11 | F02 | sample    | 73963-72-1                   | C20H27N5O2       |  | 369.47049 | phosphodiesterase inhibitor                                           | synthetic                                             | USAN, INN, BAN, JAN                                                                                                    |  |                                                          | -1.21                  | -2.36 | -0.97 | -0.46 | -1.25   |
| 01050244       | CITICOLINE                        | 100122-11 | F03 | sample    | 987-78-0                     | C14H26NO4N1P2    |  | 488.33112 | cognition enhancer, phosphocholine cytidyltransferase activator       | synthetic                                             | USAN, INN, BAN, JAN                                                                                                    |  |                                                          | -0.13                  | -0.69 | -1.08 | -0.59 | -0.62   |
| 01050249       | APRAMYCIN                         | 100122-11 | F04 | sample    | 37321-09-8                   | C21H44N8O11      |  | 539.58782 | antibacterial, LD50(μg/200mg/kg/mouse)                                | Streptomyces tenebrarius, Saccharomyces porpora hiius | J Neurochem 65: 889 (1996); Neurosci Lett 273: 163 (1999)<br>J Orthog Chem 41: 2087 (1996); JCS 43: 1430 (1978); Eur J |  |                                                          | -0.13                  | 1.49  | -0.46 | 1.25  | 0.54    |
| 01050252       | SERTRALINE HYDROCHLORIDE          | 100122-11 | F05 | sample    | 79559-07-0; 79617-96-2(base) | C17H18ClNO2      |  | 342.68871 | antidepressant, 5HT uptake inhibitor                                  | synthetic                                             | USAN, INN, BAN                                                                                                         |  |                                                          | 1.13                   | 1.10  | 0.53  | 0.80  | 0.89    |
| 01050263       | ALFUZOSIN                         | 100122-11 | F06 | sample    | 81403-80-7                   | C19H27N5O4       |  | 389.45814 | α1-adrenergic blocker                                                 | synthetic; SL-77499                                   | USAN, INN, BAN                                                                                                         |  |                                                          | -6.54                  | 0.37  | -0.27 | 1.58  | -1.22   |
| 01050265       | TELITHROMYCIN                     | 100122-11 | F07 | sample    | 191114-48-4                  | C34H66N8O10      |  | 832.025   | antibacterial                                                         | synthetic; HMR-3647                                   | USAN, INN, BAN                                                                                                         |  |                                                          | -0.50                  | 0.29  | -0.21 | -0.68 | -0.91   |
| 01050267       | OXAPROZIN                         | 100122-11 | F08 | sample    | 21256-31-9                   | C18H25N3O2       |  | 293.35155 | antiflammatory                                                        | synthetic; WY-21743                                   | USP, INN, BAN, JAN                                                                                                     |  |                                                          | 0.82                   | 0.82  | -0.82 | -0.82 | -0.91   |
| 01050296       | OXFENDAZOLE                       | 100122-11 | F09 | sample    | 53716-60-0                   | C15H31N3O3S      |  | 315.35316 | anthelmintic                                                          | synthetic                                             | USP, INN, BAN                                                                                                          |  | Am J Vet Res 38:465 (1977)                               | 0.29                   | -0.28 | -0.27 | -0.92 | -0.30   |
| 01050295       | AMITRAZ                           | 100122-11 | F10 | sample    | 33089-61-1                   | C19H23N3         |  | 293.41526 | scabicide                                                             | synthetic; U-36059                                    | USP, INN, BAN                                                                                                          |  | Toxicol Appl Pharmacol 73:411 (1984); Toxicol Lett 28:99 | 1.26                   | 1.26  | 1.20  | 0.83  | 1.14    |
| 01050305       | PEFLUOXICANE MESYLATE             | 100122-11 | F11 | sample    | 149676-40-4                  | C18H24FN3O6S     |  | 429.47088 | antibacterial, antiproliferative                                      | synthetic                                             | USAN, INN, BAN                                                                                                         |  | J Med Chem 31:221 (1988); J Pharmacol Exp Ther 248:415   | 1.45                   | 3.69  | 2.00  | 5.61  | 3.19    |
| 0.04% DMSO     |                                   |           |     | 100122-11 | F12                          | 0.04% dmso       |  |           |                                                                       |                                                       |                                                                                                                        |  |                                                          | 0.39                   | 1.76  | 0.90  | 1.24  | 1.07    |
| 0.04% JAK2inhb |                                   |           |     | 100122-11 | G01                          | 0.04% jak2inhb   |  |           |                                                                       |                                                       |                                                                                                                        |  |                                                          | -4.63                  | -5.02 | -4.09 | -1.52 | -3.82   |
| 01050308       | CHLOROPHYLLIDE Cu COMPLEX NA SALT | 100122-11 | G02 | sample    | 15611-43-5                   | C34H28CuN4Na2O5  |  | 682.15166 | antineoplastic                                                        | water soluble derivative of chlorophyll               | USP, JAN                                                                                                               |  | Mutat Res 308:191 (1994)                                 | -2.69                  | -1.77 | -1.85 | -0.88 | -1.80   |
| 01050309       | BIFONAZOLE                        | 100122-11 | G03 | sample    | 60628-49-8                   | C12H8Cl2N2O2     |  | 321.18N2  | antifungal, calmodulin antagonist                                     | synthetic                                             | USAN, INN, BAN, JAN                                                                                                    |  | Eur J Pharmacol 313:265 (1996)                           | -0.88                  | -1.47 | -1.44 | -1.26 | -1.26   |
| 01050312       | TYLOSIN TARTRATE                  | 100122-11 | G04 | sample    | 1405-54-5, 1401-69-0(base)   | C46H77NO17       |  | 916.12309 | antibacterial                                                         | Streptomyces fradiae                                  | USAN, INN, BAN                                                                                                         |  | Chem Ber 108:2481 (1975); Infection 5:183 (1977);        | -0.69                  | -0.91 | -1.07 | -0.82 | -0.46   |
| 01050314       | SARAFLOXACIN HYDROCHLORIDE        | 100122-11 | G05 | sample    | 91296-47-8                   | C20H18ClFN2O3    |  | 421.83456 | antibacterial                                                         | synthetic                                             | USAN, INN, BAN                                                                                                         |  | J Med Chem 28:1558 (1985); J Antimicrob Chemother        | 0.75                   | -0.82 | -0.59 | -0.10 | 0.22    |
| 01050319       | CLOPIDOL                          | 100122-11 | G06 | sample    | 2071-96-2                    | C17H22ClNO2      |  | 328.14926 | coccolistat, antiplatelet                                             | synthetic                                             | USAN, INN, BAN                                                                                                         |  | Clin Appl Thromb Hemost 8:169 (2002)                     | 1.09                   | 0.86  | 0.59  | 0.30  | 0.64    |
| 01050327       | CHLORMADINONE ACETATE             | 100122-11 | G07 | sample    | 302-22-7                     | C23H29ClO4       |  | 404.39818 | progestin, androgen                                                   | semisynthetic                                         | USAN, INN, BAN, JAN                                                                                                    |  | Cancer Metastasis Rev 6:615 (1987); Endocrin J 42:505    | -1.64                  | -3.05 | -3.09 | -1.64 | -1.78   |
| 01050330       | OXICANONIC ENITRATE               | 100122-11 | G08 | sample    | 64211-46-7                   | C18H14Cl4N4O4    |  | 492.14868 | antifungal                                                            | synthetic                                             | USAN, INN, BAN, JAN                                                                                                    |  | Azmeintellforsch 32:17 (1992)                            | 0.63                   | 0.20  | 0.36  | 0.70  | 0.33    |
| 01050323       | AZAPERONE                         | 100122-11 | G09 | sample    | 1649-18-9                    | C18H22FN3O       |  | 327.40509 | tranquilizer, neuroleptic, alpha adrenergic blocker                   | synthetic; R-1929                                     | USP, INN, BAN                                                                                                          |  | J Vet Pharmacol Ther 9:164 (1986); Psychopharmacol       | 1.33                   | 0.38  | 0.07  | 0.35  | 0.53    |
| 01050333       | TRANILAST                         | 100122-11 | G10 | sample    | 53902-12-4                   | C18H17NO5        |  | 327.33693 | antiallergic, mast cell degranulation inhibitor, angiogenesis blocker | synthetic; MK-341                                     | USAN, INN, JAN                                                                                                         |  | Br J Pharmacol 118:915 (1996); 122:1061 (1997); Eur J    | 2.34                   | 0.31  | 0.60  | 0.29  | 0.89    |
| 01050340       | AZELASTINE HYDROCHLORIDE          | 100122-11 | G11 | sample    | 58581-89-8                   | C22H25Cl2N3O     |  | 418.37005 | H1 antihistamine (non-sedating), leukotriene synthesis blocker        | synthetic                                             | USAN, INN, BAN, JAN                                                                                                    |  | Int Arch Allergy Appl Immun 83:284 (1987)                | 1.16                   | -0.01 | -0.38 | -2.06 | -0.32   |
| 0.04% DMSO     |                                   |           |     | 100122-11 | G12                          | 0.04% dmso       |  |           |                                                                       |                                                       |                                                                                                                        |  |                                                          | 3.58                   | 1.54  | 1.11  | -0.93 | 1.33    |
| 0.04% JAK2inhb |                                   |           |     | 100122-11 | H01                          | 0.04% jak2inhb   |  |           |                                                                       |                                                       |                                                                                                                        |  |                                                          | -4.05                  | -3.93 | -3.88 | -3.93 | -3.95   |
| 01050346       | KETANSERIN TARTRATE               | 100122-11 | H02 | sample    | 83846-83-7, 74050-98-9(base) | C22H22FN3O3      |  | 395.43754 | 5HT2/5HT1C serotonin antagonist                                       | synthetic; RA1468                                     | USAN, INN, BAN                                                                                                         |  | J Pharmacol Exp Therap 218:217 (1981); Drug Dev Res      | 0.29                   | -1.82 | -0.74 | 0.53  | -0.28   |
| 01050354       | FIPRONIL                          | 100122-11 | H03 | sample    | 120088-37-3                  | C12H4C2Cl2BrN4O5 |  | 473.15228 | GABA C channel agonist, antiparasitic                                 | synthetic; RM-1601, MB-4630                           | USAN, INN, BAN                                                                                                         |  |                                                          | -3.48                  | -1.60 | -0.75 | -0.59 | -1.61   |
| 01050356       | DECOQUINATE                       | 100122-11 | H04 | sample    | 18507-89-6                   | C24H38NO6        |  | 417.55025 | coccolistat                                                           | synthetic; MAB-15497, HC-1528                         | USP, INN, BAN                                                                                                          |  |                                                          | -7.38                  | -2.46 | -0.28 | -0.02 | -2.53   |
| 01050360       | CETOFORTIN PIVOXIL                | 100122-11 | H05 | sample    | 117487-12-4                  | C25H28ClNO7S3    |  | 620.72981 | antibacterial                                                         | semisynthetic                                         | USAN, INN, JAN                                                                                                         |  |                                                          | -1.62                  | -1.28 | -0.81 | 1.42  | -0.57   |
| 01050368       | VALACYCLOVIR HYDROCHLORIDE        | 100122-11 | H06 | sample    | 124832-87-5                  | C13H21ClN6O4     |  | 360.80312 | antiviral                                                             | synthetic; BW-256-UC-8                                | USAN, INN, BAN                                                                                                         |  |                                                          | -6.65                  | -0.82 | -0.63 | 0.26  | -1.59   |
| 01050387       | DULOXETINE HYDROCHLORIDE          | 100122-11 | H07 | sample    | 136434-34-9                  | C18H20ClNO3S     |  | 333.8832  | antidepressant                                                        | synthetic; LY-248686                                  | USAN, INN, BAN                                                                                                         |  |                                                          | 0.53                   | -0.49 | 0.32  | 0.04  | 0.10    |
| 01050390       | NISOLDIPINE                       | 100122-11 | H08 | sample    | 63875-75-0                   | C23H28ClNO4      |  | 428.54404 | vasodilator (coronary)                                                | synthetic; bayk-5552                                  | USAN, INN, BAN, JAN                                                                                                    |  |                                                          | 0.63                   | 0.63  | 0.59  | 0.49  | 0.76    |
| 01050391       | MONTELUKAST SODIUM                | 100122-11 | H09 | sample    | 151767-02-1                  | C34H33ClNNaO3S   |  | 594.15381 | leukotriene antagonist, antiasthmatic                                 | synthetic; MK-476                                     | USAN, INN, BAN                                                                                                         |  |                                                          | -0.49                  | 0.01  | 1.07  | 0.27  | -1.29   |
| 01050410       | BENURESTAT                        | 100122-11 | H10 | sample    | 38274-54-3                   | C9H9ClNO2        |  | 228.63668 | urase inhibitor                                                       | synthetic; EU-2826                                    | USAN, INN                                                                                                              |  |                                                          | 1.39                   | 2.84  | 0.53  | 0.06  | 1.72    |
| 01050411       | BENZOZOLQUINE                     | 100122-11 | H11 | sample    | 86-75-9                      | C16H11NO2        |  | 249.27157 | antitubercle                                                          | synthetic; NSC-3951                                   | USAN, INN                                                                                                              |  |                                                          | 2.09                   | 1.88  | 0.74  | -0.78 | 0.98    |
| empty          |                                   |           |     | 100122-11 | H12                          | empty            |  |           |                                                                       |                                                       |                                                                                                                        |  |                                                          | NA                     | NA    | NA    | NA    | NA      |
| empty          |                                   |           |     | 100122-12 | A01                          | empty            |  |           |                                                                       |                                                       |                                                                                                                        |  |                                                          | NA                     | NA    | NA    | NA    | NA      |
| 01050412       | BISMUTH SUBSALICYLATE             | 100122-12 | A02 | sample    | 14882-18-9                   | C7H5BiO4         |  | 362.0955  | antidiarrheal, antacid, antulcer                                      | synthetic                                             | USP, JAN                                                                                                               |  |                                                          | -0.43                  | -0.77 | -0.50 | -0.47 | -0.54   |
| 01050413       | BENDZOYL PAPS                     | 100122-12 | A03 | sample    | 13898-58-3                   | C17H21NO4        |  | 327.44807 | antibacterial, antifungal, antifolate                                 | synthetic                                             | USP-X-X                                                                                                                |  |                                                          | -0.56                  | -1.81 | -0.56 | -0.15 | -0.73   |
| 01050414       | BROMINDIONE                       | 100122-12 | A04 | sample    | 1146-98-1                    | C15H8BrO2        |  | 301.14178 | anticoagulant                                                         | synthetic                                             | USAN, INN, BAN                                                                                                         |  | Farmacol Ed Sol 10:710 (1955)                            | -0.95                  | -0.83 | -2.14 | 1.86  | -0.51   |
| 01050417       | CAPOBENIC ACID                    | 100122-12 | A05 | sample    | 21434-91-3                   | C18H22NO6        |  | 325.36481 | antimycotic                                                           | synthetic; C-3                                        | USAN, INN                                                                                                              |  |                                                          | -0.25                  | -0.84 | -0.81 | -0.48 | -0.18   |
| 01050425       | ACETOCHOLAMIDE                    | 100122-12 | A06 | sample    | 968-61-0                     | C15H20NO2O3S     |  | 326.40205 | anticholinergic                                                       | synthetic; 33006                                      | USP, INN, BAN, JAN                                                                                                     |  |                                                          | 0.02                   | -1.53 | -1.12 | -1.75 | -1.10   |
| 01050426       | ETHOXZOLAMIDE                     | 100122-12 | A07 | sample    | 452-35-7                     | C9H11NO2S2       |  | 258.31965 | carbonic anhydrase inhibitor, antulcer, antiglaucoma                  | synthetic                                             | USP-X-X                                                                                                                |  |                                                          | 0.58                   | 0.91  | -0.34 | -1.15 | 0.00    |
| 01050429       | FLUCYTOSINE                       | 100122-12 | A08 | sample    | 2022-85-7                    | C4H4FN3O         |  | 120.09438 | antifungal                                                            | synthetic; RO-2-9915                                  | USAN, INN, BAN, JAN                                                                                                    |  |                                                          | -0.77                  | 0.48  | -0.77 | 2.35  | 0.32    |
| 01050432       | FOMEPIZOLE HYDROCHLORIDE          | 100122-12 | A09 | sample    | 56010-888                    | C14H17FN2        |  | 116.56970 | alcohol dehydrogenase inhibitor                                       | synthetic; 4-MP                                       | USAN, INN, BAN                                                                                                         |  |                                                          | 0.61                   | 0.06  | -0.61 | -0.25 | -0.05   |
| 01050433       | GLIPIZIDE                         | 100122-12 | A10 | sample    | 26084-41-7                   | C21H27N5O4S      |  | 445.54444 | antidiabetic                                                          | synthetic; CP-28320, K-4024                           | USP, INN, BAN                                                                                                          |  |                                                          | 0.66                   | 0.90  | -0.54 | -0.89 | -0.03   |
| 01050435       | GUANFACINE                        | 100122-12 | A11 | sample    | 2910-41-2                    | C9H9ClN2O3       |  | 246.07058 | antihypertensive                                                      | synthetic; BS-100-141                                 | USP, INN, BAN, JAN                                                                                                     |  |                                                          | 2.48                   | 0.50  | -0.16 | -0.65 | 0.54    |
| 0.04% JAK2inhb |                                   |           |     | 100122-12 | A12                          | 0.04% jak2inhb   |  |           |                                                                       |                                                       |                                                                                                                        |  |                                                          | -2.58                  | -1.23 | -1.11 | -1.11 | -1.51   |
| 0.04% DMSO     |                                   |           |     | 100122-12 | B01                          | 0.04% dmso       |  |           |                                                                       |                                                       |                                                                                                                        |  |                                                          | 80.46                  | -0.99 | 1.54  | 0.05  | 1.54    |
| 01050436       | D-LACTITOL MONOHYDRATE            | 100122-12 | B02 | sample    | 81025-04-0, 585-86-4         | C12H26O12        |  | 362.33382 | sweetener, treatment of portopneuropathy                              | semisynthetic                                         | USAN, NF, INN, BAN                                                                                                     |  | Zhonghua Yi Xue Za Zhi 55:31 (1995)                      | -0.38                  | -0.54 | -1.79 | 0.78  | -0.78   |
| 01050437       | LEVOCARNITINE                     | 100122-12 | B03 | sample    | 541-15-1                     | C7H15NO3         |  | 161.2025  | cofactor for fatty acid metabolism, replenisher in arterial disease   | semisynthetic                                         | USAN, INN, BAN, JAN                                                                                                    |  |                                                          | -0.11                  |       |       |       |         |

| Compound ID | MoName                         | plate     | position | Content        | cas#                          | Formula         | MoWt       | Bioactivity                                     | Source                                    | Status                  | Reference                                                 | rep1  | rep2  | Screen Score (z-score) | rep4  | Average |
|-------------|--------------------------------|-----------|----------|----------------|-------------------------------|-----------------|------------|-------------------------------------------------|-------------------------------------------|-------------------------|-----------------------------------------------------------|-------|-------|------------------------|-------|---------|
| 01505723    | BETAMETHASONE ACETATE          | 100122-12 | H10      | sample         | 987-24-6                      | C24H31FO6       | 434.50947  | antiinflammatory                                | semisynthetic                             | USP, BAN, JAN           |                                                           | 1.34  | 1.22  | 1.12                   | 1.09  | 1.19    |
| 01505751    | ERYTHROSINE SODIUM empty       | 100122-12 | H11      | sample         | 16423-68-0                    | C20H6H4Na2O5    | 879.86502  | color additive                                  | synthetic                                 | USP-XII                 | JACS 49:1594 (1927); Food Cosmet Toxicol 14:525 (1976)    | 2.54  | 0.22  | 1.95                   | 0.48  | 1.29    |
| 01505724    | empty                          | 100122-12 | H12      | sample         |                               |                 |            |                                                 |                                           |                         |                                                           | NA    | NA    | NA                     | NA    | NA      |
| 01505725    | ISOPHREDONE ACETATE            | 100122-12 | A01      | sample         |                               |                 |            |                                                 |                                           |                         |                                                           | NA    | NA    | NA                     | NA    | NA      |
| 01505726    | BETAMETHASONE SODIUM PHOSPHATE | 100122-13 | A02      | sample         | 338-98-7                      | C23H29FO6       | 420.48238  | antiinflammatory                                | semisynthetic; U-6013                     | USP                     | J Indian Chem Soc 26:130 (1949)                           | 0.60  | 0.80  | -0.82                  | -0.22 | 0.09    |
| 01505727    | MELENGESTROL ACETATE           | 100122-13 | A03      | sample         | 151-73-5                      | C22H28FNazO8P   | 516.1546   | antiinflammatory, glucocorticoid                | semisynthetic                             | USP, BAN, JAN           |                                                           | 1.84  | -1.34 | -1.03                  | 0.31  | -0.05   |
| 01505728    | PHTHALYLSULFACETAMIDE          | 100122-13 | A04      | sample         | 2919-66-6                     | C22H28FNazO8P   | 435.33916  | analgesic, progestin                            | semisynthetic; BDH-1921, 5373, NSC-70968  | USAN, INN, BAN          |                                                           | 0.46  | -0.42 | -0.83                  | -0.42 | -0.46   |
| 01505765    | TRICHLORFON                    | 100122-13 | A05      | sample         | 311-69-1                      | C16H14NzO5S     | 362.36378  | antibacterial                                   | synthetic                                 | NF-XII, BAN             | Biochem Pharmacol 24:177 (1975); Arch Toxicol 41:31       | -0.47 | -0.27 | -0.62                  | -1.59 | -0.74   |
| 01505778    | BEPHENILUM HYDROXYNAPHTHOATE   | 100122-13 | A06      | sample         | 52-68-6                       | C4H8C3O4AP      | 257.43876  | antelmintic                                     | synthetic; Bayer-1359, DETF               | USAN, INN, BAN          |                                                           | -0.79 | -0.72 | 0.04                   | -1.14 | -0.66   |
| 01505779    | DIFERODON CHLORIDE             | 100122-13 | A07      | sample         | 3819-80-6                     | C28H28NzO4      | 443.57483  | antelmintic                                     | synthetic                                 | USP-XII, INN, BAN       | Experientia 30:1265 (1974)                                | -1.21 | 0.01  | -0.41                  | -0.82 | -0.40   |
| 01505777    | DIATIZOLIC ACID                | 100122-13 | A08      | sample         | 537-12-12                     | C22H28CzNzO4S   | 433.83916  | analgesic, anesthetic                           | USP-XIII, INN, BAN                        |                         |                                                           | -0.10 | -0.49 | -0.14                  | -0.50 |         |
| 01505775    | PANTOTHENIC ACID(s) Na salt    | 100122-13 | A09      | sample         | 117-96-4                      | C11H19NzO2      | 613.9185   | radioprotective agent                           | synthetic                                 | USP, BAN, JAN           | Ann Profles Drug Subst 4:137 (1975)                       | -0.45 | -1.20 | 0.72                   | -0.53 | -0.37   |
| 01505716    | DESONIDE                       | 100122-13 | A10      | sample         | 6349-48-3                     | C9H16NzNaO5     | 241.2217   | vitamin B5                                      | rice bran, queen bee jelly                | USP, INN, JAN           | Biophy Res Commun 38:181 (1970)                           | -0.29 | -0.03 | 3.48                   | 0.57  | 0.93    |
| 01505766    | 0.04% JAK2zhnb                 | 100122-13 | A11      | sample         |                               |                 |            |                                                 |                                           |                         |                                                           | -0.13 | -0.82 | -3.05                  | -2.41 | -1.03   |
| 01505763    | 0.04% JAK2zhnb                 | 100122-13 | A12      | 0.04% jak2zhnb |                               |                 |            |                                                 |                                           |                         |                                                           | -1.68 | -2.18 | -2.38                  | -1.07 | -1.83   |
| 01505753    | GLYCOPYRROLATE                 | 100122-13 | B01      | 0.04% dmso     |                               |                 |            |                                                 |                                           |                         |                                                           | -0.59 | -0.74 | -2.58                  | -1.22 | -1.29   |
| 01505756    | ITRACONAZOLE                   | 100122-13 | B02      | sample         | 596-51-0                      | C18H28BzNzO3    | 398.34391  | anticholergic                                   | synthetic; AHR-504                        | USAN, INN, BAN, JAN     | J Pharm Pharmacol 26:352 (1974); Toxicol Appl Pharmacol   | 0.03  | -0.32 | -1.55                  | 3.24  | 0.35    |
| 01505760    | OCTISALATE                     | 100122-13 | B03      | sample         | 84625-61-6                    | C39H38CzNzO4    | 705.65031  | antifungal                                      | synthetic; RS1211                         | USAN, INN, BAN, JAN     |                                                           | -0.57 | 0.24  | 0.34                   | 0.29  | 0.29    |
| 01505763    | RIBOFILAVIN 5-PHOSPHATE SODIUM | 100122-13 | B04      | sample         | 118-60-5                      | C19H22O3        | 250.34079  | sunscreen                                       | synthetic                                 | USP, INN                |                                                           | 0.40  | 0.80  | 0.01                   | 0.69  | 0.48    |
| 01505781    | SELEGILINE HYDROCHLORIDE       | 100122-13 | B05      | sample         | 130-40-5                      | C17H20NzNAO9P   | 478.33395  | vitamin, enzyme cofactor                        | widespread in plants and animals          | USP, JAN                | Helv Chim Acta 35:457 (1952)                              | 1.84  | -0.21 | -1.01                  | -0.42 | 0.05    |
| 01505782    | CEFTAZIDIME                    | 100122-13 | B06      | sample         | 14611-22-3                    | C16H16CzNzO4S   | 318.181CN  | antidepressant, MAO inhibitor, antiparkinsonian | synthetic                                 | USP, INN, BAN           | J Antimicrob Chemother 12(suppl A):1 (1983); Drugs        | -0.01 | -0.45 | 1.93                   | 0.00  | -0.37   |
| 01505805    | GABAPENTIN                     | 100122-13 | B07      | sample         | 72558-82-8                    | C22H28NzO7S2    | 546.58464  | antibacterial                                   | semisynthetic                             | USP, INN, BAN, JAN      |                                                           | -0.77 | -0.67 | 0.74                   | 0.20  | -0.13   |
| 01505819    | ELETNPYRIN HYDROBROMIDE        | 100122-13 | B08      | sample         | 1042-96-3                     | C9H17NO2        | 171.24134  | anticonvulsant                                  | synthetic; C1-945; GOE-3450               | USAN, INN, BAN          |                                                           | -0.72 | 0.12  | 0.84                   | -0.03 | 0.05    |
| 01505851    | ARIPRAZOLE                     | 100122-13 | B09      | sample         | 177334-92-3, 143322-56-       | C22H27BzNzO2S   | 463.44089  | 5-HT1 agonist, anti-migraine                    | synthetic; UK-11664-04                    | USAN, INN, BAN          |                                                           | -4.08 | -1.71 | 0.52                   | 2.39  | -0.72   |
| 01505906    | ZILEUTON                       | 100122-13 | B10      | sample         | 129722-12-9                   | C23H27CzNzO3    | 448.39654  | antipruritic, 5HT2A antagonist                  | synthetic; OPC-14567, OPC-31              | USAN, INN, BAN          | J Med Chem 41:656 (1998); J Clin Psychiatry 63:763        | -7.58 | -2.90 | -0.98                  | -0.76 | -3.06   |
| 01505906    | 0.04% JAK2zhnb                 | 100122-13 | B11      | sample         | 111406-87-9                   | C11H12NzO2S     | 226.29449  | 5-lipoxygenase inhibitor                        | synthetic; Abt-607                        | USP, INN, BAN           |                                                           | 1.24  | -0.73 | 0.53                   | 0.71  | 0.43    |
| 01505907    | 0.04% JAK2zhnb                 | 100122-13 | B12      | 0.04% jak2zhnb |                               |                 |            |                                                 |                                           |                         |                                                           | 0.81  | -3.14 | 0.95                   | -1.03 | -0.60   |
| 01505907    | METHYLPHEIDATE HYDROCHLORIDE   | 100122-13 | C01      | 0.04% dmso     |                               |                 |            |                                                 |                                           |                         |                                                           | -0.59 | -2.73 | 0.50                   | -0.76 | -0.76   |
| 01505943    | RABEPRAZOLE SODIUM             | 100122-13 | C02      | sample         | 298-59-9, 113-45-1(base)      | C14H20CzNzO2    | 269.774    | CNS stimulant                                   | synthetic                                 | USP, INN, BAN, JAN      | Helv Chim Acta 27:1748 (1944); J Pharmacol Exp Therap     | -0.78 | 1.90  | 1.14                   | 1.20  | 0.86    |
| 01505944    | RISEDRONATE SODIUM HYDRATE     | 100122-13 | C03      | sample         | 119796-90-6                   | C18H28NzNAO3S   | 381.4322   | gastric acid secretion inhibitor                | synthetic; LY-307640, E-3810              | USAN, INN, BAN          |                                                           | 0.40  | 0.76  | -0.66                  | -0.70 | -0.05   |
| 01505953    | SUCRALOSE                      | 100122-13 | C04      | sample         | 115436-72-1                   | C17H18NzNAO10P2 | 369.14387  | calcium regulator                               | synthetic; NE-58095                       | USAN                    |                                                           | -3.53 | -4.6  | 3.58                   | -2.42 | 0.25    |
| 01505955    | COLISTIN SULFATE               | 100122-13 | C05      | sample         | 56038-13-2                    | C19H31CzO3S     | 397.63943  | sweetener                                       | semisynthetic                             | NF, BAN                 | Arch Oral Biol 27:693 (1982); Trends Biochem Sci 3:61     | 1.43  | -0.41 | 0.02                   | 0.02  | 0.26    |
| 01505957    | ARSENIC TRIOXIDE               | 100122-13 | C06      | sample         | 1264-72-8                     | C52H116O21S2    | 1351.61534 | antibacterial                                   | Bacillus polymyxa colistinus; polymyxin E | USAN, INN, BAN, JAN     | J Biochem (Tokyo) 54:25, 173, 412 (1963); J Chem Soc      | -0.17 | -0.61 | -1.46                  | -0.20 | -1.61   |
| 01505958    | CLOZAPINE                      | 100122-13 | C07      | sample         | 1327-53-3                     | A46C            | 396.8628   | antipsychotic, antileukemia                     | mineral                                   | USAN, JAN               | Biomed Chem 76:141 (1997); Blood 83:268 (1999); N         | 0.59  | -0.44 | -0.48                  | 0.22  | 0.21    |
| 01505971    | BENZBROMARONE                  | 100122-13 | C08      | sample         | 1622-61-3                     | C19H17CzNzO3S   | 315.17623  | anticonvulsant, sedative                        | C19H17CzNzO3S                             | USAN, INN, BAN          | Pediatr Neurol 9:465 (1993); J Forensic Sci 40:332 (1995) | -7.28 | -0.72 | -0.72                  | -1.03 | -0.72   |
| 01505972    | BROMPERIDOL                    | 100122-13 | C09      | sample         | 119796-90-6                   | C17H12BzO3      | 424.0193   | urokinase                                       | synthetic; MJ-10061, L-2214               | USAN, INN, BAN          |                                                           | -1.62 | 0.00  | 0.08                   | -0.64 | -0.29   |
| 01505973    | CYPROHEPTADINE HYDROCHLORIDE   | 100122-13 | C10      | sample         | 10457-90-6                    | C21H28BzFNO2    | 420.23258  | antipsychotic                                   | synthetic; R-11333                        | USAN, INN, BAN, JAN     |                                                           | 0.19  | 0.13  | 0.37                   | 0.30  | 0.92    |
| 01505973    | 0.11% JAK2zhnb                 | 100122-13 | C11      | sample         | 41354-24-2                    | C21H22CzN       | 328.89119  | 1H-antistamine, antipruritic                    | synthetic                                 | USP, INN, BAN           |                                                           | -2.01 | -2.01 | 0.54                   | 1.77  | -0.45   |
| 01505974    | 0.11% JAK2zhnb                 | 100122-13 | C12      | 0.11% jak2zhnb |                               |                 |            |                                                 |                                           |                         |                                                           | -0.04 | -0.47 | -0.73                  | -3.66 | -1.86   |
| 01505974    | CLOPAZINE                      | 100122-13 | D01      | 0.11% dmso     |                               |                 |            |                                                 |                                           |                         |                                                           | -1.62 | -1.66 | -2.50                  | -2.23 | -2.00   |
| 01505975    | BENZDIAZEPINE HYDROCHLORIDE    | 100122-13 | D02      | sample         | 2030-63-9                     | C27H22CzNz      | 473.40919  | antibacterial, antiepileptic, antituberculosis  | synthetic; SC-141046; G-30320             | USP, INN, BAN           |                                                           | 7.98  | 1.62  | -0.77                  | 5.31  | 1.73    |
| 01505976    | DOXAZOSIN MESYLATE             | 100122-13 | D03      | sample         | 132-69-4                      | C19H24CzNzO3    | 345.97953  | analgesic, antipyretic, antiinflammatory        | synthetic; AF-864                         | USAN, INN, BAN, JAN     |                                                           | -1.23 | 2.78  | -1.33                  | 3.98  | 1.00    |
| 01505977    | ISOTHERMALINE MESYLATE         | 100122-13 | D04      | sample         | 77883-43-3                    | C24H28NzO5S     | 547.59143  | antipertensive                                  | synthetic; UK-33274-27                    | USAN, INN, BAN, JAN     |                                                           | 2.46  | 0.09  | -1.52                  | 2.32  | 0.84    |
| 01505979    | FLORENCE                       | 100122-13 | D05      | sample         | 7279-75-6                     | C18H28NzO6S     | 335.42245  | bronchodilator                                  | synthetic                                 | USP                     |                                                           | 0.18  | -0.31 | 0.50                   | -0.03 | -0.01   |
| 01505979    | ETHYNYDIOL DIACETATE           | 100122-13 | D06      | sample         | 76639-44-9                    | C12H14CzO2      | 228.21632  | antibacterial                                   | synthetic; SC-25298                       | USAN, INN, BAN          |                                                           | 0.16  | 0.77  | -0.66                  | -0.40 | -0.07   |
| 01505981    | ORNIDAZOLE                     | 100122-13 | D07      | sample         | 297-76-7                      | C24H32O4        | 334.52024  | progestin                                       | synthetic; SC-11800                       | USAN, INN, BAN, JAN     |                                                           | -0.33 | -0.29 | -0.42                  | -0.73 | -0.28   |
| 01505982    | OXANTHEL PAKOATE               | 100122-13 | D08      | sample         | 16773-42-5                    | C7H10CzNzO3S    | 219.62905  | antitubercle                                    | synthetic; 16773-42-5                     | USAN, INN               |                                                           | 0.82  | 0.42  | 0.42                   | -0.49 | 0.29    |
| 01505984    | PROPRYTYLINE HYDROCHLORIDE     | 100122-13 | D09      | sample         | 688-24-3                      | C9H8BzNzO3      | 694.86520  | antitubercle                                    | synthetic; CP-14445-16                    | USAN, INN, BAN          |                                                           | 0.83  | 0.79  | 0.33                   | 1.68  | 0.63    |
| 01505485    | PHYTONADIONE                   | 100122-13 | D10      | sample         | 1225-54-4                     | C19H22CzN       | 299.84689  | antidepressant                                  | synthetic; MK-240                         | USP, INN, BAN           | J Med Chem 11:325 (1968); N Engl J Med 307:1037 (1982)    | -0.86 | -0.55 | 0.13                   | -0.48 | -0.44   |
| 01505485    | 0.11% JAK2zhnb                 | 100122-13 | D11      | sample         | 84-80-0                       | C31H46O2        | 460.71107  | vitamin                                         | semisynthetic                             | USP, INN, BAN           |                                                           | -4.03 | -1.53 | 0.48                   | -0.82 | -1.47   |
| 01505485    | 0.11% JAK2zhnb                 | 100122-13 | D12      | 0.11% jak2zhnb |                               |                 |            |                                                 |                                           |                         |                                                           | -1.96 | -2.90 | -2.01                  | -2.28 | -2.29   |
| 01505987    | DENATONIUM BENZOATE            | 100122-13 | E01      | 0.11% jak2zhnb |                               |                 |            |                                                 |                                           |                         |                                                           | 0.15  | -3.64 | -5.68                  | -2.56 | -2.45   |
| 01505993    | MESALAMINE                     | 100122-13 | E02      | sample         | 3734-33-6                     | C28H34NzO3      | 446.59478  | denaturing agent, bitter principle              | synthetic                                 | USAN, NF, INN, BAN      | Chem Ind 22:721 (1988)                                    | -0.07 | -0.28 | 0.99                   | 0.44  | 0.41    |
| 01505994    | ETHAMINUM                      | 100122-13 | E03      | sample         | 89-67-2                       | C7H17NO3        | 153.13874  | antiinflammatory                                | synthetic; 5-ASA                          | USAN, INN, BAN          | Gastroenterology 83:1062 (1982); Am J Gastroenterol       | -0.19 | -0.86 | -1.16                  | -0.53 | -0.69   |
| 01505996    | AZTREONAM                      | 100122-13 | E04      | sample         | 324-84-7                      | C12H17NzO3S     | 223.74193  | CNS & respiratory stimulant                     | synthetic; NCS-480687                     | USAN, USP-X, INN, BAN   | Compt Rendu 243:509 (1956)                                | 0.42  | 0.52  | 0.29                   | 0.17  | 0.44    |
| 01506053    | TYLOXAPOL                      | 100122-13 | E05      | sample         | 78110-38-0                    | C13H21NzO7S2    | 423.46962  | antibacterial                                   | synthetic; SQ-26776                       | USPPX11, USAN, INN, BAN |                                                           | 0.52  | 1.23  | 0.32                   | -0.46 | 0.40    |
| 01506002    | THIAMYLAL SODIUM               | 100122-13 | E06      | sample         | 25301-02-4                    | C7H12NzO13      | 1173.76098 | polymeric nonionic detergent                    | synthetic                                 | USAN                    |                                                           | 0.94  | 0.51  | -0.04                  | -0.13 | 0.32    |
| 01506004    | CHLOROKAZEPIDOXIDE             | 100122-13 | E07      | sample         | 337-47-3, 77-27-8 [thiamylal] | C12H17NzNAO2S   | 276.35259  | anesthetic                                      | synthetic                                 | USP-XII, JAN            |                                                           | -0.65 | -0.70 | -0.46                  | -0.67 | -0.29   |
| 01506004    | ASTEMIZOLE                     | 100122-13 | E08      | sample         | 438-41-5, 86-28-3             | C18H14CzNzO3    | 289.32481  | minor tranquilizer, sedative                    | synthetic                                 | USP, INN, BAN, JAN      |                                                           | -0.32 | -0.32 | 0.67                   | 0.29  | 0.17    |
| 01506004    | ASTEMIZOLE                     | 100122-13 | E09      | sample         | 68844-77-9                    | C28H31FNAO4     | 458.58387  | 1H-antistamine (nonsedating)                    | synthetic                                 | USAN, INN, BAN, JAN     |                                                           | -0.56 | -0.55 | 0.84                   | 0.16  | -0.03   |
| 01506014    | ACECANIDIC HYDROCHLORIDE       | 100122-13 | E10      | sample         | 34119-62-8, 32795-44-1        | C19H24CzNzO3    | 313.83043  | antithyrmic                                     | synthetic                                 | USAN, INN               |                                                           | -0.21 | 0.20  | 0.70                   | 0.52  | 0.30    |
| 01506430    | FLURIDITHYL                    | 100122-13 | E11      | sample         | 333-36-8                      | C14H46O         | 182.06626  | central stimulant, convulsant                   | synthetic; SK&F-6539                      | USP, XXI, INN, BAN      | Anesth Analg 95:1611 (2002); 96:1010 (2003)               | -0.42 | -0.50 | -0.70                  | -0.80 | -0.58   |
| 01506430    | 0.11% JAK2zhnb                 | 100122-13 | E12      | 0.11% dmso     |                               |                 |            |                                                 |                                           |                         |                                                           | -0.21 | -0.27 | -0.52                  | -0.80 | -0.58   |
| 01506430    | 0.11% JAK2zhnb                 | 100122-13 | F01      | 0.11% jak2zhnb |                               |                 |            |                                                 |                                           |                         |                                                           | -1.61 | -2.85 | -3.79                  | -2.53 | -2.69   |
| 01506430    | 0.11% JAK2zhnb                 | 100122-13 | F02      | 0.11% jak2zhnb |                               |                 |            |                                                 |                                           |                         |                                                           | 0.18  | 0.00  | -0.87                  | 0.07  | -0.16   |
| 01506430    | 0.11% JAK2zhnb                 | 100122-13 | F03      | 0.11% jak2zhnb |                               |                 |            |                                                 |                                           |                         |                                                           | 0.86  | 0.84  | -0.91                  | 0.40  | 0.81    |
| 01506430    | 0.11% JAK2zhnb                 | 100122-13 | F04      | 0.11% jak2zhnb |                               |                 |            |                                                 |                                           |                         |                                                           | 0.29  | 0.79  | -0.05                  | 0.54  | 0.36    |
| 01506430    | 0.11% JAK2zhnb                 | 100122-13 | F05      | 0.11% jak2zhnb |                               |                 |            |                                                 |                                           |                         |                                                           | 0.14  | 0.61  |                        |       |         |

| Compound ID    | MoNAme                                     | plate     | position | Content        | cas#                           | Formula          | MoWT      | Bioactivity                                                          | Source                                                    | Status                | Reference                                                                                 | rep1  | rep2  | rep3  | rep4  | Average |
|----------------|--------------------------------------------|-----------|----------|----------------|--------------------------------|------------------|-----------|----------------------------------------------------------------------|-----------------------------------------------------------|-----------------------|-------------------------------------------------------------------------------------------|-------|-------|-------|-------|---------|
| 01503222       | FIPEXIDE HYDROCHLORIDE                     | 100122-14 | C06      | sample         | 34161-24-5                     | C20H22Cl2N2O4    | 425.31534 | psychostimulant                                                      | synthetic                                                 | INN                   | hepatotoxic at clinical dose (600mg)                                                      | 1.89  | -0.44 | -0.98 | -0.44 | 0.01    |
| 01500898       | EMODIN                                     | 100122-14 | C07      | sample         | 518-82-1                       | C19H10O5         | 270.24395 | antibacterial, antineoplastic, cathartic, tyrosine kinase inhibitor  | Cascara, Rheum and Rhamnus species                        | experimental          | Oncogene 17: 913 (1998); Planta Med 65: 9 (1999); Clin Clin Ooster Gynaecol 11:573 (1984) | -0.63 | -0.10 | -0.20 | -0.26 | 0.27    |
| 01500449       | ETHACRIDINE LACTATE                        | 100122-14 | C08      | sample         | 1837-57-6; 6402-23-9 (hydrate) | C18H21N3O4       | 343.38577 | antipruritic, abortifacient                                          | INN                                                       | INN, BAN, JAN         | 1.99                                                                                      | -0.33 | -0.82 | 0.00  | -0.58 |         |
| 01500409       | meta-CRESYL ACETATE                        | 100122-14 | C09      | sample         | 122-46-3                       | C9H10O2          | 150.17685 | antiseptic (topical)                                                 | INN                                                       | INN                   | 0.38                                                                                      | 0.33  | 0.33  | 0.38  | 0.38  |         |
| 01500530       | PURPURIN                                   | 100122-14 | C10      | sample         | 81-54-9                        | C14H8O5          | 256.12686 | xanthine oxidase inhibitor, irritant                                 | Rubia and Galium spp                                      | experimental          | J Chem Soc 1928:229; 1929:1399; 1931:3206; Anticancer                                     | 1.13  | 1.65  | 1.08  | 3.05  | 1.41    |
| 01502012       | FOSFOSAL                                   | 100122-14 | C11      | sample         | 6064-83-1                      | C7H7O6P          | 128.10404 | analgesic, antiinflammatory                                          | synthetic                                                 | INN                   |                                                                                           | -0.24 | 0.20  | 3.78  | 0.00  | 1.81    |
| 0.11% JAK2zhnb |                                            | 100122-14 | C12      | sample         | 131-11-1                       | C12H16N2         |           |                                                                      |                                                           |                       |                                                                                           | -1.34 | -1.15 | -0.33 | -0.34 |         |
| 0.11% DMSO     |                                            | 100122-14 | D01      | sample         |                                |                  |           |                                                                      |                                                           |                       |                                                                                           | -2.09 | -0.60 | -2.10 | -0.74 | -1.38   |
| 01503080       | AMBROXOL HYDROCHLORIDE                     | 100122-14 | D02      | sample         | 23828-02-4; 18683-91-5         | C13H19BrClN2O    | 414.57018 | expectorant                                                          | synthetic                                                 | INN, BAN, JAN         |                                                                                           | -1.35 | -1.32 | -1.11 | 0.76  | -0.75   |
| 01502676       | CAPSANTHIN                                 | 100122-14 | D03      | sample         | 465-42-9                       | C40H66O3         | 584.85052 | antineoplastic                                                       | Capiscum annum                                            | experimental          |                                                                                           | -0.35 | 0.79  | 1.80  | 1.46  | 0.93    |
| 01505165       | 3-HYDROXY-1-XYRAMINE                       | 100122-14 | D04      | sample         | 62-31-7                        | C8H11NO2         | 153.19237 | dopaminergic                                                         | synthetic                                                 | experimental          | Am J Physiol 267:R628 (1994); FEBS Lett 325:215 (1993)                                    | -1.01 | -0.94 | -0.33 | -0.87 | -1.19   |
| 00201664       | CELASTROL                                  | 100122-14 | D05      | sample         | 34157-83-0                     | C28H38O4         | 450.62381 | antineoplastic, antiinflammatory, NO synthesis inhibitor, chaperone  | Celastrus scandens & Tripterygium wilfordii               | experimental          | Am J Chem Soc 1963: 2884; 1972: 330; J Org Chem 30: 1729                                  | 0.03  | 1.85  | 0.98  | 0.26  | 0.78    |
| 01501703       | DIALLYL SULFIDE                            | 100122-14 | D06      | sample         | 592-88-1                       | C6H10S           | 114.2106  | antibacterial, antifungal, antineoplastic, antihypercholesterolemic, | Allium spp, Wasabia japonica                              | experimental          | Arch Biochem Biophys 107:337 (1964); JACS 104:312                                         | -0.04 | -0.21 | -1.50 | -0.01 | -0.44   |
| 01500528       | PEUCENIN                                   | 100122-14 | D07      | sample         | 260-18-3                       | C18H26O2         | 260.39237 | antibacterial                                                        | Penicillium notatum                                       | undetermined activity | Ber 74:185 (1941); J Chem Soc (C) 1967:145                                                | 0.19  | -0.01 | -0.31 | -0.32 | 0.01    |
| 01071078       | 5alpha-ANDROSTANE-3,17-DIONE               | 100122-14 | D08      | sample         |                                | C19H28O2         | 288.43381 | androgen                                                             | Human urine & adrenal cortex                              | experimental          |                                                                                           | 1.22  | 0.84  | 0.09  | 0.29  | 1.13    |
| 01221151       | CHLOROQUINALDOL                            | 100122-14 | D09      | sample         | 72-80-0                        | C10H7Cl2N2O      | 228.07939 | antifoliant, antifungal                                              | synthetic                                                 | INN, BAN              |                                                                                           | 1.56  | 1.17  | 0.43  | -0.49 | 0.67    |
| 01221111       | ORFIBLOXACIN                               | 100122-14 | D10      | sample         | 113617-63-3                    | C19H26F3N3O3     | 398.34753 | antibacterial                                                        | synthetic                                                 | INN                   |                                                                                           | 0.89  | 0.98  | -0.16 | -0.89 | 0.21    |
| 01501199       | ZAPRINAST                                  | 100122-14 | D11      | sample         | 37762-05-4                     | C13H13N5O2       | 271.26086 | cAMP phosphodiesterase inhibitor                                     | synthetic; M&B-22948                                      | INN, BAN              |                                                                                           | 0.38  | 0.57  | 0.28  | 0.18  | 0.35    |
| 0.11% JAK2zhnb |                                            | 100122-14 | D12      | 0.11% jak2zhnb |                                |                  |           |                                                                      |                                                           |                       |                                                                                           | -2.14 | -0.83 | -1.51 | -3.94 | -2.10   |
| 0.11% JAK2zhnb |                                            | 100122-14 | E01      | 0.11% jak2zhnb |                                |                  |           |                                                                      |                                                           |                       |                                                                                           | -3.69 | -2.92 | -4.31 | -2.30 | -3.30   |
| 01010258       | OLEANOIC ACID ACETATE                      | 100122-14 | E02      | sample         | 4339-72-4                      |                  |           |                                                                      |                                                           |                       |                                                                                           | -2.60 | -3.25 | 1.67  | -2.43 | -1.68   |
| 00210658       | DEHYDROVARIABILIN                          | 100122-14 | E03      | sample         |                                | C17H14O4         | 282.28873 |                                                                      | birch bark                                                | undetermined activity | J Chem Soc 1939: 1047                                                                     | 0.22  | 0.28  | -0.05 | 0.75  | 0.30    |
| 00211475       | 4-METHOXYCALCONE                           | 100122-14 | E04      | sample         | 22966-19-4                     | C18H14O2         | 238.28878 |                                                                      | Dalbergia variabilis                                      | undetermined activity | Phytochemistry 17: 1417 (1978)                                                            | -0.95 | 0.32  | -0.86 | 0.64  | -0.21   |
| 00200441       | 2-ETHOXYCARBONYL-2-                        | 100122-14 | E05      | sample         |                                | C24H24O9         | 455.45340 |                                                                      | Citrus limon                                              | undetermined activity | Acta Cryst C 48:741 (1992)                                                                | -0.46 | 0.81  | 0.70  | 1.40  | 0.61    |
| 01506073       | IDAZOXAN HYDROCHLORIDE                     | 100122-14 | E06      | sample         | 79944-58-4                     | C11H13ClN2O2     | 240.69146 | alpha2-adrenergic blocker                                            | synthetic                                                 | INN, BAN              | Ann NY Acad Sci 881:272 (1999); CNS Drug Reviews                                          | -0.02 | -0.46 | 0.36  | 0.09  |         |
| 01505827       | BECLAMIDE                                  | 100122-14 | E07      | sample         | 501-88-8                       | C10H12Cl2NO      | 197.66624 | anticonvulsant, antiepileptic                                        | synthetic; mp 94 deg C                                    | INN, BAN              | J Org Chem 16:1283 (1951)                                                                 | -0.34 | 0.98  | -0.14 | -0.60 | -0.02   |
| 00210343       | 1,3,5-TRIMETHOXYBENZENE                    | 100122-14 | E08      | sample         | 621-23-8                       | C8H9O3           | 168.19419 | spasmolytic                                                          | experimental                                              | undetermined activity |                                                                                           | -0.22 | 0.38  | 0.73  | 0.20  | 0.27    |
| 00270043       | 3beta-HYDROXY-23,23-BISNORCHOL-5-ENIC ACID | 100122-14 | E09      | sample         |                                | C22H34O3         | 324.51445 |                                                                      | synthetic                                                 | undetermined activity |                                                                                           | 1.17  | 2.04  | 0.04  | 0.31  | 0.91    |
| 00204070       | PHYSCION                                   | 100122-14 | E10      | sample         | 521-61-9                       | C18H12O5         | 284.27104 | antibacterial, cathartic                                             | Xanthoria lichens, Rumex spp and various Aspergillus spp. | experimental          | Helv Chim Acta 8: 140 (1925); Pharmacology 14: 1 (1976)                                   | -0.22 | 1.19  | 1.16  | -0.16 | 0.58    |
| 01503639       | RIBOSTAMYCIN SULFATE                       | 100122-14 | E11      | sample         | 25646-65-0                     | C17H18N4O14S     | 552.55887 | antibacterial                                                        | Streptomyces ribosidifolius                               | INN, BAN, JAN         |                                                                                           | 1.71  | 0.16  | -0.88 | -0.13 | 0.21    |
| 01503734       | 0.11% DMSO                                 | 100122-14 | E12      | 0.11% dmsso    |                                |                  |           |                                                                      |                                                           |                       |                                                                                           | 1.69  | 1.10  | 1.10  | 1.10  | 0.16    |
| 0.11% JAK2zhnb |                                            | 100122-14 | F01      | 0.11% jak2zhnb |                                |                  |           |                                                                      |                                                           |                       |                                                                                           | -4.15 | -3.28 | -3.35 | -3.41 | -3.55   |
| 00230345       | NIPECOTIC ACID                             | 100122-14 | F02      | sample         | 498-95-3                       | C6H11NO2         | 129.16007 | GABA uptake inhibitor                                                | synthetic                                                 | experimental          | J Neurochem 25: 797 (1975); Life Sci 19: 701 (1976)                                       | -1.55 | -1.53 | -0.31 | 0.49  | -0.73   |
| 00230348       | 1,4-METHOXYPHENYLPIPERAZINE HYDROCHLORIDE  | 100122-14 | F03      | sample         |                                | C11H17ClN2O2     | 228.22394 | 5HT1 receptor agonist                                                | synthetic                                                 | experimental          | Biochem Pharmacol 29: 833 (1980); J Med Chem Soc 3: 1                                     | 0.21  | 0.00  | -1.68 | -1.15 | -0.66   |
| 01505870       | 4-HYDROXYNAPHTHYRINE                       | 100122-14 | F04      | sample         | 1672-63-5                      | C11H9NO2         | 204.23040 | analgesic                                                            | synthetic                                                 | experimental          |                                                                                           | 1.38  | 1.04  | 0.04  | -0.03 | 0.70    |
| 01400010       | IPRIFLAVONE                                | 100122-14 | F05      | sample         | 3512-122-7                     | C18H16O3         | 280.23642 | anabolic                                                             | synthetic                                                 | INN, JAN              |                                                                                           | 0.45  | 0.97  | 1.64  | 0.29  | 0.61    |
| 01502085       | CYCLOCREATINE                              | 100122-14 | F06      | sample         | 35404-03-3                     | C5H9N3O2         | 143.14638 | regulator of creatine biosynthesis                                   | heart & muscle tissue                                     | experimental          |                                                                                           | -0.16 | 0.58  | 1.04  | 0.70  | 0.62    |
| 01502096       | alpha-CYANO-4-HYDROXYCINNAMIC ACID         | 100122-14 | F07      | sample         |                                | C10H7NO3         | 189.12712 | inhibitor of mitochondrial pyruvate transport                        | synthetic                                                 | experimental          |                                                                                           | 0.78  | 0.94  | 0.57  | 0.27  | 0.78    |
| 01506052       | TROLOX                                     | 100122-14 | F08      | sample         | 53188-07-1                     | C14H18O4         | 250.29716 | antioxidant                                                          | synthetic                                                 | experimental          | Food Chem Toxicol 42:45 (2004); Biong Med Chem Letts                                      | 1.05  | 0.33  | 0.70  | 0.07  | 0.53    |
| 00330009       | SODIUM FLUOROACETATE                       | 100122-14 | F09      | sample         | 62-74-8                        | C2H2FNaO2        | 100.02524 | inhibits citric acid cycle                                           | synthetic                                                 | experimental          |                                                                                           | 0.35  | 1.43  | 2.07  | 0.59  | 1.11    |
| 01505899       | HYDROQUINONE HYDROBROMIDE HYDRATE          | 100122-14 | F10      | sample         | 207386-86-5                    | C6H4Br2          | 225.26973 | antipigment                                                          | synthetic; derivative of quinine                          | experimental          |                                                                                           | 0.61  | 2.00  | 3.34  | 0.26  | 1.05    |
| 01505761       | OXYTHAMINE CHLORIDE HYDROCHLORIDE          | 100122-14 | F11      | sample         | 614-05-1                       | C12H17Cl2N3O2S   | 338.25810 | thiamine antagonist                                                  | synthesis                                                 | experimental          | Science 110:162 (1949); Proc Soc Exp Med 72:165 (1949)                                    | 0.95  | 1.37  | 0.88  | 0.06  | 0.81    |
| 0.04% DMSO     |                                            | 100122-14 | F12      | 0.04% dmsso    |                                |                  |           |                                                                      |                                                           |                       |                                                                                           | 1.43  | 5.50  | -0.06 | -0.64 | 1.56    |
| 0.04% JAK2zhnb |                                            | 100122-14 | G01      | 0.04% jak2zhnb |                                |                  |           |                                                                      |                                                           |                       |                                                                                           | -1.67 | -1.99 | -0.30 | -1.21 | -1.29   |
| 00307123       | ESTRONE BENZOATE                           | 100122-14 | G02      | sample         |                                | C28H26O3         | 374.48417 |                                                                      | semi-synthetic                                            | undetermined activity |                                                                                           | -1.05 | -1.05 | -0.40 | -0.58 | -0.58   |
| 01501126       | 5-AMINOPENTANOIC ACID HYDROCHLORIDE        | 100122-14 | G03      | sample         |                                | C5H9ClNO2        | 153.60869 | GABA <sub>A</sub> antagonist                                         | synthetic                                                 | experimental          | Biochem Pharmacol 30: 1105 (1981)                                                         | 0.83  | 2.15  | 0.96  | 0.90  | 1.21    |
| 01500699       | ACETYLTRYPTOPHANAMIDE                      | 100122-14 | G04      | sample         |                                | C13H15N3O2       | 245.2834  | antidepressant, nutrient                                             | synthetic                                                 | experimental          |                                                                                           | -0.79 | -0.64 | 0.79  | 0.30  | -0.09   |
| 01500702       | ACETYLTRYPTOPHAN                           | 100122-14 | G05      | sample         | 1218-34-4                      | C13H15N3O2       | 245.2834  | antidepressant, nutrient                                             | synthetic                                                 | experimental          |                                                                                           | 0.01  | -0.41 | 0.59  | 0.41  | 0.26    |
| 01500762       | ROSOLIC ACID                               | 100122-14 | G06      | sample         |                                | C19H19O4         | 290.32163 | diagnostic aid                                                       | synthetic                                                 | experimental          |                                                                                           | 0.26  | -0.01 | 0.41  | 0.98  | 0.41    |
| 01505862       | 2-AMINO BENZENESULFONAMIDE                 | 100122-14 | G07      | sample         |                                | C6H8N2O2S        | 172.0886  | diagnostic aid                                                       | synthetic                                                 | experimental          |                                                                                           | -0.28 | -0.36 | -0.09 | -0.17 | -0.09   |
| 01504617       | ISAXONINE                                  | 100122-14 | G08      | sample         | 4214-72-6                      | C17H11N3         | 137.18582 | nerve growth stimulant                                               | synthetic                                                 | INN                   | hepatotoxic at clinical dose (1500mg)                                                     | 0.29  | 1.22  | 1.05  | 2.59  | 1.14    |
| 00210515       | PYROGALLIN                                 | 100122-14 | G09      | sample         |                                | C11H8O4          | 204.13401 | antifoliant                                                          | synthetic                                                 | experimental          | aq KClO <sub>4</sub> + catechol + pyrogallol                                              | -0.23 | -0.45 | 0.33  | -0.22 | -0.23   |
| 00201505       | METHYL-1-DESHYDROXYPYROGALLIN-4-           | 100122-14 | G10      | sample         | 77-41-8                        | C11H10O6         | 262.22105 |                                                                      | synthetic                                                 | undetermined activity |                                                                                           | -0.10 | -0.57 | 0.54  | 0.63  | 0.69    |
| 01503207       | CYCLOBENZAPRINE HYDROCHLORIDE              | 100122-14 | G11      | sample         | 6202-25-9; 303-53-7            | C20H22ClN        | 311.85804 | muscle relaxant (skeletal)                                           | synthetic                                                 | USP, INN              |                                                                                           | -2.85 | -0.87 | -0.03 | -1.00 | -0.67   |
| 0.04% DMSO     |                                            | 100122-14 | G12      | 0.04% dmsso    |                                |                  |           |                                                                      |                                                           |                       |                                                                                           | 0.94  | 0.94  | 0.21  | 0.66  | 0.78    |
| 0.04% JAK2zhnb |                                            | 100122-14 | H01      | 0.04% jak2zhnb |                                |                  |           |                                                                      |                                                           |                       |                                                                                           | -2.55 | -2.34 | -2.77 | 1.77  | -1.47   |
| 00300563       | TRICHLORMETHINE                            | 100122-14 | H02      | sample         | 555-77-1                       | C6H13Cl3N        | 240.98921 | antineoplastic, cytotoxic                                            | synthetic                                                 | INN, BAN              |                                                                                           | -0.12 | -1.08 | -1.13 | 1.75  | -0.15   |
| 01500736       | 3,6-DIMETHOXYFLAVONE                       | 100122-14 | H03      | sample         |                                | C17H14O4         | 282.28873 |                                                                      | semi-synthetic                                            | undetermined activity |                                                                                           | -0.56 | -1.28 | -0.22 | 0.22  | -0.46   |
| 01500734       | 3,4'-DIMETHOXYFLAVONE                      | 100122-14 | H04      | sample         |                                | C17H14O4         | 282.28873 |                                                                      | synthetic                                                 | undetermined activity |                                                                                           | -0.41 | -0.05 | 0.02  | 0.11  | -0.05   |
| 01500570       | FURALTADONE                                | 100122-14 | H05      | sample         | 139-91-3                       | C13H16N4O6       | 324.29567 | antibacterial                                                        | synthetic; NF-260                                         | INN, BAN              |                                                                                           | -1.41 | -1.54 | 1.21  | -0.89 | -0.66   |
| 01300010       | ARGININE HYDROCHLORIDE                     | 100122-14 | H06      | sample         | 1119-34-2                      | C6H13ClN4O2      | 210.65055 | ammonia detoxicant, diagnostic aid                                   | widespread in nature                                      | USP                   |                                                                                           | 0.73  | 1.87  | 0.40  | 1.03  | 1.01    |
| 01505241       | SPARTHEINE HYDROCHLORIDE                   | 100122-14 | H07      | sample         |                                | C18H27NO2        | 276.40120 | antitumor                                                            | synthetic                                                 | experimental          | J Chem Soc 1949: 663                                                                      | -0.74 | -0.68 | 0.01  | 1.14  | 0.10    |
| 00100114       | 3alpha-HYDROXY-3-DEOXYANGOLENIC ACID       | 100122-14 | H08      | sample         |                                | C27H36O3         | 427.58377 |                                                                      | undetermined activity                                     |                       |                                                                                           | -0.27 | -0.17 | 1.02  | -0.24 | 0.09    |
| 01300019       | OXGLUTAMATE DISODIUM SALT                  | 100122-14 | H09      | sample         | 103329-34-3; 27025-41-8(oid)   | C20H30N6Na2O12S2 | 656.6027  | antioxidant                                                          | JAN                                                       |                       | 0.41                                                                                      | 0.52  | 0.04  | 0.17  | 0.28  |         |
| 00200180       | COMPERIN                                   | 100122-14 | H10      | sample         | 572-93-2                       | C25H40N6O        | 420.46415 | antioxidant                                                          | Madura pomifera                                           | experimental          |                                                                                           | 0.19  | 0.00  | 2.21  | -0.58 | -0.44   |
| 01505895       | GLYCOCOLIC ACID                            | 100122-14 | H11      | sample         | 475-31-0                       | C2H8Cl3NO6       | 465.63571 |                                                                      | mammalian bile                                            | undetermined activity |                                                                                           | 0.46  | 0.61  | 1.19  | 0.16  | 0.62    |
| empty          |                                            | 100122-14 | H12      | sample         |                                |                  |           |                                                                      |                                                           |                       |                                                                                           | NA    | NA    | NA    | NA    | NA      |
| empty          |                                            | 100122-15 | A01      | sample         |                                |                  |           |                                                                      |                                                           |                       |                                                                                           | NA    | NA    | NA    | NA    | NA      |
| 01500623       | BROXYQUINOLINE                             | 100122-15 | A02      | sample         | 521-74-4                       | C9H5Br2NO        | 302.9543  | antifoliant, disinfectant                                            | synthetic                                                 | INN                   |                                                                                           | -1.66 | -2.18 | -0.89 | -1.43 | -1.43   |
| 01503424       | ALFAXALONE                                 | 100122-15 | A03      | sample         | 23930-19-0                     | C21H32O3         | 332.48739 | anesthetic                                                           | semi-synthetic                                            | INN, BAN, JAN         |                                                                                           | -1.26 | -0.86 | -1.42 | -0.11 | -0.91   |
| 01500999       | DROFENINE HYDROCHLORIDE                    | 100122-15 | A04      | sample         | 1679-76-1                      | C20H23ClNO2      | 353.93654 | antispasmodic                                                        | synthetic                                                 | INN                   |                                                                                           | -1.82 | -3.70 | -2.21 | -3.23 | -2.74   |
| 01501030       | ETHAVERINE HYD                             |           |          |                |                                |                  |           |                                                                      |                                                           |                       |                                                                                           |       |       |       |       |         |

| Compound ID | MoNAme                                           | plate     | position | Content        | cas#                         | Formula       | MoWt       | Bioactivity                                             | Source                                                         | Status                                                   | Reference                                                 | rep1  | rep2  | rep3  | rep4  | Average |
|-------------|--------------------------------------------------|-----------|----------|----------------|------------------------------|---------------|------------|---------------------------------------------------------|----------------------------------------------------------------|----------------------------------------------------------|-----------------------------------------------------------|-------|-------|-------|-------|---------|
| 01505355    | LUFENURON                                        | 100122-15 | F02      | sample         | 103055-07-8                  | C17H8O2F8N2O3 | 511.15811  | molt inhibitor, chitin synthesis inhibitor; insecticide | synthetic; CGA-184699                                          | INN, BAN                                                 | Pakistan J Biol Sci 6:1125 (2003)                         | -5.29 | -1.64 | -2.27 | -1.88 | -2.77   |
| 01503231    | NIMESULIDE                                       | 100122-15 | F03      | sample         | 51803-78-2                   | C13H12N2O5S   | 306.31409  | antiinflammatory                                        | synthetic; R-805                                               | INN, BAN                                                 |                                                           | -0.89 | -0.31 | -1.17 | -1.45 | -0.95   |
| 01505755    | IDEBENONE                                        | 100122-15 | F04      | sample         | 58186-27-9                   | C19H30O5      | 338.4795   | cognition enhancer; nootropic                           | synthetic                                                      | INN                                                      |                                                           | -1.01 | -0.04 | -0.16 | 0.28  | 0.32    |
| 01505783    | OXYPHENICOLUUM BROMIDE                           | 100122-15 | F05      | sample         | 52-10-3                      | C21H34BRN4O3  | 428.1403   | anticholinergic; anticonvulsant                         | synthetic; BA-5473, C-5473                                     | INN, BAN                                                 | Chem Pharm Bull 30:2797 (1982); Biochemistry 21:4096      | -0.67 | -0.57 | -0.28 | -0.69 | -0.58   |
| 01503383    | PEMPINDINE TARTRATE                              | 100122-15 | F06      | sample         | 79-55-0                      | C14H27NO6     | 305.37439  | ganglionic blocker; antihypertensive                    | synthetic                                                      | INN, BAN                                                 |                                                           | 0.67  | 0.71  | -0.50 | -0.35 | 0.13    |
| 01506304    | IPRONAZID SULFATE                                | 100122-15 | F07      | sample         | 54-62-2, 305-33-9 (as F08)   | C9H16N3O5S    | 277.301    | monoamine oxidase inhibitor; antidepressant             | synthetic                                                      | INN, BAN                                                 |                                                           | 0.24  | 0.05  | 2.32  | 0.08  | 0.67    |
| 01503874    | DIETHYL 4,4'-O-PHENYLENE-BIS (3-THIOPHANATE)     | 100122-15 | F08      | sample         |                              | C12H14N4O4S2  | 342.30770  | antifungal (systemic plant)                             | synthetic                                                      | INN, BAN                                                 | agricultural use                                          | 0.00  | 0.20  | 0.39  | 0.20  | 0.59    |
| 01504021    | LUPININE                                         | 100122-15 | F09      | sample         | 486-70-4                     | C19H19NO      | 169.26903  | antifeedant, antiinflammatory, oxytoxic                 | Anabasis aphylla, Lupinus spp                                  | experimental                                             | Helv Chim Acta 11:1062 (1928); JACS 56:2434 (1934)        | -0.07 | -0.53 | 0.09  | 0.02  | -0.12   |
| 01504101    | TETRACHLOROISOPHTHALONITRILE                     | 100122-15 | F10      | sample         |                              | C8Cl4N2       | 265.9146   | antifeedant                                             |                                                                | experimental                                             |                                                           | -1.93 | -1.48 | -1.58 | -0.83 | -1.45   |
| 00105068    | SARMENTOSIDE B                                   | 100122-15 | F11      | sample         |                              | C34H48O13     | 664.75386  | antifeedant                                             | Strophanthus sarmentosus; mp 193-195                           | undetermined activity                                    | Helv Chim Acta 31: 1719 (1948); do: 980 (1957); 41: 736   | 0.74  | 1.74  | -0.14 | 0.47  | 0.70    |
| 01505326    | CLOFLOCTOL                                       | 100122-15 | F12      | 0.04% dmso     |                              |               |            |                                                         |                                                                | INN                                                      |                                                           | 0.66  | -0.08 | -1.11 | 0.20  | -0.21   |
| 01505786    | 0.04% JAK2inhb                                   | 100122-15 | G01      | 0.04% jak2inhb |                              |               |            |                                                         |                                                                | INN                                                      |                                                           | -2.28 | -2.60 | -2.89 | -2.51 | -2.57   |
| 01300048    | XYLOSE                                           | 100122-15 | G02      | sample         | 37693-01-9                   | C12H26O5      | 365.34677  | antibacterial                                           | synthetic                                                      | INN                                                      |                                                           | -0.57 | 0.42  | -0.30 | 0.55  | 0.03    |
| 01505786    | TRICLABENDAZOLE                                  | 100122-15 | G03      | sample         | 58-86-4                      | C14H9Cl3N2O5  | 150.13243  | diagnostic aid                                          | new woods, straw, corncobs, cottonseed hulls and pecan shells. | undetermined activity                                    |                                                           | -0.35 | 1.86  | -1.22 | -0.76 | -0.16   |
| 01502034    | METAMPICILLIN SODIUM                             | 100122-15 | G05      | sample         | 6849-97-0                    | C17H18N3NaO4S | 383.40451  | antibacterial                                           | semisynthetic                                                  | INN, BAN                                                 | Ver Parasitol 13:145 (1983); Vet Rec 11:315 (1983)        | -0.56 | 0.75  | -1.13 | 0.46  | 0.25    |
| 01506039    | ETILOPRIDINE SODIUM                              | 100122-15 | G06      | sample         | 97812-24-3, 842226-10 (base) | C17H26Cl2N2O3 | 377.31437  | disinfectant                                            | semisynthetic                                                  | INN                                                      |                                                           | -0.33 | 0.55  | -0.66 | 0.73  | 0.07    |
| 01500654    | CHALLMOUSOLFONE                                  | 100122-15 | G07      | sample         | 475-32-5                     | C48H76N2O2    | 777.21592  | antileptic                                              | synthetic                                                      | INN, BAN                                                 | Eur J Pharmacol 111:191 (1985); Physiol Behav 61:563      | -0.11 | 0.32  | -1.19 | -1.39 | -0.59   |
| 01504512    | DEFERIPRONE                                      | 100122-15 | G08      | sample         | 30652-11-0                   | C7H9NO2       | 139.15528  | iron chelating agent                                    | synthetic                                                      | INN, BAN                                                 |                                                           | 0.13  | 0.43  | 1.19  | 0.73  | 0.88    |
| 01506047    | THIATRICOL                                       | 100122-15 | G09      | sample         | 51-24-1                      | C14H9BrO4     | 621.93863  | thyroid agent                                           | synthetic                                                      | INN                                                      |                                                           | -1.02 | 0.14  | 0.49  | 1.04  | 0.16    |
| 01504504    | CARSLAM                                          | 100122-15 | G10      | sample         |                              |               | 163.13395  | analgesic                                               | C8H5NO3                                                        | INN, BAN                                                 |                                                           | -2.33 | -0.26 | -0.16 | 0.14  | 0.51    |
| 01504501    | beta-NAPHTHOL                                    | 100122-15 | G11      | sample         | 135-19-3                     | C10H8O        | 144.17468  | antihelmintic, antileptic                               | INN, NF-XI                                                     | Austral J Chem 27:2385 (1974); Tetrahedron Letts 31:6977 | 0.63                                                      | 0.72  | 0.30  | -0.36 | 0.32  |         |
| 01504511    | 0.04% DMSO                                       | 100122-15 | G12      | 0.04% dmso     |                              |               |            |                                                         |                                                                | INN                                                      |                                                           | 1.21  | 2.51  | -0.09 | 0.02  | -0.91   |
| 01504511    | 0.04% JAK2inhb                                   | 100122-15 | H01      | 0.04% jak2inhb |                              |               |            |                                                         |                                                                | INN                                                      |                                                           | -2.53 | -2.52 | -3.07 | 1.82  | -1.57   |
| 01300099    | CYSTINE                                          | 100122-15 | H02      | sample         | 158-79-93-3                  | C8H11Cl3O6    | 309.53227  | anesthetic                                              | synthetic                                                      | INN, DCF                                                 |                                                           | -0.75 | -0.05 | -1.51 | 0.27  | -0.52   |
| 01504073    | UVAIL                                            | 100122-15 | H04      | sample         | 240.30154                    | C30H52O2      | 442.7316   | antiepileptic                                           | widespread in plants and animals                               | INN                                                      |                                                           | 1.04  | -0.56 | -1.81 | -0.94 | -0.57   |
| 01505085    | CLOROLINE HYDROCHLORIDE                          | 100122-15 | H05      | sample         | 545-40-6                     | C30H52O2      | 442.7316   | antiepileptic                                           | Arctostaphylos spp, Leucothoe keiskei, Crataegus cuneata,      | experimental                                             | Bul Chem Soc Jpn 39:2313 (1966); J Pharm Sci 55:1378      | 0.31  | 0.42  | -1.81 | 1.51  | -0.07   |
| 01504520    | EPIESTRIOL                                       | 100122-15 | H06      | sample         | 17789-12-2 (base)            | C31H48Cl2NO   | 338.63767  | MAC-A inhibitor, antidepressant, antiparkinsonian       | synthetic                                                      | INN, BAN                                                 | J Neural Transm Suppl. 52:39 (1998)                       | -0.32 | 1.56  | 1.78  | -0.69 | -0.31   |
| 01300018    | GLUTAMINE (L)                                    | 100122-15 | H07      | sample         | 567-81-9                     | C8H12NO2      | 188.2403   | estrogen                                                | semisynthetic                                                  | INN                                                      |                                                           | -0.47 | 0.16  | -0.28 | 0.40  | 0.14    |
| 01506027    | OXALAMINE CITRATE                                | 100122-15 | H09      | sample         | 56-59-9                      | C5H10N2O3     | 146.14705  | dietary supplement                                      | beetroot; widely distributed in plants                         | USP, INN                                                 |                                                           | 0.96  | 1.05  | 0.00  | -0.22 | -0.03   |
| 01503100    | URAPIDIL HYDROCHLORIDE                           | 100122-15 | H09      | sample         | 959-14-8 (base)              | C20H27NO3     | 327.45303  | antihypertensive                                        | synthetic; SKF-3676, AF-438                                    | INN, BAN, JCN                                            |                                                           | -0.18 | -0.37 | -0.18 | -0.67 | -0.31   |
| 01504506    | TOSYLCHOLARIMIDE SODIUM                          | 100122-15 | H10      | sample         | 34661-75-1                   | C20H32ClNO3   | 423.9468   | antihypertensive                                        | synthetic                                                      | INN, BAN, JCN                                            |                                                           | -0.48 | 0.05  | 0.26  | 1.08  | 1.21    |
| 01504508    | CINCHOPHORE                                      | 100122-15 | H10      | sample         | 127-65-1                     | C7H7ClNNaO2S  | 227.64614  | antiseptic, disinfectant, antiproliferative             | synthetic                                                      | INN, BAN                                                 |                                                           | 0.50  | -0.25 | -0.06 | -0.08 | 0.03    |
| 01504508    | CINCHOPHORE empty                                | 100122-15 | H11      | sample         | 132-60-5                     | C16H11NO2     | 249.27157  | analgesic, antipyretic, antiinflammatory                | synthetic                                                      | INN                                                      |                                                           | 1.23  | 1.18  | -0.05 | 2.30  | 0.92    |
| 01504510    | CHINIOFON                                        | 100122-16 | A01      | sample         |                              |               |            |                                                         | NA                                                             | NA                                                       |                                                           | NA    | NA    | NA    | NA    | NA      |
| 01506031    | PIBIBEDIL HYDROCHLORIDE                          | 100122-16 | A02      | sample         | 8002-90-2                    | C9H5NNaO4S    | 373.1027   | antiprolizol, amebicide                                 | synthetic                                                      | INN, DCF, NF-XI                                          |                                                           | -0.82 | -0.82 | -0.24 | 1.85  | -0.01   |
| 01502015    | NIFLUMIC ACID                                    | 100122-16 | A03      | sample         | 3805-01-4                    | C18H19NO2     | 288.34742  | antipain agent                                          | synthetic                                                      | INN                                                      |                                                           | -1.70 | -0.54 | -0.70 | -0.54 | -0.51   |
| 01506077    | METRICANE                                        | 100122-16 | A04      | sample         | 4394-00-7                    | C31H49F3N2O2  | 282.22408  | analgesic, antiinflammatory                             | synthetic; UP-83                                               | INN                                                      |                                                           | -1.27 | -0.86 | -1.77 | -0.22 | -0.15   |
| 01506038    | PROTODIOPHYRINE B                                | 100122-16 | A05      | sample         | 1084-65-7                    | C19H13NO4S2   | 375.3471   | diuretic, antihypertensive                              | synthetic; SD-17102                                            | INN, BAN                                                 |                                                           | -1.78 | -2.11 | -1.85 | -2.23 | -1.99   |
| 01506018    | ACRIFLAVINIUM HYDROCHLORIDE                      | 100122-16 | A07      | sample         | 124-97-0                     | C14H8ClNO     | 241.063015 | antibacterial                                           | INN                                                            |                                                          | 0.12                                                      | -0.80 | -0.13 | 5.76  | 0.24  |         |
| 01505037    | 3-BROMO-4-METHYL-3,4-HEXAMETHYLENE-3,4-DIOXOLANE | 100122-16 | A08      | sample         | 8018-07-3                    | C14H14ClNO3   | 259.74078  | antitubercle, intercalating agent                       | synthetic                                                      | NF, INN                                                  |                                                           | 0.53  | 0.27  | -2.38 | 0.16  | 0.16    |
| 01503394    | TIDOXOLONE                                       | 100122-16 | A09      | sample         | 4991-65-6                    | C7H4O3S       | 168.17213  | antibactericidal                                        | synthetic; D02                                                 | INN, BAN                                                 |                                                           | 0.36  | 2.39  | -0.47 | -0.14 | 0.51    |
| 01505066    | DECOXYCHOLIC ACID                                | 100122-16 | A10      | sample         | 88-44-3                      | C24H40O4      | 384.594    | antibacterial                                           | undetermined activity                                          | J Biol Chem 238: 3846 (1963)                             |                                                           | 0.15  | 1.22  | -0.44 | -0.23 | -0.23   |
| 01504507    | CHLORINDIONE                                     | 100122-16 | A11      | sample         | 1146-90-2                    | C18H9ClO2     | 256.60078  | anticoagulant, Vitamine K antagonist                    | synthetic; G25766                                              | INN, BAN                                                 |                                                           | 0.26  | 0.00  | -1.15 | 2.88  | 0.53    |
| 01503917    | CLENBUTEROL HYDROCHLORIDE                        | 100122-16 | B01      | 0.04% jak2inhb | 100122-16                    | B01           |            |                                                         |                                                                | INN                                                      |                                                           | -1.03 | -0.70 | -0.39 | -2.44 | -2.09   |
| 01506066    | CYPERMETHRIN                                     | 100122-16 | B02      | 0.04% dmso     | 100122-16                    | B02           |            |                                                         |                                                                | INN                                                      |                                                           | -1.02 | -1.39 | -2.76 | -0.76 | -0.76   |
| 01506079    | MOXISYLYLE HYDROCHORIDE                          | 100122-16 | B03      | sample         | 37148-27-9                   | C12H19Cl3N2O  | 313.65703  | bronchodilator; beta2 adrenergic agonist                | synthetic; NAB-365                                             | INN, BAN, JAN                                            |                                                           | -1.81 | -0.05 | -1.44 | -0.86 | -0.84   |
| 01500040    | BARBITAL                                         | 100122-16 | B04      | sample         | 52315-07-8                   | C22H19Cl2NO3  | 416.30783  | insecticide                                             | synthetic                                                      | BAN                                                      |                                                           | -0.45 | -1.27 | -1.35 | -1.41 | -0.90   |
| 01506085    | OXERDINE                                         | 100122-16 | B05      | sample         | 54-32-0                      | C18H21NO4S    | 279.36255  | alpha-adrenergic blocker                                | synthetic                                                      | INN, BAN, JAN                                            | A Auton Nerv Syst 79: 191 (2000); hepatotoxic at clinical | -0.38 | -1.67 | -1.73 | -1.26 | -1.26   |
| 01505082    | NATFOPIDIL HYDROCHLORIDE                         | 100122-16 | B06      | sample         | 57-44-3                      | C8H12N2O3     | 184.19644  | sedative                                                | INN                                                            |                                                          | Therapeutische Monatsh 17:208 (1963)                      | -0.49 | -0.63 | -0.49 | -0.57 | -0.57   |
| 01506056    | ZARDARVENINE                                     | 100122-16 | B08      | sample         | 94-07-5                      | C9H13NO2      | 167.20946  | anti-obesity                                            | citrus aurantium; SYNEPHRINE                                   | BAN                                                      |                                                           | -0.01 | 0.70  | 0.03  | 1.30  | 0.50    |
| 01505082    | CYCLANDELATE                                     | 100122-16 | B09      | sample         | 465.4243                     | C28H32Cl2NO3  | 465.4243   | antihypertensive                                        | synthetic; D02                                                 | INN                                                      |                                                           | 0.57  | 0.41  | 0.31  | 0.21  | 0.38    |
| 01505434    | HALOTHANE                                        | 100122-16 | B10      | sample         | 101875-7-4                   | C2H2Cl2       | 288.22129  | PCO2 II & II inhibitor, antiallergic                    | synthetic                                                      | Eur Respir J 5:982 (1992); J Pharmacol Exp Ther 270:250  | 0.54                                                      | 0.26  | -0.26 | -1.24 | -0.22 |         |
| 01506047    | VINCAMINE                                        | 100122-16 | B11      | sample         | 456-59-7                     | C17H24O3      | 276.37903  | vasodilator                                             | synthetic; BS-572                                              | INN, BAN, JAN                                            | Arzneim Forsch 2:165 (1952); 3:503 (1953)                 | 0.07  | -0.33 | 1.80  | -0.67 | 0.22    |
| 01505647    | 0.04% JAK2inhb                                   | 100122-16 | B12      | 0.04% jak2inhb | 100122-16                    | B12           |            |                                                         |                                                                | INN, BAN                                                 |                                                           | 0.86  | 0.71  | 0.34  | -0.21 | 0.43    |
| 01505647    | 0.04% DMSO                                       | 100122-16 | C01      | 0.04% dmso     | 100122-16                    | C01           |            |                                                         |                                                                | INN, BAN                                                 |                                                           | 0.22  | 1.23  | 0.48  | -1.65 | 0.07    |
| 00270029    | PRASTERONE ACETATE                               | 100122-16 | C02      | sample         | 53-40-3 (prasterone)         | C21H30O3      | 330.47145  | adrenocortical hormone, antidepressant                  | synthetic                                                      | INN                                                      |                                                           | -1.66 | -1.22 | -1.55 | -1.46 | -1.72   |
| 00270084    | HYDROXYTOLUENE                                   | 100122-16 | C03      | sample         | 83-40-9                      | C7H8O         | 152.15116  | analgesic, antileptic                                   | synthetic; 3-ABS                                               | INN, BAN                                                 |                                                           | -0.43 | -1.37 | -0.61 | -0.18 | -0.65   |
| 00100424    | XYLOCARPUS A                                     | 100122-16 | C04      | sample         | 58.64191                     | C31H38O11     | 536.64191  | antibacterial                                           | synthetic                                                      | INN                                                      |                                                           | -1.51 | -0.78 | -1.83 | -1.17 | -1.32   |
| 01504517    | DOXIFLURIDINE                                    | 100122-16 | C05      | sample         | 3094-09-8                    | C9H11FN2O5    | 246.19682  | antineoplastic                                          | synthetic                                                      | INN, BAN                                                 |                                                           | -0.22 | 0.01  | -0.53 | 0.44  | -0.18   |
| 01504518    | ERLOXATIL                                        | 100122-16 | C06      | sample         | 119-441-6                    | C19H16F2N2O   | 338.30363  | coronary vasodilator                                    | synthetic                                                      | INN, JAN                                                 | Adv Med Phytochemistry 1986: 179                          | -0.49 | -0.01 | -0.54 | -0.24 | -0.37   |
| 01504502    | BITOSCANATE                                      | 100122-16 | C07      | sample         | 4044-65-9                    | C8H4N2S2      | 192.26248  | antihelmintic                                           | synthetic; 16842                                               | INN, MI                                                  |                                                           | 0.01  | 3.40  | 2.00  | -0.20 | 2.11    |
| 01504515    | DIACETAMATE                                      | 100122-16 | C08      | sample         | 2623-33-8                    | C10H11NO3     | 193.20407  | analgesic, antiinflammatory                             | synthetic                                                      | INN, BAN                                                 |                                                           | 1.38  | 0.04  | 3.02  | 1.36  | 1.61    |
| 00271175    | METACEFAMOL                                      | 100122-16 | C09      | sample         | 621-42-1                     | C8H9NO2       | 151.16643  | analgesic                                               | synthetic; BS-749                                              | INN, BAN                                                 |                                                           | 0.49  | 0.62  | 1.40  | -0.19 | 0.33    |
| 00100447    | DEACETOXY(7)-7-OXOKHIVORINIC ACID                | 100122-16 | C10      | sample         | 5025-80-10                   | C27H36O19     | 620.58109  | antibacterial                                           | undetermined activity                                          | INN, BAN                                                 |                                                           | 1.03  | 0.93  | 1.51  | 5.18  | 2.16    |
| 01503416    | MIZORIBINE                                       | 100122-16 | C11      | sample         | 50924-49-7                   | C9H13N3O6     | 259.22046  | immunosuppressant                                       | synthetic                                                      | INN, JAN                                                 |                                                           | -0.36 | -0.73 | -0.19 | -0.58 | -0.58   |
| 01503416    | 0.11% JAK2inhb                                   | 100122-16 | C12      | 0.11% jak2inhb | 100122-16                    | C12           |            |                                                         |                                                                | INN, JAN                                                 |                                                           | 0.62  | 0.72  | 1.16  | -0.51 | 1.25    |
| 01503416    | 0.11% DMSO                                       | 100122-16 | D01      | 0.11% dmso     | 100122-16                    | D01           |            |                                                         |                                                                | INN                                                      |                                                           | -0.67 | -0.94 | -3.76 | -3.61 | -2.24   |
| 00310050    | QUININE ETHYL CARBONATE                          | 100122-16 | D02      | sample         | 83-75-0                      | C23H28N2O4    | 396.49061  | antimalarial                                            | semisynthetic                                                  | JAN, NF-VIII                                             |                                                           | -1.34 | -1.43 | -1.36 | -0.77 | -0.41   |
| 01503200    | CETRIUMONIUM BROMIDE                             | 100122-16 | D03      | sample         | 57-09-0, 6899-10-1           | C19H42BrN     | 364.45729  | antifeedant                                             | synthetic                                                      | NF, INN, BAN                                             |                                                           | -1.80 | -0.69 | -1.62 | -0.53 | -1.16   |
| 00100583    | EUPHOL ACETATE                                   | 1001      |          |                |                              |               |            |                                                         |                                                                |                                                          |                                                           |       |       |       |       |         |

| Compound ID | MoName                                        | plate     | position | Content         | cas#       | Formula     | MoWt      | Bioactivity                                | Source                                                         | Status                | Reference                                                  | rep1   | rep2   | Screen Score (z-score) | rep4   | Average |
|-------------|-----------------------------------------------|-----------|----------|-----------------|------------|-------------|-----------|--------------------------------------------|----------------------------------------------------------------|-----------------------|------------------------------------------------------------|--------|--------|------------------------|--------|---------|
| 00201716    | NORSTICTIC ACID                               | 100122-16 | H10      | sample          | 571-67     | C18H12O9    | 372.29004 | antibacterial                              | Lobaria pulmonaria, Usnea japonica, Lecanora rosacea, Parmelia | experimental          | Z Naturforsch 59: 384 (2004)                               | 1.02   | 1.07   | 1.36                   | 0.53   | 0.99    |
| 00200413    | 2,6-DIMETHOXYQUINONE                          | 100122-16 | H11      | sample          | 35069-70-6 | C8H8O4      | 168.15056 | antibacterial, induces dermatitis, mutagen | Picramnia & Alantthus spp                                      | experimental          |                                                            | 3.25   | 0.00   | -0.21                  | -1.97  | 0.27    |
|             | empty                                         | 100122-16 | H12      | sample          |            |             |           |                                            |                                                                |                       |                                                            | NA     | NA     | NA                     | NA     | NA      |
|             | empty                                         | 100122-17 | A01      | sample          |            |             |           |                                            |                                                                |                       |                                                            | NA     | NA     | NA                     | NA     | NA      |
| 00201538    | DECAHYDROGAMBOGIC ACID                        | 100122-17 | A02      | sample          |            | C38H54O8    | 638.84928 |                                            | derivative                                                     | undetermined activity | Tetrahedron 21: 1453 (1965)                                | -5.44  | -1.23  | -3.08                  | -2.90  | -3.16   |
| 00201595    | OSAJIN                                        | 100122-17 | A03      | sample          | 482-53-1   | C29H42O5    | 440.67070 |                                            | Maclura pomifera                                               | undetermined activity | J Am Chem Soc 63: 1253 (1941); 68: 406 (1946)              | 0.04   | 0.93   | -0.87                  | -1.49  | -0.35   |
| 00201605    | BISANHYDROGUTTLANTINONE                       | 100122-17 | A04      | sample          | 749-18-8   | C22H26O7    | 397.56862 | antibacterial                              | Streptomyces spp; also ruttantrione                            | experimental          | Naturwissenschaften 52: 539 (1965); Chem Ber 100: 256      | -0.12  | -0.30  | -0.73                  | -1.53  | -0.79   |
| 00205071    | HAEMATOMIC ACID, ETHYL ESTER                  | 100122-17 | A05      | sample          | 35053-14-5 | C11H12O5    | 224.21529 |                                            | various lichens, e.g. Evernia spp, Parmelia spp                | undetermined activity | J Org Chem 42: 2526 (1977); Helv Chim Acta 72: 1061        | 1.39   | -0.67  | -0.54                  | 0.12   | 0.07    |
| 00201696    | LANOSTEROL ACETATE                            | 100122-17 | A06      | sample          |            | C32H52O2    | 468.77004 |                                            | derivative of lanosterol                                       | undetermined activity | J Chem Soc 1953: 571                                       | -7.93  | -1.99  | -0.78                  | -2.18  | -3.22   |
| 01056746    | 7-AMINOCEPHALOSPORANIC ACID                   | 100122-17 | A07      | sample          | 957-68-6   | C14H12N2O5S | 272.28154 |                                            | derivative of Cephalosporin C                                  | undetermined activity | Biochem J 79:48 (1961); JACS 84:3400 (1962)                | 0.74   | -0.46  | 0.02                   | 0.25   | 0.14    |
| 00201539    | GARICINOLIC ACID                              | 100122-17 | A08      | sample          |            | C38H46O9    | 646.79409 |                                            | Ann Chem 56: 232 (1968)                                        | undetermined activity |                                                            | 0.23   | 0.12   | 6.15                   | -0.13  | 0.33    |
| 00210369    | GALLIC ACID                                   | 100122-17 | A09      | sample          | 149-91-7   | C7H6O5      | 170.12287 | antineoplastic, astringent, antibacterial  | insect galls                                                   | undetermined activity | J Chem Soc 1961:1854; Agric Biol Chem 30:617 (1966);       | 0.66   | -0.44  | 0.66                   | -0.65  | 0.06    |
| 01000006    | BUSSEIN                                       | 100122-17 | A10      | sample          | 41060-14-4 | C43H54O18   | 858.89903 |                                            | Entandrophragma species                                        | undetermined activity | J Pharm Med 1965:302                                       | -0.84  | -0.11  | -0.24                  | -2.29  | -0.87   |
| 01052248    | GLUTATHIONE                                   | 100122-17 | A11      | sample          | 70-18-8    | C10H17N3O6S | 307.32749 | antioxidant                                | plant and animal tissue                                        | JAN                   |                                                            | 1.38   | 1.30   | -0.20                  | -0.30  | -0.17   |
|             | 0.04% JAK2zhnhb                               | 100122-17 | A12      | 0.04% jak2zhnhb |            |             |           |                                            |                                                                |                       |                                                            | -0.05  | -1.69  | -1.14                  | -2.24  | -1.53   |
|             | 0.04% DMSO                                    | 100122-17 | B01      | 0.04% dmso      |            |             |           |                                            |                                                                |                       |                                                            | -1.08  | -0.62  | -1.38                  | -1.26  | -1.08   |
| 00100049    | KUANYANTHONE                                  | 100122-17 | B02      | sample          | 25279-68-9 | C32H42O8    | 570.68614 |                                            | Khaya species                                                  | undetermined activity | Chem Commun 1967:379                                       | -8.18  | -0.51  | -2.26                  | 1.51   | -2.36   |
| 00200463    | BRAZILEIN                                     | 100122-17 | B03      | sample          |            | C18H12O5    | 284.27104 |                                            | Caesalpinia spp                                                | undetermined activity | Phytochemistry 46: 177 (1997)                              | 0.12   | 0.40   | 0.13                   | 0.19   | -0.26   |
| 00100008    | CARAPIN                                       | 100122-17 | B04      | sample          | 3463-88-5  | C27H32O7    | 468.55189 |                                            | Carapa and Cedrela species; mp 180-185                         | undetermined activity | Chem Commun 1965: 302                                      | -0.05  | -4.19  | -4.00                  | -1.81  | -3.74   |
| 01050256    | SHIKIMIC ACID                                 | 100122-17 | B05      | sample          | 138-59-0   | C7H10O5     | 174.15475 |                                            | common constituent in plants                                   | undetermined activity | Helv Chim Acta 20: 705 (1937)                              | 4.95   | -0.13  | 1.50                   | -0.96  | 0.11    |
| 01054412    | PODOPHYLLIN ACETATE                           | 100122-17 | B06      | sample          | 1180-34-3  | C24H34O9    | 456.45349 |                                            | undetermined activity                                          | undetermined activity |                                                            | -7.27  | -0.67  | -9.07                  | -1.36  | -8.25   |
| 00300423    | DIFUCOL HEXAMETHYL ETHER                      | 100122-17 | B07      | sample          | 14262-07-8 | C38H72O6    | 334.37244 |                                            | derivative                                                     | undetermined activity | J Chem Soc 1969: 2403; Phytochemistry 31: 279              | 0.48   | 0.77   | 0.52                   | -0.09  | 0.42    |
| 00100005    | ANTHOTHETONE                                  | 100122-17 | B08      | sample          | 10410-83-0 | C28H32O7    | 480.56304 |                                            | also as 11-ACETOXYCEDRELONE                                    | undetermined activity | J Chem Soc 1963: 2506, 2515                                | -16.35 | -24.62 | -23.30                 | -13.70 | -19.49  |
| 00100009    | CEDRELONE                                     | 100122-17 | B09      | sample          | 1254-85-9  | C28H32O5    | 422.526   |                                            | Cedrela species                                                | undetermined activity | Naturwissenschaften 52: 539 (1965); Nature 207:1101(1965)  | -21.11 | -3.87  | -6.22                  | -3.16  | -10.09  |
| 00100303    | ALLOPREGNANOLONE                              | 100122-17 | B10      | sample          |            | C21H34O2    | 318.50393 |                                            | semisynthetic                                                  | undetermined activity | J Am Chem Soc 1961:516 (1937)                              | 0.88   | 0.08   | 2.88                   | -0.22  | 1.17    |
| 00100012    | DEACETYL GEDUNIN                              | 100122-17 | B11      | sample          |            | C26H32O6    | 440.54134 |                                            | Khaya, Adziraichta and other West African timbers; mp 264-266  | undetermined activity | J Chem Soc 1961: 3705; Phytochemistry 10: 1845 (1971)      | -0.93  | -0.77  | 0.04                   | 1.21   | -0.13   |
|             | 0.04% JAK2zhnhb                               | 100122-17 | B12      | 0.04% jak2zhnhb |            |             |           |                                            |                                                                |                       |                                                            | 0.53   | 1.20   | -0.25                  | -0.87  | 0.15    |
|             | 0.04% DMSO                                    | 100122-17 | C01      | 0.04% dmso      |            |             |           |                                            |                                                                |                       |                                                            | -1.22  | -1.60  | -0.82                  | -2.99  | 0.24    |
| 00100013    | 3-DEACETYLKUHYVORIN                           | 100122-17 | C02      | sample          |            | C30H40O9    | 544.6479  |                                            | Melaleuca spp                                                  | undetermined activity | J Chem Soc 1970: 1710                                      | -1.39  | -0.69  | -2.20                  | -0.04  | -1.08   |
| 00100014    | 7-DEACETYLKUHYVORIN                           | 100122-17 | C03      | sample          |            | C30H40O9    | 544.6479  |                                            | Khaya species and other West African timbers                   | undetermined activity |                                                            | -0.38  | 1.37   | -0.95                  | 0.32   | 0.09    |
| 00100058    | 1,7-DIDEACETOXY-1,7-DIOXO-3-DEACETYLKUHYVORIN | 100122-17 | C04      | sample          |            | C28H32O7    | 456.54074 |                                            | derivative                                                     | undetermined activity |                                                            | -0.03  | 0.74   | -0.53                  | -0.45  | -0.05   |
| 00100346    | PIROTIIN                                      | 100122-17 | C05      | sample          | 21416-53-5 | C19H18O7    | 310.30051 | GABA <sub>A</sub> receptor antagonist      | rotonin component of Picrototoxin                              | experimental          | J Chem Soc 1952: 1042; 1958: 2987                          | -0.09  | 0.94   | 0.41                   | -1.30  | -0.11   |
| 00100222    | 3-DEOXY-3beta-HYDROXYMEXICANOLIDE 16-ENOL     | 100122-17 | C06      | sample          |            | C28H36O7    | 484.59402 |                                            | derivative                                                     | undetermined activity |                                                            | -1.87  | -1.73  | -2.58                  | -1.36  | -1.87   |
| 00100173    | EPIDYODEGININ                                 | 100122-17 | C07      | sample          |            | C28H34O8    | 468.57838 |                                            | Melaleuca spp                                                  | undetermined activity |                                                            | -2.61  | -3.34  | -2.35                  | 3.33   | -1.26   |
| 00100011    | PRENYL ETIN                                   | 100122-17 | C08      | sample          | 15870-91-4 | C14H14O4    | 246.26325 |                                            | Phaeoxylum obliquum                                            | undetermined activity | J Chem Soc (C) 1967:145; Tet Lett 1967:2147                | 1.31   | -0.53  | 0.17                   | 0.27   | 0.12    |
| 00100060    | MEXICANOLIDE                                  | 100122-17 | C09      | sample          | 1915-67-9  | C27H32O7    | 468.55189 |                                            | Melaleuca spp                                                  | undetermined activity | Tetrahedron 24: 1489 (1968)                                | 0.47   | 1.25   | 1.40                   | 0.37   | 0.87    |
| 00100315    | TIOGENIN                                      | 100122-17 | C10      | sample          | 77-60-1    | C27H44O3    | 416.64993 |                                            | Agavaceae, Dioscoreaceae, Solanaceae, Scrophulariaceae,        | undetermined activity | Chem Ind 1954:1320                                         | 2.26   | -0.70  | 0.80                   | -0.55  | 0.45    |
| 00100513    | PTAEROXYLIN                                   | 100122-17 | C11      | sample          | 14729-11-4 | C19H14O4    | 258.27643 |                                            | Phaeoxylum obliquum, Cedrelapais grevei                        | undetermined activity | J Chem Soc (C) 1966:114; 1967:145; Tet Lett 1967:3459      | -0.17  | -0.94  | 1.06                   | 1.94   | -0.06   |
|             | 0.11% JAK2zhnhb                               | 100122-17 | C12      | 0.11% jak2zhnhb |            |             |           |                                            |                                                                |                       |                                                            | -2.28  | -3.35  | -1.16                  | -1.35  | -2.03   |
|             | 0.11% DMSO                                    | 100122-17 | D01      | 0.11% dmso      |            |             |           |                                            |                                                                |                       |                                                            | -1.77  | -1.10  | -1.21                  | -1.38  | -1.37   |
| 00100223    | 1,2alpha-EPOXYDEACETOXYDIHYDROGEDUNIN         | 100122-17 | D02      | sample          |            | C26H32O7    | 456.54074 |                                            | Melaleuca spp                                                  | undetermined activity |                                                            | -6.80  | -1.65  | -0.16                  | -1.73  | -2.59   |
| 00100105    | 3beta-HYDROXYCARAPIN, 3,8-HEMIACTAL           | 100122-17 | D03      | sample          |            | C27H32O8    | 484.55129 |                                            | derivative                                                     | undetermined activity |                                                            | 0.33   | 0.20   | 0.97                   | 0.35   | 0.36    |
| 00100359    | 3,16-DIDEOXYMEXICANOLIDE-3beta-DIOL           | 100122-17 | D04      | sample          |            | C27H36O7    | 472.58377 |                                            | derivative                                                     | undetermined activity | Taylor (unpublished)                                       | 0.04   | 1.95   | -0.91                  | 1.19   | 0.57    |
| 00100267    | TOTAROL ACETATE                               | 100122-17 | D05      | sample          |            | C27H32O2    | 328.46914 |                                            | Podocarpus totara                                              | undetermined activity | J Chem Soc 1951: 2979                                      | 1.01   | 1.05   | 0.79                   | 0.11   | 0.80    |
| 00100117    | HYDROLYSIS PRODUCT OF BUSSEIN                 | 100122-17 | D06      | sample          |            | C32H40O14   | 648.61652 |                                            | undetermined activity                                          | undetermined activity |                                                            | -0.19  | -0.52  | -0.79                  | -0.58  | -0.79   |
| 00100550    | OLEANOIC ACID                                 | 100122-17 | D07      | sample          | 508-02-1   | C30H48O3    | 466.71256 |                                            | leaves of Olea europea and Viscum album L.                     | undetermined activity | J Chem Soc (C) 1939: 1047                                  | 0.69   | 0.25   | 0.07                   | 1.94   | 0.74    |
| 00100520    | LUNARIN                                       | 100122-17 | D08      | sample          | 24185-61-1 | C28H31N3O4  | 437.54352 |                                            | Lunaria spp                                                    | undetermined activity | Bull Soc Chim France 1956:1840; Naturwissenschaften        | -0.61  | 2.06   | 0.42                   | -0.01  | 0.47    |
| 00100561    | FREDELIN                                      | 100122-17 | D09      | sample          | 559-74-6   | C30H50O     | 426.7324  |                                            | Ceratopetalum apetalum D. Don, Cunoniaceae                     | undetermined activity | J Chem Soc 1954: 473                                       | 0.16   | 1.57   | 0.33                   | 0.33   | 0.63    |
| 00100096    | 3-DEOXY-3beta-HYDROXYANGOLENSIC ACID METHYL   | 100122-17 | D10      | sample          |            | C27H36O7    | 472.58377 |                                            | Melaleuca spp                                                  | undetermined activity |                                                            | -3.19  | -0.94  | -0.42                  | 0.02   | 0.46    |
| 00100081    | UTILIN                                        | 100122-17 | D11      | sample          | 31218-22-1 | C41H52O17   | 816.86139 |                                            | Entandrophragma utile                                          | undetermined activity | J Chem Soc 1960:3827; Chem Commun 1970:1388                | -0.04  | -1.52  | -1.40                  | -0.59  | -0.89   |
|             | 0.11% JAK2zhnhb                               | 100122-17 | D12      | 0.11% jak2zhnhb |            |             |           |                                            |                                                                |                       |                                                            | 0.15   | -2.77  | -2.08                  | -2.59  | -1.82   |
|             | 0.11% JAK2zhnhb                               | 100122-17 | E01      | 0.11% jak2zhnhb |            |             |           |                                            |                                                                |                       |                                                            | -3.12  | -1.17  | -1.87                  | -1.87  | -2.04   |
| 00100201    | 3-DEOXY-3beta-ACETOXYDEOXYDIHYDROGEDUNIN      | 100122-17 | E02      | sample          |            | C30H40O7    | 512.6491  |                                            | Melaleuca spp                                                  | undetermined activity |                                                            | 0.54   | -0.24  | -0.12                  | 2.95   | 0.79    |
| 00100455    | MEROGEDUNIN                                   | 100122-17 | E03      | sample          |            | C21H28O4    | 344.45491 |                                            | derivative                                                     | undetermined activity | J Chem Soc 1966: 506                                       | -0.74  | 1.69   | -0.23                  | -0.64  | 0.02    |
| 00100511    | EXTANDROPHYRAGMIN                             | 100122-17 | E04      | sample          | 11013-05-1 | C42H56O17   | 849.65017 |                                            | Entandrophragma spp.                                           | undetermined activity | J Chem. Res. Synop. 1977: 154                              | 1.12   | 1.87   | 0.51                   | 0.67   | 1.02    |
| 00100355    | 1,3-DIDEACETOXY-7-DEACETOXY-7-OXOKUHYVORIN    | 100122-17 | E05      | sample          |            | C26H34O7    | 458.55668 |                                            | Melaleuca spp                                                  | undetermined activity |                                                            | -2.53  | -2.20  | -2.98                  | -1.07  | -2.19   |
| 00100497    | 3beta-ACETOXYDEOXYDIHYDROGEDUNIN              | 100122-17 | E06      | sample          |            | C30H40O8    | 528.48485 |                                            | Melaleuca spp                                                  | undetermined activity |                                                            | -8.19  | -2.99  | -1.93                  | -1.18  | -3.57   |
| 00100305    | 3beta-HYDROXYISOLLOSPIROSTRI(11)-ENE          | 100122-17 | E07      | sample          |            | C27H42O3    | 414.63399 |                                            | semisynthetic                                                  | undetermined activity |                                                            | -0.40  | -0.14  | -0.80                  | 1.57   | 0.05    |
| 01050569    | DIFTERYIN                                     | 100122-17 | E08      | sample          | 53948-19-8 | C17H14O7S   | 314.29753 |                                            | Phytolacca odorata                                             | undetermined activity | Phytochemistry 13:1943 (1974)                              | 1.01   | 0.78   | 0.47                   | 0.78   | 0.47    |
| 00100286    | PODOTOTARIN                                   | 100122-17 | E09      | sample          |            | C40H58O2    | 570.97030 |                                            | Podocarpus spp                                                 | undetermined activity | Tetrahedron 19: 209 (1963); Phytochemistry 6: 883 (1967)   | -3.54  | 0.56   | 0.48                   | 1.46   | -0.25   |
| 00100360    | beta-AMYRIN                                   | 100122-17 | E10      | sample          | 559-70-6   | C30H50O     | 426.7324  |                                            | widespread in plants                                           | undetermined activity | Phytochemistry 9: 1669 (1970)                              | -0.32  | -0.32  | 0.64                   | 1.16   | -0.51   |
| 00100129    | 8-HYDROXYCARAPINIC ACID                       | 100122-17 | E11      | sample          |            | C26H32O8    | 470.5242  |                                            | Melaleuca spp                                                  | undetermined activity |                                                            | -1.01  | 2.23   | 0.59                   | 1.98   | 1.66    |
|             | 0.11% DMSO                                    | 100122-17 | E12      | 0.11% dmso      |            |             |           |                                            |                                                                |                       |                                                            | -3.55  | 0.58   | 0.48                   | 0.39   | 0.28    |
|             | 0.11% JAK2zhnhb                               | 100122-17 | F01      | 0.11% jak2zhnhb |            |             |           |                                            |                                                                |                       |                                                            | -2.67  | -3.09  | -3.10                  | -3.24  | -3.02   |
| 00100024    | DIHYDROGEDUNIN                                | 100122-17 | F02      | sample          |            | C28H36O7    | 484.59402 |                                            | Melaleuca spp.                                                 | undetermined activity |                                                            | -2.11  | -3.36  | -1.89                  | -3.29  | -2.66   |
| 00100287    | TOTAROL                                       | 100122-17 | F03      | sample          | 511-15-9   | C20H30O     | 286.4615  |                                            | Podocarpus spp, Dacrydium cupressinum, Tetradleaia articulata  | undetermined activity | Aust J Chem 48: 883 (1995)                                 | -1.88  | -0.42  | -1.33                  | -1.99  | -1.45   |
| 00100031    | FISSINOLIDE                                   | 100122-17 | F04      | sample          | 1915-69-1  | C28H36O8    | 512.60547 |                                            | Cedrela fissilis, Khaya grandifolia                            | undetermined activity | Tetrahedron 26: 219 (1970); Tet Letters 1970: 2797; J Chem | 0.47   | 0.67   | -0.13                  | 1.86   | 0.72    |
| 00100432    | DEOXYGEDUNIN                                  | 100122-17 | F05      | sample          |            | C28H34O6    | 466.57958 |                                            | Melaleuca spp                                                  | undetermined activity |                                                            | -0.61  | 0.76   | 1.09                   | -0.22  | 0.26    |
| 00100139    | DEOXYKHAYVORIN                                | 100122-17 | F06      | sample          |            | C30H42O9    | 520.68614 |                                            | Melaleuca spp                                                  | undetermined activity |                                                            | -3.20  | -3.20  | 0.59                   | 2.84   | 0.76    |
| 00100298    | SMILAGENIN ACETATE                            | 100122-17 | F07      | sample          |            | C28H46O4    | 458.68757 |                                            | Smilax ornata, Agave & Yucca spp                               | undetermined activity |                                                            | -2.59  | -0.48  | -1.16                  | -0.94  | -2.29   |
| 00100047    | DEACETOXY-7-OXOGEDUNIN                        | 100122-17 | F08      | sample          |            | C28H36O6    | 484.5254  |                                            | Melaleuca spp                                                  | undetermined activity |                                                            | 2.86   |        |                        |        |         |

| Compound ID MoName |                                          | plate     | position | Content       | cas#       | Formula    | MoWt       | Bioactivity                                                     | Source                                                            | mp | Status                | Reference                                                  | rep1  | rep2  | Screen Score (z-score) |       | rep4  | Average |
|--------------------|------------------------------------------|-----------|----------|---------------|------------|------------|------------|-----------------------------------------------------------------|-------------------------------------------------------------------|----|-----------------------|------------------------------------------------------------|-------|-------|------------------------|-------|-------|---------|
| 0105810            | PEONIFLORIN                              | 100122-18 | C06      | sample        | 23180-57-6 | C23H30O11  | 482.48895  | antiinflammatory, antispasmodic, antihypertensive, antidiuretic | Pennisia spp                                                      |    | experimental          | Tetrahedron 25:1825 (1969)                                 | -1.24 | -0.67 | 1.09                   | 0.05  | -0.19 | -0.19   |
| 0101046            | 7-DESAETOXY-6,7-DEHYDROGEDUNIN           | 100122-18 | C07      | sample        |            | C26H30O8   | 422.526    | derivative of gedunin                                           | derivative of gedunin                                             |    | undetermined activity |                                                            | -0.60 | -0.40 | -0.91                  | -0.49 | -0.51 | -0.51   |
| 0105867            | HARMINE                                  | 100122-18 | C08      | sample        | 442-51-3   | C13H12N2O  | 212.25339  | antiparkinsonian, CNS stimulant                                 | Peganium harmala                                                  |    | experimental          | Phytochemistry 7: 503 (1968)                               | 4.31  | 3.06  | 3.47                   | 2.80  | 3.41  | 3.41    |
| 0101012            | CARAPIN-8(9)-ENE                         | 100122-18 | C09      | sample        |            | C27H30O7   | 466.53565  | Carad and Cedrela species                                       | Carad and Cedrela species                                         |    | undetermined activity | J Biol Chem 20:291 (1953)                                  | 5.08  | 1.11  | 5.60                   | 1.38  | 4.54  | 4.54    |
| 0150425            | OROTIC ACID                              | 100122-18 | C10      | sample        | 65-86-1    | C5H4N2O4   | 156.08863  | hepatoprotectant, uricosuric agent                              | widspread in animals                                              |    | INN                   | J Biol Chem 20:291 (1953)                                  | 0.16  | 4.13  | 3.05                   | -0.65 | 1.67  | 1.67    |
| 0030047            | ANISODAMINE HYDROBROMIDE                 | 100122-18 | C11      | sample        | 17659-49-3 | C17H23NO4  | 303.37716  | anticholinergic, antispasmodic                                  | Scopolia tanguticus                                               |    | CHINA                 | Naturwissenschaften 49: 281 (1962)                         | 0.05  | 2.85  | 0.34                   | 0.88  | 1.03  | 1.03    |
| 0105363            | SPAGULMIC ACID                           | 100122-18 | C12      | 0.11% jak2nhb |            |            |            |                                                                 |                                                                   |    | INN                   | PNAS 80:1116 (1983); Eur J Pharmacol 98:193 (1984); J      | -0.49 | -2.96 | -0.95                  | -2.49 | -1.72 | -1.72   |
| 0021708            | 7-DESHYDROXYPYROGALLIN-4-CARBOXYLIC ACID | 100122-18 | D01      | sample        | 4910-46-7  | C11H16N2O8 | 304.25877  | neurotransmitter, mGluR3 receptors                              | brain tissue                                                      |    | INN                   | PNAS 80:1116 (1983); Eur J Pharmacol 98:193 (1984); J      | -0.61 | -0.57 | -0.99                  | -1.35 | -0.32 | -0.32   |
| 0150611            | 6-METHOXYNORMAMALAN                      | 100122-18 | D03      | sample        | 3589-73-9  | C21H28O6   | 248.19396  | synthetic                                                       | synthetic                                                         |    | undetermined activity | Biochem J 162:297 (1977); J Vasc Res 40:531 (2003)         | 1.15  | -1.35 | -0.36                  | -1.48 | -0.51 | -0.51   |
| 0010718            | ANDROSTERONE ACETATE                     | 100122-18 | D05      | sample        | 1164-95-0  | C21H32O3   | 214.26933  | consultant, halucigen                                           | Androsterone                                                      |    | experimental          | Int J Biochem 14:581 (1982); Neurosci Lett 189:121 (1995); | 0.85  | 0.49  | 0.48                   | 1.01  | 0.78  | 0.78    |
| 0027049            | alpha-HYDROXYDEOXYCHOLIC ACID            | 100122-18 | D06      | sample        | 83-49-8    | C24H40O4   | 392.584    | synthetic                                                       | synthetic                                                         |    | experimental          | J Org Chem 1953: 1852                                      | 0.26  | 0.20  | -0.29                  | 1.52  | 0.42  | 0.42    |
| 0100033            | BIOCHANNIN A                             | 100122-18 | D07      | sample        | 461-40-5   | C18H22O5   | 298.37104  | phytoestrogen                                                   | pig bile                                                          |    | undetermined activity | J Chem Soc 1960:1-1                                        | -0.01 | 0.30  | -0.02                  | 1.22  | 0.38  | 0.38    |
| 0027051            | METHYL DEOXYCHOLATE                      | 100122-18 | D08      | sample        | 3245-38-3  | C24H42O4   | 406.61109  | distributed in Leguminosae                                      | distributed in Leguminosae                                        |    | undetermined activity | Helv Chim Acta 25:797 (1942); J Biol Chem 238: 3846        | -2.29 | -2.59 | -1.20                  | -0.49 | -1.62 | -1.62   |
| 0030038            | JUGLONE                                  | 100122-18 | D09      | sample        | 481-39-0   | C10H6O3    | 174.15752  | antipneplastic, antifungal                                      | leaves and nuts of Juglans spp., Carya spp and Pterocarya spp.    |    | experimental          |                                                            | -3.49 | 0.37  | 1.12                   | 1.74  | -0.06 | -0.06   |
| 0150451            | STIGMASTEROL                             | 100122-18 | D10      | sample        |            | C28H46O    | 412.70531  | leaves and calabar beans; widely distributed in plant oils      | leaves and calabar beans; widely distributed in plant oils        |    | undetermined activity |                                                            | -0.78 | -0.36 | 1.08                   | -0.06 | -1.03 | -1.03   |
| 0150604            | LACTOBIONIC ACID                         | 100122-18 | D11      | sample        | 96-82-2    | C12H22O12  | 358.30184  | food additive                                                   | synemethic                                                        |    | undetermined activity |                                                            | -0.29 | -0.06 | 1.08                   | 1.14  | 1.14  | 1.14    |
| 0105363            | SPAGULMIC ACID                           | 100122-18 | D12      | 0.11% jak2nhb |            |            |            |                                                                 |                                                                   |    | undetermined activity |                                                            | -3.57 | -1.47 | 1.54                   | -2.33 | -1.46 | -1.46   |
| 0105363            | SPAGULMIC ACID                           | 100122-18 | E01      | 0.11% jak2nhb |            |            |            |                                                                 |                                                                   |    | undetermined activity |                                                            | -2.71 | -4.03 | -0.41                  | -1.51 | -3.07 | -3.07   |
| 01600025           | 2,5-DIHYDROXY-4-METHOXYTOLUENE           | 100122-18 | E02      | sample        |            |            |            |                                                                 |                                                                   |    | undetermined activity |                                                            | 0.54  | 1.94  | -0.15                  | 0.33  | 0.66  | 0.66    |
| 01600075           | QUERCETIN PENTAMETHYL ETHER              | 100122-18 | E03      | sample        |            |            |            |                                                                 |                                                                   |    | undetermined activity |                                                            | -0.54 | -1.07 | -0.34                  | -0.44 | -0.60 | -0.60   |
| 01600919           | 3-METHOXYCATECHOL                        | 100122-18 | E04      | sample        | 934-00-9   | C7H8O3     | 140.14001  |                                                                 | Maechauer kuhlmanni                                               |    | undetermined activity | Phytochemistry 17: 1383, 1401 (1990)                       | 0.18  | -0.49 | -1.48                  | 0.60  | -0.30 | -0.30   |
| 01505091           | MENAUQUINONE-4                           | 100122-18 | E05      | sample        |            |            |            |                                                                 |                                                                   |    | undetermined activity | Phytochemistry 17: 1383, 1401 (1990)                       | -4.62 | -0.71 | -0.30                  | 0.36  | -1.32 | -1.32   |
| 0150586            | GRAMINE                                  | 100122-18 | E06      | sample        | 87-52-5    | C11H14N2   | 174.24763  |                                                                 | Arundo, Hordeum, Phalaris spp                                     |    | experimental          | J Org Chem 24:1285 (1959); Phytochemistry 33:741 (1993)    | 0.26  | 0.37  | -0.62                  | -0.49 | 0.19  | 0.19    |
| 0150584            | ESEROLINE FUMARATE                       | 100122-18 | E07      | sample        | 469-22-7   | C17H22N2O5 | 334.37529  | u-poolid receptor agonist, analgesic                            | Coyanthine yohimbe                                                |    | experimental          | J Can J Physiol Pharmacol 59:307 (1981); Eur J Pharmacol   | -0.47 | -0.92 | 0.65                   | -1.15 | -0.47 | -0.47   |
| 0010032            | GEDUNIN                                  | 100122-18 | E08      | sample        | 2753-30-2  | C28H34O7   | 482.57895  | antifeedant, heat shock inducer                                 | numerous Meliaceae species                                        |    | experimental          | J Chem Soc 1960:3827; 1962:5995, 1967:1026, 1969:864;      | -2.61 | -1.80 | -2.68                  | -2.65 | -2.56 | -2.56   |
| 0100118            | 3alpha-HYDROXY-4,4-BISNOR-8,11,13-       | 100122-18 | E09      | sample        |            |            |            |                                                                 |                                                                   |    | undetermined activity |                                                            | 0.06  | 0.03  | 0.93                   | 0.03  | 0.13  | 0.13    |
| 0010291            | STROPHANTHIN                             | 100122-18 | E10      | sample        | 66-28-4    | C28H32O6   | 404.50789  | cardiotonic                                                     | Strophanthus kombe                                                |    | experimental          | J Soc Chem Ind 53: 956 (1934)                              | -4.10 | -1.36 | -0.98                  | -2.85 | -2.20 | -2.20   |
| 00100318           | DIOGENIN                                 | 100122-18 | E11      | sample        | 512-04-9   | C27H42O3   | 414.63399  | antiinflammatory, estrogen; LD50(rat) 4872 mg/kg ip, LD50       | Clintonia, Dioscorea and Solanum spp, Tiliolum erectum, Balanites |    | experimental          | Konstitution und Vorkommen der Organischen                 | -1.56 | 1.33  | 0.84                   | 0.11  | 0.18  | 0.18    |
| 0020054            | 0.11% DMSO                               | 100122-18 | E12      | 0.11% dms     |            |            |            |                                                                 |                                                                   |    | undetermined activity |                                                            | 0.32  | 1.15  | 0.77                   | 0.59  | 0.58  | 0.58    |
| 0010375            | alpha-DIHYDROGEDUNOL                     | 100122-18 | F01      | sample        |            |            |            |                                                                 |                                                                   |    | undetermined activity | J Chem Soc 1961: 3705                                      | -2.22 | -3.77 | -3.85                  | -3.13 | -3.31 | -3.31   |
| 0010434            | DIHYDRODEOXYGEDUNIN                      | 100122-18 | F02      | sample        |            |            |            |                                                                 |                                                                   |    | undetermined activity |                                                            | -0.10 | 2.27  | 1.50                   | 2.44  | 2.08  | 2.08    |
| 0027008            | CHOLESTAN-3-ONE                          | 100122-18 | F03      | sample        | 566-88-1   | C27H46O    | 386.65707  | mammalian sterol                                                | mammalian sterol                                                  |    | undetermined activity |                                                            | 1.22  | 0.46  | 0.55                   | 1.55  | 0.32  | 0.32    |
| 0150574            | SPIRUMINE                                | 100122-18 | F05      | sample        | 71-44-3    | C10H26N4   | 220.34552  | immune modulator                                                | animal tissue, fungi                                              |    | experimental          | Differentiation 19:1 (1981); Cancer Res 42:3248 (1982)     | -0.29 | -1.28 | -0.18                  | 0.90  | -0.21 | -0.21   |
| 0010159            | HETEROPHOSFENIN, METHYL ETHER            | 100122-18 | F06      | sample        | 26213-95-6 | C18H18O4   | 274.31946  | Plasmodium oblique, Harrisonia perforate, Niochamaelea          | Plasmodium oblique, Harrisonia perforate, Niochamaelea            |    | undetermined activity | Tetrahedron Letters 1967:2737                              | -0.34 | -0.98 | 0.22                   | -1.76 | -0.54 | -0.54   |
| 0020115            | PECTOLINARIN                             | 100122-18 | F07      | sample        | 28978-02-1 | C22H34O15  | 622.946313 | Andromeda and Linaria spp, Viciaea elastica, Duranta plumieri   | Andromeda and Linaria spp, Viciaea elastica, Duranta plumieri     |    | undetermined activity | Phytochemistry 12:421 (1973); Chem Pharm Bull 26:2036      | -0.33 | -0.12 | 0.83                   | 0.19  | 0.39  | 0.39    |
| 00200139           | ISOTECTICORIGENIN, 7-METHYL ETHER        | 100122-18 | F08      | sample        |            | C18H16O6   | 328.32462  | Daiberia spp                                                    | Daiberia spp                                                      |    | undetermined activity |                                                            | -0.01 | 2.04  | 5.09                   | 1.39  | 2.12  | 2.12    |
| 0020258            | 2',4'-DIHYDROXYCHALCONE 4'-GLUCOSIDE     | 100122-18 | F09      | sample        |            | C21H22O8   | 402.40469  | antihelmintic & antileucorenic                                  | algynone Flemingia chapp, Acaia neovermicia                       |    | experimental          | Phytochemistry 21: 1063 (1982); Planta Medica 58: 389      | -0.06 | 0.91  | 2.62                   | 0.25  | 0.93  | 0.93    |
| 0020004            | 12a-HYDROXY-12a-METHYLMUNDUSERONE-8-     | 100122-18 | F10      | sample        |            | C19H18O9   | 388.31609  | derivative                                                      | derivative                                                        |    | undetermined activity |                                                            | -0.07 | 1.04  | 1.26                   | -0.22 | -0.22 | -0.22   |
| 00200208           | ASARYLALDEHYDE                           | 100122-18 | F11      | sample        | 4460-86-0  | C10H12O4   | 196.20474  | fly attractant                                                  | Daucus carota, Aconus calamus, Asarum europaeum                   |    | experimental          | J Nat Prod 39: 412 (1976)                                  | -0.46 | 1.66  | 1.12                   | -0.02 | 0.57  | 0.57    |
| 00200215           | 0.04% DMSO                               | 100122-18 | F12      | 0.04% dms     |            |            |            |                                                                 |                                                                   |    | undetermined activity |                                                            | 0.44  | -2.00 | 1.17                   | -1.61 | -0.50 | -0.50   |
| 00200215           | 2-METHYL-5,7,8-TRIMETHOXYISOFLAVONE      | 100122-18 | G01      | 0.04% jak2nhb |            |            |            |                                                                 |                                                                   |    | undetermined activity |                                                            | 1.22  | 0.57  | 1.58                   | 0.78  | 0.78  | 0.78    |
| 00200243           | GRISOFLUVALIC ACID                       | 100122-18 | G02      | sample        | 469-54-5   | C18H15O6   | 326.35231  | derivative                                                      | derivative                                                        |    | undetermined activity |                                                            | -0.24 | -2.50 | 1.57                   | -0.45 | -0.78 | -0.78   |
| 00200442           | 2,3,4-TRIHYDROXY-4-METHOXYBENZOPHENONE   | 100122-18 | G04      | sample        |            | C14H12O5   | 260.24874  | derivative                                                      | derivative                                                        |    | undetermined activity |                                                            | 1.10  | 1.37  | -0.14                  | 0.50  | 0.71  | 0.71    |
| 0020042            | KOPARIN                                  | 100122-18 | G05      | sample        | 65048-75-1 | C20H22O4   | 300.21204  | Cestispermum australe                                           | Cestispermum australe                                             |    | undetermined activity | Aust J Chem 30:1827 (1977)                                 | -0.19 | -0.98 | 0.78                   | 0.96  | 0.35  | 0.35    |
| 00200425           | 2,3-DIHYDROXY-4-METHOXY-4'-              | 100122-18 | G06      | sample        |            | C18H16O5   | 288.30302  | derivative                                                      | derivative                                                        |    | undetermined activity |                                                            | -0.07 | -0.97 | -0.68                  | 2.60  | 0.22  | 0.22    |
| 00200040           | OBUSAUQUINONE                            | 100122-18 | G07      | sample        | 21105-15-7 | C18H14O3   | 254.28818  | Daiberia retusa                                                 | Daiberia retusa                                                   |    | undetermined activity | J Chem Soc 1961: 1395 (1978)                               | -0.67 | 0.37  | -0.95                  | 0.40  | -0.21 | -0.21   |
| 00200427           | PSIDIC ACID                              | 100122-18 | G08      | sample        | 35388-59-7 | C11H12O7   | 256.21409  | Psidia pitulapa                                                 | Psidia pitulapa                                                   |    | undetermined activity | J Chem Soc 1954: 3981; Acta Chem Scand 18: 1979            | -0.04 | 0.09  | -0.24                  | 0.21  | 0.14  | 0.14    |
| 00200110           | ANTIARIN                                 | 100122-18 | G09      | sample        | 642-71-7   | C9H12O5    | 184.19359  | Antaria toxicaria                                               | Antaria toxicaria                                                 |    | undetermined activity | Helv Chim Acta 61: 1181 (1978)                             | 1.30  | 1.40  | 0.65                   | 1.18  | -1.21 | -1.21   |
| 00200011           | THEAFLAVIN                               | 100122-18 | G10      | sample        | 4670-05-7  | C28H42O12  | 564.50743  | antioxidant                                                     | pigment in black tea                                              |    | experimental          | Tet Lett 1966:1193, 4024; Tetrahedron 29:125 (1973)        | -0.23 | 1.15  | 2.43                   | -0.02 | 0.96  | 0.96    |
| 00200010           | HAEMATOXYLIN                             | 100122-18 | G11      | sample        | 517-28-2   | C18H14O6   | 302.26636  | Haematoxylin campechianum                                       | Haematoxylin campechianum                                         |    | undetermined activity | Bull Soc Chim Fr 1972: 3292                                | 0.73  | 0.89  | 1.31                   | 0.41  | 0.47  | 0.47    |
| 00200010           | 0.04% DMSO                               | 100122-18 | G12      | 0.04% dms     |            |            |            |                                                                 |                                                                   |    | undetermined activity |                                                            | 0.10  | 1.52  | 0.13                   | 1.49  | 0.13  | 0.13    |
| 00200011           | 0.04% JAK2nhb                            | 100122-18 | H01      | 0.04% jak2nhb |            |            |            |                                                                 |                                                                   |    | undetermined activity |                                                            | -1.51 | -3.15 | -1.61                  | -2.02 | -2.07 | -2.07   |
| 00200011           | MUNDULONE                                | 100122-18 | H02      | sample        | 481-94-7   | C26H26O6   | 434.49352  | Mundula sericea                                                 | Mundula sericea                                                   |    | undetermined activity | Tet Letters 1963, 281                                      | 6.03  | 7.66  | 5.40                   | 8.33  | 6.86  | 6.86    |
| 00200012           | BRAZILIN                                 | 100122-18 | H03      | sample        | 474-07-7   | C18H14O5   | 286.26698  | Haematoxylin campechianum                                       | Haematoxylin campechianum                                         |    | undetermined activity | J Chem Soc 1928: 1504                                      | -1.11 | -1.56 | -1.59                  | 1.79  | -0.38 | -0.38   |
| 00200054           | FUMARROTTETETRAIC ACID                   | 100122-18 | H04      | sample        | 488-50-9   | C22H16O12  | 472.35562  | Cedrela islandica                                               | Cedrela islandica                                                 |    | undetermined activity | Chem Ber 67: 411, 768 (1934)                               | -0.43 | 0.50  | 0.60                   | 0.30  | 0.30  | 0.30    |
| 00200035           | HGALEOIDIN                               | 100122-18 | H05      | sample        | 55365-63-4 | C18H14C2O7 | 413.21408  | Lecanora galeoides                                              | Lecanora galeoides                                                |    | undetermined activity | J Chem Soc 1986: 1491                                      | 0.98  | 0.55  | 0.27                   | 1.25  | 0.76  | 0.76    |
| 00200070           | LECANORIC ACID                           | 100122-18 | H06      | sample        | 480-56-8   | C18H14O7   | 318.28578  | common constituent of lichens                                   | common constituent of lichens                                     |    | undetermined activity | Monatsh Chem 61:147 (1932)                                 | 0.28  | -0.08 | 0.54                   | -0.10 | 0.16  | 0.16    |
| 00100584           | GITONGININ DIACETATE                     | 100122-18 | H07      | sample        | 5996-03-2  | C27H38O7   | 474.58977  | derivative                                                      | derivative                                                        |    | undetermined activity | Helv Chim Acta 33: 76 (1950)                               | -4.28 | -1.13 | -3.36                  | -1.33 | -4.76 | -4.76   |
| 00105959           | 2-METHYL GRAMINE                         | 100122-18 | H08      | sample        | 188-274-2  | C12H16N2   | 198.27472  | derivative                                                      | derivative                                                        |    | undetermined activity |                                                            | 0.17  | -0.60 | -1.42                  | -1.09 | -0.74 | -0.74   |
| 00100609           | XANTHYLETIN                              | 100122-18 | H09      | sample        | 553-19-5   | C14H12O3   | 228.24949  | Brosimum rubescens, Rora, Boemninghausenia, Flandersia,         | Brosimum rubescens, Rora, Boemninghausenia, Flandersia,           |    | undetermined activity | J Chem Soc (C) 1969:33; Phytochemistry 11:3479 (1972)      | -0.24 | 1.37  | 1.20                   | 2.24  | 1.26  | 1.26    |
| 00100616           | 4-HYDROXY-4-METHYL ETHER                 | 100122-18 | H10      | sample        | 630-3521-1 | C28H38O11  | 480.63211  | derivative                                                      | derivative                                                        |    | undetermined activity | Helv Chim Acta 61: 1814 (1978)                             | 0.03  | -0.27 | 0.74                   | -0.37 | 0.48  | 0.48    |
| 00100616           | ANGOLENSIN R                             | 100122-18 | H11      | sample        | 4842-48-2  | C18H16O4   | 272.30352  | Pteropsis and Pterocarya spp                                    | Pteropsis and Pterocarya spp                                      |    | undetermined activity | J Chem Soc 1959: 2679, 1963: 5573                          | -0.28 | 1.78  | 0.62                   | -0.19 | 0.48  | 0.48    |
| 00200428           | empty                                    | 1         |          |               |            |            |            |                                                                 |                                                                   |    |                       |                                                            |       |       |                        |       |       |         |

| Compound ID | MoNAME                          | plate     | position | Content       | cas#       | Formula   | MolWt     | Bioactivity                                           | Source                                                            | Status                | Reference                                                                    | rep1  | rep2  | Screen Score (z-score) | rep4  | Average |
|-------------|---------------------------------|-----------|----------|---------------|------------|-----------|-----------|-------------------------------------------------------|-------------------------------------------------------------------|-----------------------|------------------------------------------------------------------------------|-------|-------|------------------------|-------|---------|
| 00300020    | 1-MONOPALMITIN                  | 100122-19 | F02      | sample        | 542-44-9   | C19H38O4  | 330.51231 |                                                       | Asparagus, Monodica spp; widespread in plants                     | undetermined activity |                                                                              | -1.13 | -0.61 | 1.79                   | 0.05  | 0.03    |
| 00300058    | EPH1(3)TORULOSOL                | 100122-19 | F03      | sample        | 3650-30-4  | C20H34O2  | 306.49278 |                                                       | Cryptomeria japonica and Larix sibirica                           | undetermined activity | J Org Chem 29: 1554 (1964); Phytochemistry 13:471 (1974)                     | -1.05 | -0.62 | 0.03                   | 1.77  | 0.03    |
| 00300055    | CADIN-4-EN-10-OL                | 100122-19 | F04      | sample        |            | C19H28O   | 222.37387 |                                                       | Chamaecyparis ssp and Juniperus spp                               | undetermined activity | Tet Lett 1968: 1913                                                          | -0.17 | 2.27  | 0.69                   | 0.16  | 0.99    |
| 00300056    | LARIXOL                         | 100122-19 | F05      | sample        |            | C20H34O2  | 306.49278 |                                                       | Chamaecyparis ssp and Juniperus spp                               | undetermined activity | Tet Letters 1965: 3523; 1967: 219                                            | -0.12 | 0.67  | -0.05                  | 2.41  | 0.78    |
| 00300057    | LARIXOL ACETATE                 | 100122-19 | F06      | sample        |            | C22H36O3  | 348.53042 |                                                       | Larix europaea                                                    | undetermined activity | Tet Letters 1965: 3523; 1967: 220                                            | -0.22 | 0.82  | -0.77                  | -0.16 | 0.04    |
| 00300146    | VULPINIC ACID                   | 100122-19 | F07      | sample        | 521-52-8   | C19H14O5  | 322.32043 | antiflammatory, antibacterial, plant growth inhibitor | numerous lichens, e.g. Letharia vulpina                           | experimental          | J Am Chem Soc 72:1824 (1950)                                                 | 0.12  | 0.74  | -0.44                  | 0.31  | 0.12    |
| 00300110    | 3-NOR-3-OXOPANASINANS-4-OL      | 100122-19 | F08      | sample        |            | C19H28O   | 222.32043 |                                                       | Chamaecyparis ssp and Juniperus spp                               | undetermined activity | Chem Pharm Bull 35: 1975 (1987)                                              | -1.13 | 1.13  | 0.08                   | 0.13  | 0.08    |
| 00300111    | 2-METHOXY-6-(B)EPOXY-           | 100122-19 | F09      | sample        |            | C16H28O2  | 252.40036 |                                                       | derivative                                                        | undetermined activity |                                                                              | -0.08 | -0.29 | 0.23                   | -1.04 | -0.30   |
| 00300117    | ISOKOBUZONE                     | 100122-19 | F10      | sample        | 24173-72-9 | C14H22O2  | 222.33024 |                                                       | Cyperus rotundus, Sundora sumatrana                               | undetermined activity | Chem Pharm Bull 17:1390 (1969); 42:138 (1994)                                | 0.55  | 0.61  | 3.57                   | 1.27  | 1.50    |
| 00300118    | 3-7-EPOXYCARYOPHYLLAN-6-OL      | 100122-19 | F11      | sample        |            | C19H28O2  | 238.37327 |                                                       | derivative Lippia spp                                             | undetermined activity |                                                                              | -2.74 | 0.20  | 3.88                   | -0.85 | 0.12    |
| 00300132    | 0.04% DMSO                      | 100122-19 | F12      | 0.04% dmso    |            |           |           |                                                       | Pharmazie 15: 650 (1960)                                          | undetermined activity |                                                                              | 0.76  | 0.41  | 0.94                   | 3.43  | 0.72    |
| 00300133    | 0.04% JAK2nhb                   | 100122-19 | G01      | 0.04% jak2nhb |            |           |           |                                                       | derivative Lippia spp                                             | undetermined activity |                                                                              | -2.05 | -2.61 | -2.78                  | -1.47 | -2.23   |
| 00300139    | 2-HYDROXY-4-(B)EPOXY-           | 100122-19 | G02      | sample        |            | C19H28O2  | 238.37327 |                                                       | derivative Lippia spp                                             | undetermined activity |                                                                              | -0.87 | -0.34 | -0.15                  | 0.28  | -0.27   |
| 00300132    | 3-7-EPOXYCARYOPHYLLAN-6-ONE     | 100122-19 | G03      | sample        |            | C19H28O2  | 238.37327 |                                                       | derivative Dipterocarpus pilosus, Salvia canariensis, Vigueria    | undetermined activity | Chem Pharm Bull 42: 138 (1994)                                               | -0.34 | 0.08  | 0.77                   | 0.60  | 0.77    |
| 00300133    | CLOVANEDIOL DIACETATE           | 100122-19 | G04      | sample        |            | C19H30O4  | 322.44855 |                                                       | derivative Dipterocarpus pilosus, Salvia canariensis, Vigueria    | undetermined activity |                                                                              | -1.44 | -1.33 | -0.65                  | -1.24 | -1.16   |
| 00300704    | 3-OXOURSIN (28-13)OLIDE         | 100122-19 | G05      | sample        |            | C30H44O3  | 452.68338 |                                                       | semisynthetic                                                     | undetermined activity |                                                                              | 0.03  | 2.51  | -0.00                  | 1.49  | 0.88    |
| 00300750    | DEHYDROABETATE                  | 100122-19 | G06      | sample        |            | C20H28O2  | 220.46023 |                                                       | derivative                                                        | undetermined activity |                                                                              | -4.53 | -3.47 | -3.72                  | -2.96 | -3.67   |
| 00300756    | MUROLICLADINE-3-ONE             | 100122-19 | G07      | sample        |            | C19H28O   | 218.34199 |                                                       | derivative                                                        | undetermined activity | Col Czech Chem Comm 31: 3373 (1966)                                          | -0.31 | -0.04 | 0.24                   | -0.06 | -0.04   |
| 00300160    | 3-PINANONE OXIDE                | 100122-19 | G08      | sample        |            | C10H17NO  | 167.25309 |                                                       | derivative                                                        | undetermined activity |                                                                              | 2.09  | 0.95  | 0.72                   | 3.41  | 1.46    |
| 00300551    | MELILOTOSIDE                    | 100122-19 | G09      | sample        |            | C18H32O16 | 504.44614 |                                                       | honey & plant exudates                                            | undetermined activity | J Org Chem 11: 810 (1946)                                                    | 0.77  | 1.17  | 0.72                   | 0.83  | 1.20    |
| 00300639    | ARBITUN                         | 100122-19 | G10      | sample        | 497-76-7   | C19H16O7  | 272.25712 |                                                       | Bergenia crassifolia, also in Pyrus and Vaccinium spp.            | undetermined activity |                                                                              | 0.16  | 0.20  | 0.84                   | 3.43  | 1.39    |
| 00300533    | ISOSAFROLE                      | 100122-19 | G11      | sample        | 120-58-1   | C10H10O2  | 162.19    |                                                       | Illicium religiosum                                               | undetermined activity | J Chem Soc 1927:2489; J Biol Chem 255:7941 (1980); J                         | 0.40  | 0.23  | 0.47                   | 3.70  | 1.45    |
| 00300540    | 0.04% DMSO                      | 100122-19 | G12      | 0.04% dmso    |            |           |           |                                                       |                                                                   | undetermined activity |                                                                              | 1.29  | 0.32  | 0.40                   | 0.18  | 0.30    |
| 00300541    | 0.04% JAK2nhb                   | 100122-19 | H01      | 0.04% jak2nhb |            |           |           |                                                       | derivative                                                        | undetermined activity |                                                                              | -2.82 | -2.12 | -0.13                  | 0.16  | -0.97   |
| 00300540    | HYMEGROMONE METHYL ETHER        | 100122-19 | H02      | sample        | 2555-28-4  | C11H11O03 | 190.20055 |                                                       | Dalbergia volubilis, Eugatorium pauciflorum                       | undetermined activity | Indian J Chem 15:94, 492 (1977)                                              | -0.69 | -0.29 | 0.12                   | 0.15  | -0.88   |
| 00300537    | XANTHOPHTERIN                   | 100122-19 | H03      | sample        | 119-44-8   | C6H5N2O2  | 179.13905 | cell proliferation inhibitor                          | human urine, butterfly wing pigment                               | experimental          | J Het Chem 29:583 (1992); Int J Biochem 25:1873 (1993)                       | 2.46  | -0.04 | -0.76                  | 0.52  | 0.55    |
| 00300542    | SANTONIN                        | 100122-19 | H04      | sample        | 461-06-1   | C15H18O3  | 246.30891 |                                                       | Artemisia spp.                                                    | undetermined activity | J Chem Soc 1930: 1110                                                        | -1.26 | -0.67 | -1.26                  | -0.17 | -0.84   |
| 00300547    | PHLOERIDIN                      | 100122-19 | H05      | sample        | 63-51-1    | C21H24O10 | 436.41943 | induces experimental glucosuria, antiflammatory       | experimental                                                      | experimental          | J Chem Soc 1933: 1170; Physiol Rev 25: 255 (1945)                            | -0.35 | -1.13 | -1.13                  | -0.31 | -0.41   |
| 00300558    | GEDUNOL                         | 100122-19 | H06      | sample        |            | C28H36O7  | 484.59492 |                                                       | Melaleuca spp.                                                    | undetermined activity |                                                                              | -0.07 | -1.14 | -0.01                  | -0.26 | -0.21   |
| 00300566    | CHRYSANTHOLIN ALCOHOL           | 100122-19 | H07      | sample        | 5611-92-5  | C18H18O   | 154.25436 |                                                       | reduction product of pyrethrin constituent                        | undetermined activity | J Org Chem 25: 1434 (1960)                                                   | -1.14 | -0.35 | -0.52                  | -1.23 | -0.81   |
| 00300564    | MENTHONOL                       | 100122-19 | H08      | sample        |            | C10H18O   | 154.25436 |                                                       | C10H18O and isopropyl menthyl ether                               | undetermined activity |                                                                              | 0.21  | 0.06  | 1.06                   | 0.73  | 1.05    |
| 00300556    | CHRYSAROBIN                     | 100122-19 | H09      | sample        | 491-56-7   | C19H12O3  | 204.26109 |                                                       | Andira araroba (glacial ACOH)                                     | undetermined activity | J Am Chem Soc 53: 4114 (1931)                                                | 0.67  | 1.41  | 0.98                   | 1.72  | 1.69    |
| 00300553    | PELLETIERINE HYDROCHLORIDE      | 100122-19 | H10      | sample        |            | C8H16ClNO | 177.67582 |                                                       | Punica granatum                                                   | undetermined activity | Bull Soc Chim Fr 1961: 1993                                                  | -0.04 | -0.26 | -0.30                  | -1.77 | -0.35   |
| 00300554    | PHLORETIN                       | 100122-19 | H11      | sample        | 60-82-2    | C15H14O5  | 274.27583 |                                                       | Prunus spp.                                                       | undetermined activity | Ann Rev Biochem 20: 4955 (1951)                                              | -0.93 | -1.08 | -0.52                  | -2.24 | -0.97   |
| 00300554    | empty                           | 100122-19 | H12      | sample        |            | NA        | NA        |                                                       | NA                                                                | undetermined activity |                                                                              | NA    | NA    | NA                     | NA    | NA      |
| 00300554    | empty                           | 100122-20 | A01      | sample        |            | NA        | NA        |                                                       | NA                                                                | undetermined activity |                                                                              | NA    | NA    | NA                     | NA    | NA      |
| 00201020    | CATECHIN TETRAMETHYLETHYR       | 100122-20 | A02      | sample        |            | C19H22O6  | 346.38359 |                                                       | derivative                                                        | undetermined activity |                                                                              | -2.32 | -2.28 | -0.88                  | -1.30 | -1.70   |
| 00200499    | ACACETIN                        | 100122-20 | A03      | sample        | 480-44-4   | C18H21O5  | 298.27104 | antiflammatory, spasmolytic agent, antioxidant        | Robinia pseudacacia                                               | experimental          | J Pharm Soc Japan 73: 481 (1953); Experientia 47: 195                        | -0.98 | -1.12 | -0.98                  | -1.12 | -0.98   |
| 01504256    | EPICATECHIN PENTACETATE         | 100122-20 | A04      | sample        |            | C29H42O11 | 500.46343 |                                                       | derivative                                                        | undetermined activity |                                                                              | -1.20 | -1.79 | -0.18                  | 0.00  | -1.02   |
| 00205113    | EPIGALLOCATECHIN                | 100122-20 | A05      | sample        | 970-74-1   | C19H14O7  | 306.27463 |                                                       | green tea                                                         | undetermined activity |                                                                              | 2.32  | -1.48 | 0.05                   | -1.14 | -0.06   |
| 01500537    | CATECHIN-3-O-METHYL             | 100122-20 | A06      | sample        |            | C20H16O11 | 426.34011 |                                                       | derivative                                                        | undetermined activity |                                                                              | -1.88 | -1.25 | -0.85                  | -0.72 | -1.17   |
| 00201513    | EPIGALLOCATECHIN 3,5-DIGALLATE  | 100122-20 | A07      | sample        |            | C29H42O15 | 610.48699 |                                                       | tea pigment                                                       | undetermined activity |                                                                              | -1.61 | -0.38 | -0.52                  | 0.27  | 0.32    |
| 00210206    | EPICATECHIN                     | 100122-20 | A08      | sample        | 490-46-0   | C19H14O6  | 290.27523 | antioxidant                                           | tea and cocoa constituent                                         | experimental          | J Chem Soc 1969: 1824; Acta Cryst C 40: 2068 (1984)                          | -1.51 | 0.65  | -1.44                  | -1.85 | -1.04   |
| 00210239    | EPIGALLOCATECHIN-3-MONOGALLATE  | 100122-20 | A09      | sample        | 989-51-5   | C22H18O11 | 458.36216 |                                                       | tea pigment                                                       | undetermined activity |                                                                              | 3.06  | -0.26 | 0.86                   | 0.43  | 1.02    |
| 00201507    | 2'-O-BENZOYL-3-O-METHYL         | 100122-20 | A10      | sample        |            | C44H34O22 | 914.74322 |                                                       | tea pigment                                                       | undetermined activity |                                                                              | -0.01 | 0.24  | 0.30                   | 0.00  | 0.28    |
| 00210238    | EPICATECHIN MONOGALLATE         | 100122-20 | A11      | sample        | 1257-08-5  | C22H18O10 | 442.38276 |                                                       | tea pigment                                                       | undetermined activity |                                                                              | 0.18  | 0.82  | 0.86                   | 2.89  | 1.07    |
| 00300141    | 0.04% JAK2nhb                   | 100122-20 | A12      | 0.04% jak2nhb |            |           |           |                                                       |                                                                   | undetermined activity |                                                                              | -1.18 | -0.12 | -0.31                  | -2.59 | -1.05   |
| 00300142    | 0.04% DMSO                      | 100122-20 | B01      | 0.04% dmso    |            |           |           |                                                       |                                                                   | undetermined activity |                                                                              | -4.61 | -3.90 | -4.44                  | -3.90 | -4.44   |
| 00300143    | VISNAGIN                        | 100122-20 | B02      | sample        | 82-67-5    | C13H10O4  | 230.22225 |                                                       | Artemisia annua                                                   | undetermined activity | Tetrahedron 3: 230 (1988)                                                    | -2.22 | -2.74 | 0.95                   | -1.20 | -0.55   |
| 00300128    | GLUCOSAMINIC ACID               | 100122-20 | B03      | sample        |            | C6H13NO6  | 195.17361 |                                                       | oxidation product of glucosamine (01500316)                       | undetermined activity |                                                                              | 3.09  | -1.83 | -0.10                  | -0.11 | -0.24   |
| 00300130    | RHODNYL ACETATE                 | 100122-20 | B04      | sample        |            | C18H20O4  | 198.30794 |                                                       | common constituent of plant essential oils                        | undetermined activity |                                                                              | 1.94  | -0.67 | -0.59                  | 2.72  | 1.35    |
| 00300101    | HELININE                        | 100122-20 | B05      | sample        | 546-43-0   | C18H20O4  | 232.32545 | antithrombotic, antibacterial, antineoplastic         | ginseng                                                           | undetermined activity | J Am Chem Soc 79: 5721 (1957); 88: 3408 (1966); J Org                        | -1.02 | 0.60  | -0.59                  | -0.60 | -0.63   |
| 00300102    | HESPERETIN                      | 100122-20 | B06      | sample        | 520-33-2   | C18H14O6  | 302.26638 |                                                       | glycone of hesperidin (00310011)                                  | undetermined activity | J Chem Soc 1956: 632                                                         | -1.42 | 0.14  | -0.92                  | -0.58 | -0.70   |
| 00300109    | EPICATECHIN                     | 100122-20 | B07      | sample        |            | C19H14O6  | 290.44927 |                                                       | in normal human urine                                             | undetermined activity | J Am Chem Soc 75: 2275 (1953)                                                | -0.52 | 0.27  | 0.09                   | -0.55 | -0.18   |
| 00300108    | DIENOLIC ACID                   | 100122-20 | B08      | sample        | 498-59-9   | C21H32O2  | 254.32863 |                                                       | diolene leaf (Pithecolobium lobatum)                              | undetermined activity | J Biol Chem 166: 373 (1947)                                                  | 0.73  | 0.65  | 1.73                   | 4.80  | 1.42    |
| 00300105    | CEDRYL ACETATE                  | 100122-20 | B09      | sample        | 77-54-3    | C17H28O2  | 264.41511 |                                                       | semisynthetic                                                     | undetermined activity |                                                                              | -0.41 | 0.98  | 1.65                   | -0.40 | 0.46    |
| 00301023    | HYPOXANTHINE                    | 100122-20 | B10      | sample        | 68-94-0    | C5H4N4O   | 136.11383 |                                                       | widely distributed in the plant and animal kingdom                | undetermined activity |                                                                              | 2.03  | 0.59  | 1.31                   | -0.08 | 0.96    |
| 00301021    | PHYTOL                          | 100122-20 | B11      | sample        |            | C19H38O   | 282.51411 |                                                       | netles                                                            | undetermined activity | J Chem Soc 1966: 2144                                                        | -6.25 | -1.35 | -0.65                  | -1.83 | -2.52   |
| 00300143    | 0.04% JAK2nhb                   | 100122-20 | B12      | 0.04% jak2nhb |            |           |           |                                                       |                                                                   | undetermined activity |                                                                              | -1.62 | -0.43 | -0.25                  | -2.91 | -1.30   |
| 00300143    | 0.04% DMSO                      | 100122-20 | C01      | 0.04% dmso    |            |           |           |                                                       |                                                                   | undetermined activity |                                                                              | -0.08 | -0.94 | -1.77                  | -3.50 | -2.57   |
| 00300109    | CHRYSANTHEMIC ACID, ETHYL ESTER | 100122-20 | C02      | sample        |            | C12H20O2  | 196.292   | insecticide                                           | pyrethrum flowers                                                 | experimental          | J Chem Soc 1945: 283                                                         | -1.14 | -2.08 | -0.97                  | 2.19  | -0.50   |
| 00300104    | ANABASINIC ACID HYDROCHLORIDE   | 100122-20 | C03      | sample        |            | C18H20O4  | 198.30794 |                                                       | Agave americana, Nicotiana glauca                                 | undetermined activity | J Am Chem Soc 57: 959 (1935)                                                 | -0.42 | 0.28  | 0.37                   | 0.31  | -0.20   |
| 00300101    | ACONITIC ACID                   | 100122-20 | C04      | sample        | 585-84-2   | C8H6O6    | 174.1112  |                                                       | Aconitum and Aconitina spp                                        | undetermined activity | Ind Eng Chem Soc 63: 837 (1941)                                              | -3.20 | -2.37 | 0.02                   | 3.59  | 1.61    |
| 00300101    | HESPERIDIN                      | 100122-20 | C05      | sample        | 520-26-3   | C28H34O15 | 610.57418 | capillary protectant                                  | Citrus spp.                                                       | experimental          |                                                                              | 0.02  | 2.12  | 0.91                   | 1.33  | 1.09    |
| 00300101    | LARIXINIC ACID                  | 100122-20 | C06      | sample        | 118-71-8   | C19H28O   | 222.32043 |                                                       | Larix decidua                                                     | undetermined activity | Be 27: 3115 (1984); 34: 1804 (1901); 43: 2398 (1910)                         | 0.60  | 0.63  | 0.60                   | 0.23  | 0.18    |
| 00300108    | QUINIC ACID                     | 100122-20 | C07      | sample        | 77-95-2    | C7H12O6   | 192.17009 |                                                       | Cinchona spp.                                                     | undetermined activity | Be 75: 1009 (1932)                                                           | 3.70  | 1.70  | 0.21                   | 2.79  | 0.49    |
| 00300108    | QUININ                          | 100122-20 | C08      | sample        | 76-78-8    | C22H28O6  | 388.46486 | insecticide, antiamebic                               | Quassia amara, Picramnia exotica and Allantia glandulosa          | experimental          | JACS 60:1146 (1938); 72:375 (1950); Tetrahedron 15:100                       | 1.51  | 0.16  | 0.50                   | -0.93 | 0.31    |
| 003005025   | APRIN                           | 100122-20 | C09      | sample        | 26544-34-3 | C28H28O14 | 564.50466 |                                                       | parley seed; flowers of Anthelmis nobilis. 80% + other glycosides | undetermined activity | J Am Chem Soc 1953: 85; Can J Chem 42: 2085 (1965)                           | 1.13  | 0.72  | -0.32                  | -0.60 | 0.23    |
| 00300101    | BUXIN                           | 100122-20 | C10      | sample        | 3957-23-0  | C28H30O4  | 394.51545 |                                                       | Buxa orellana seeds                                               | undetermined activity | J Chem Soc 1961: 1625; JACS 108: 3016 (1986); Phytochemistry 29: 2551 (1990) | 0.20  | 0.55  | 0.20                   | 0.17  | 0.20    |
| 00203008    | JUAREZIC ACID                   | 100122-20 | C11      | sample        | 1552-94-9  | C11H10O2  | 174.20115 |                                                       | propolis                                                          |                       |                                                                              |       |       |                        |       |         |

| Compound ID | MoName                         | plate     | position | Content        | cas#                | Formula         | MoWt      | Bioactivity                                            | Source                                                           | Status                | Reference                                                 | Screen Score (z-score) |       |       |       | Average |
|-------------|--------------------------------|-----------|----------|----------------|---------------------|-----------------|-----------|--------------------------------------------------------|------------------------------------------------------------------|-----------------------|-----------------------------------------------------------|------------------------|-------|-------|-------|---------|
|             |                                |           |          |                |                     |                 |           |                                                        |                                                                  |                       |                                                           | rep1                   | rep2  | rep3  | rep4  |         |
| 01500815    | BETULIN                        | 100122-20 | H10      | sample         | 473-98-3            | C30H50O2        | 442.7318  |                                                        | Betula spp                                                       | undetermined activity | J Am Chem Soc 78: 2312 (1956)                             | 0.50                   | 0.73  | -0.55 | 0.00  | 0.17    |
| 01500817    | CARMINIC ACID                  | 100122-20 | H11      | sample         | 1260-17-9           | C22H20O14       | 508.3963  |                                                        | Dactylopus coccus (cochineal)                                    | undetermined activity |                                                           | 1.38                   | 0.47  | 5.74  | 0.99  | 2.15    |
|             | empty                          | 100122-21 | A01      | sample         |                     |                 |           |                                                        | NA                                                               |                       | NA                                                        | NA                     | NA    | NA    | NA    | NA      |
| 01500821    | BICUCULLINE (+)                | 100122-21 | A02      | sample         | 485-49-4            | C20H17NO6       | 367.36159 | GABA <sub>A</sub> antagonist                           | Dicentra cucullaria, Corydalis spp                               | experimental          | Col Czech Chem Commun, 29, 2328 (1964); Nature            | -1.75                  | -1.34 | 1.25  | -2.26 | -1.03   |
| 01500832    | CARYOPHYLLENE OXIDE            | 100122-21 | A03      | sample         | 1139-30-0           | C14H22O         | 206.33084 |                                                        | clove, cinnamon and many other oils                              | undetermined activity |                                                           | -1.20                  | -2.17 | -0.82 | -2.24 | -2.11   |
| 01500835    | URSOCYCLANIC ACID              | 100122-21 | A04      | sample         | 546-19-2            | C24H40O2        | 360.5852  |                                                        | C24H40O2                                                         | undetermined activity |                                                           | -1.21                  | -0.31 | -2.60 | -3.50 | -5.63   |
| 01500836    | CEPHALOSPORIN C SODIUM         | 100122-21 | A05      | sample         | 61-24-5             | C18H20N3NaO8S   | 437.4069  | antibacterial                                          | Cephalosporium acremonium                                        | BAN                   | Steroids 23:357 (1974)                                    | -0.60                  | -1.63 | -0.95 | -1.38 | -1.14   |
| 01500842    | CARYOPHYLLENE [-]              | 100122-21 | A06      | sample         | 87-44-5             | C14H22          | 190.33144 |                                                        | clove, cinnamon and many other oils                              | undetermined activity |                                                           | -6.70                  | -1.40 | -1.04 | 2.95  | -1.55   |
| 01500849    | CHOLEST-5-EN-3-ONE             | 100122-21 | A07      | sample         | 601-54-7            | C27H44O         | 384.65113 |                                                        | animal fats; mp 79-80 C                                          | undetermined activity | J Am Chem Soc 75: 3500 (1953)                             | -4.24                  | -1.61 | -1.29 | -3.20 | -2.59   |
| 01500851    | CHOLEST-4-EN-3-ONE             | 100122-21 | A08      | sample         | 666-03-8            | C27H46O         | 382.63519 |                                                        | cholesterol                                                      | undetermined activity | Hope Seyler's Z Physiol Chem 245:80 (1936); J Chem Soc    | -0.06                  | -0.06 | -1.17 | 0.14  | -2.27   |
| 01500854    | 7-OXOCHOLESTEROL               | 100122-21 | A09      | sample         | 566-28-9            | C27H44O2        | 400.65053 |                                                        | Clona copiosa                                                    | undetermined activity | Annalen 543, 240 (1940); JACS 71:2226 (1949); J Chem      | -6.99                  | -0.54 | -0.63 | 1.29  | -1.72   |
| 01500855    | CITRULLINE                     | 100122-21 | A10      | sample         | 627-77-0            | C6H13N3O3       | 175.1881  |                                                        | Citrullus vulgaris and the alga Grateloupia filicina             | undetermined activity | Tetrahedron 40: 235 (1984)                                | 2.29                   | -0.14 | 0.50  | -0.36 | 0.57    |
| 01500856    | CHOL-11-EN-3-ACID              | 100122-21 | A11      | sample         |                     | C24H38O3        | 372.55272 |                                                        | semisynthetic                                                    | undetermined activity |                                                           | -1.21                  | -0.61 | -0.32 | -0.61 | 0.36    |
|             | 0.04% JAK2inhb                 | 100122-21 | A12      | 0.04% jak2inhb |                     |                 |           |                                                        |                                                                  |                       |                                                           | -0.39                  | -2.55 | -1.85 | -2.90 | -1.92   |
|             | 0.04% DMSO                     | 100122-21 | B01      | 0.04% dmso     |                     |                 |           |                                                        |                                                                  |                       |                                                           | -0.41                  | -1.29 | -1.34 | 1.19  | -0.96   |
| 01500857    | BLURBIN                        | 100122-21 | B02      | sample         | 635-65-4            | C39H36NO4       | 584.67807 |                                                        | pigment mammalian gallstones, blood and urine                    | undetermined activity |                                                           | -1.01                  | -0.75 | 0.90  | -0.52 | -0.34   |
| 01500860    | S-BOCORYDINE (+)               | 100122-21 | B03      | sample         | 475-67-2            | C20H23NO4       | 341.41061 | sedative, cholinergic                                  | Dicentra canadensis, Atabartyby suaveolens and Corydalis         | experimental          | J Org Chem 19:1774 (1954); Aust J Chem 20: 1277 (1967)    | -1.31                  | -1.45 | 2.45  | -2.63 | -1.96   |
| 01500861    | CORALYNE CHLORIDE              | 100122-21 | B04      | sample         | 38989-38-7          | C22H22ClNO4     | 399.87794 | cytostatic, intercalating agent                        | synthetic                                                        | experimental          | Int J Immunopharmacol 6: 587 (1984); Nucleic Acids Res    | -0.67                  | -1.22 | -0.70 | -1.91 | -1.59   |
| 01500862    | BOLDINE                        | 100122-21 | B05      | sample         | 476-70-0            | C18H21NO4       | 327.38353 |                                                        | Peumus boldus                                                    | undetermined activity | J Chem Soc Perkin 1 1977: 706                             | -0.31                  | 2.06  | -1.29 | -2.58 | -0.49   |
| 01500864    | HARMALINE                      | 100122-21 | B06      | sample         | 394-21-1            | C18H19NO3       | 214.26933 | CNS stimulant, antiparkinsonian agent                  | Peppan harmala                                                   | experimental          | Ber 63: 120 (1950)                                        | -0.14                  | 0.02  | -0.49 | -1.60 | -0.78   |
| 01500866    | HARMANE                        | 100122-21 | B07      | sample         | 486-84-0            | C12H19NO2       | 182.2269  | intercalating agent, sedative                          | Arariba rubra,                                                   | experimental          | J Am Chem Soc 76: 2792 (1954)                             | 0.93                   | 0.08  | 0.65  | -2.13 | -0.12   |
| 01500869    | MIMOSINE                       | 100122-21 | B08      | sample         | 244-63-3            | C8H10N2O4       | 186.1799  | deplatory agent                                        | Mimosa and Leucaena spp                                          | experimental          | Z Physiol Chem 244: 153 (1936)                            | 0.75                   | 3.22  | 2.07  | -2.03 | 1.00    |
| 01500871    | NORHARMALIN                    | 100122-21 | B09      | sample         |                     | C11H9N2         |           |                                                        | Phytophytylum and Nocardia spp                                   | experimental          | J Chem Soc 119: 1602 (1921); 1929: 2926; Phytochemistry   | 1.30                   | 0.74  | -0.65 | -3.58 | -0.55   |
| 01500876    | CORYNANTHINE                   | 100122-21 | B10      | sample         | 123333-62-0         | C21H28N2O3      | 354.45297 | plant growth inhibitor, mutagen                        | bank of Pseudocinchona africana Chev.                            | undetermined activity | Helv Chim Acta 8: 1207 (1951)                             | -2.33                  | -0.71 | -0.86 | -2.66 | -0.56   |
| 01500877    | KYNURAMINE                     | 100122-21 | B11      | sample         |                     | C9H12N2O        | 164.20879 |                                                        | urine of various animals                                         | undetermined activity | Z Naturforsch Bb: 454 (1953)                              | 1.97                   | -0.03 | 0.10  | -0.98 | 0.27    |
|             | 0.04% JAK2inhb                 | 100122-21 | B12      | 0.04% jak2inhb |                     |                 |           |                                                        |                                                                  |                       |                                                           | -0.02                  | -0.47 | -1.74 | -1.12 | -1.34   |
|             | 0.04% DMSO                     | 100122-21 | C01      | 0.04% dmso     |                     |                 |           |                                                        |                                                                  |                       |                                                           | -2.25                  | -1.22 | -1.33 | -2.01 | -1.70   |
| 01500879    | KYNURENINE                     | 100122-21 | C02      | sample         |                     | C10H12N2O3      | 208.21874 |                                                        | mammalian urine                                                  | undetermined activity | J Am Chem Soc 71: 4158 (1955)                             | -1.15                  | -0.91 | 1.34  | -1.13 | -0.46   |
| 01500899    | ESCULETIN                      | 100122-21 | C03      | sample         | 305-01-1            | C9H8O4          | 178.14577 | antifungal                                             | Aesculus and Solanaceae spp                                      | experimental          |                                                           | -2.31                  | -0.30 | -0.88 | -0.58 | -1.02   |
| 01500904    | CHOLIC ACID, METHYL ESTER      | 100122-21 | C04      | sample         | 1446-36-8           | C25H42O5        | 422.81049 |                                                        | acid as primary bile constituent                                 | undetermined activity |                                                           | 0.41                   | 0.27  | -0.85 | 0.03  | -0.05   |
| 01500984    | GINKGOLIDE A                   | 100122-21 | C05      | sample         | 1591-75-5           | C20H24O11       | 404.0768  | antibacterial                                          | Ginkgo biloba                                                    | experimental          | J Am Chem Soc 93: 3546 (1971)                             | 2.78                   | 0.50  | -0.04 | -0.47 | 0.69    |
| 01500986    | GITOXIN                        | 100122-21 | C06      | sample         | 4562-36-1           | C41H64O14       | 780.95883 | cardiotonic                                            | Digitalis spp                                                    | experimental          | Chem Pharm Bull 18: 1080 (1970); Mol Pharmacol 11:653     | -0.35                  | -0.90 | -3.56 | -3.25 | -3.77   |
| 01500989    | 18alpha-GLYCYRRHETINIC ACID    | 100122-21 | C07      | sample         |                     | C38H68O4        | 470.68672 | antiinflammatory                                       | epimer of aglycone Glycyrrhiza glabra                            | experimental          |                                                           | -2.35                  | -0.97 | -0.40 | 0.42  | -0.82   |
| 01501012    | 3-HYDROXYFLAVONE               | 100122-21 | C08      | sample         | 577-85-5            | C15H10O3        | 238.24515 |                                                        | cabbage                                                          | undetermined activity |                                                           | 0.18                   | -1.04 | 0.10  | 0.61  | 0.37    |
| 01501019    | BERBAMINE HYDROCHLORIDE        | 100122-21 | C09      | sample         | 478-61-5 (beramine) | C37H42ClN2O6    | 681.66300 | antibacterial, skeletal muscle releasent               | Berberis spp                                                     | experimental          | J Indian Chem Soc 28: 225 (1951); 30: 705 (1953); Aust J  | 0.87                   | 1.61  | 0.43  | -1.08 | 0.25    |
| 01501017    | PIGROTOXININ                   | 100122-21 | C10      | sample         | 17617-45-7          | C18H16O6        | 292.29117 | convulsant, GABA receptor antagonist, ichthyotoxin     | Ananatis cocculus, Menispermum cocculus                          | experimental          | JACS 57: 1111 (1935); 79: 5550 (1957); Chem Rev 67: 441   | 0.91                   | 2.22  | -0.80 | -1.76 | 0.79    |
| 01504027    | CYTISINE                       | 100122-21 | C11      | sample         | 485-35-8            | C11H14N2O       | 190.24703 | antitumorlary, respiratory stimulant                   | Thermopsis lanceolata                                            | INH                   | J Chem Soc 1932: 2778; Marinische 289 Ed. 1700 (1932)     | 2.04                   | -0.43 | 0.23  | -0.43 | 0.50    |
|             | 0.11% JAK2inhb                 | 100122-21 | C12      | 0.11% jak2inhb |                     |                 |           |                                                        |                                                                  |                       |                                                           | -1.33                  | -3.43 | -0.09 | -2.21 | -1.76   |
|             | 0.11% DMSO                     | 100122-21 | D01      | 0.11% dmso     |                     |                 |           |                                                        |                                                                  |                       |                                                           | -3.26                  | 3.56  | 1.03  | -0.38 | 0.24    |
| 01501197    | PRIMULIN                       | 100122-21 | D02      | sample         | 491-78-1            | C18H19O3        | 238.24515 |                                                        | Primula spp                                                      | undetermined activity | Helv Chim Acta 24:297 (1941)                              | 2.26                   | -0.40 | 0.18  | -0.32 | 0.52    |
| 01501207    | KINETIN RIBOSIDE               | 100122-21 | D03      | sample         |                     | C19H17N5O5      | 347.33324 |                                                        | synthetic                                                        | undetermined activity |                                                           | 1.87                   | 1.14  | 0.47  | -0.18 | 0.71    |
| 01501208    | KARANJIN                       | 100122-21 | D04      | sample         | 521-88-0            | C17H10O4        | 278.26685 |                                                        | Derris and Tephrosia spp                                         | undetermined activity | Indian Acad Sci 17: 16 (1943)                             | 2.28                   | 1.20  | 1.24  | -0.18 | 1.13    |
| 01501212    | LINALDOL (+)                   | 100122-21 | D05      | sample         |                     | C10H18O         | 154.25436 |                                                        | Mentha arvensis and related essential oils                       | undetermined activity |                                                           | 0.77                   | -0.75 | 0.16  | 1.12  | 0.33    |
| 01502113    | AZASERINE                      | 100122-21 | D06      | sample         | 115-02-6            | C9H7NO4         | 173.12924 | antineoplastic, amino acid antagonist                  | Streptomyces fragilis                                            | USAN, INN             |                                                           | 2.21                   | 0.65  | -0.21 | 0.65  | 0.94    |
| 00330058    | CHLORPYRIFOS                   | 100122-21 | D07      | sample         | 2921-88-2           | C9H11ClN3O3PS   | 350.58972 | insecticide                                            | synthetic, DURSIBAN                                              | BAN                   |                                                           | 0.14                   | -0.19 | 0.07  | 0.52  | 0.14    |
| 01502223    | RESVERATROL                    | 100122-21 | D08      | sample         | 501-36-0            | C14H12O3        | 228.24994 | antifungal, antibacterial                              | Veratrum grandiflorum, Pinus sibirica, Vitis vinifera, Arachis   | experimental          | Aust J Chem 24:2427 (1971); Tet Lett 1972:2965;           | 1.12                   | 1.62  | 1.19  | 0.55  | 1.12    |
| 01502231    | 1,2-DICHOLOE (C-ly)            | 100122-21 | D09      | sample         | 528-57-1            | C2H2Cl2O        | 342.22031 |                                                        | Arachis sativa, hydrolysis of cellulose                          | undetermined activity | Phytochemistry 17: 1916 (1953)                            | -0.45                  | 0.22  | -2.80 | -1.91 | 0.16    |
| 01502235    | ASTAXANTHIN                    | 100122-21 | D10      | sample         | 71772-51-5          | C40H52O4        | 596.85804 |                                                        | Carotenoid pigment plant and animal sources                      | undetermined activity | Nature 184: 1714 (1959)                                   | 1.08                   | 0.63  | 1.55  | 0.22  | 0.55    |
| 01502237    | HARMOL HYDROCHLORIDE           | 100122-21 | D11      | sample         | 40580-83-4          | C12H11ClN2O     | 234.68727 | MAO inhibitor                                          | common plant alkaloid                                            | experimental          | Phytochemistry 19:1573 (1980)                             | 1.09                   | -0.07 | 0.04  | -1.71 | -0.16   |
|             | 0.11% JAK2inhb                 | 100122-21 | D12      | 0.11% jak2inhb |                     |                 |           |                                                        |                                                                  |                       |                                                           | -1.39                  | -4.26 | -4.14 | -4.10 | -3.47   |
|             | 0.11% JAK2inhb                 | 100122-21 | E01      | 0.11% jak2inhb |                     |                 |           |                                                        |                                                                  |                       |                                                           | -0.21                  | -1.18 | -0.22 | 1.95  | -0.25   |
| 01502228    | DEOXYADENOSINE                 | 100122-21 | E02      | sample         | 16373-93-6          | C10H13N5O3      | 251.24681 |                                                        | synthetic                                                        | undetermined activity |                                                           | 0.46                   | 0.60  | -0.36 | 0.28  | 0.25    |
| 01502242    | SCOPOLIN                       | 100122-21 | E03      | sample         | 92-61-5             | C10H8O4         | 192.17286 | NO synthesis (inducible) inhibitor, anticoagulant      | Scopolia spp                                                     | experimental          | J Org Chem 26: 1215 (1961)                                | 0.58                   | 0.37  | -0.13 | 0.48  | 0.33    |
| 01502244    | AMYGDALEIN                     | 100122-21 | E04      | sample         | 2980-52-1           | C20H27NO11      | 457.48329 | antitumorlary, experimental antineoplastic             | Rosaceae spp                                                     | experimental          |                                                           | 0.18                   | 1.08  | -0.58 | -0.18 | 0.72    |
| 01502253    | HEMATIN                        | 100122-21 | E05      | sample         | 475-25-2            | C16H12O6        | 300.27044 |                                                        | logwood, Haematoxylin spp                                        | undetermined activity | J Chem Soc 93: 115 (1908)                                 | 0.91                   | 1.37  | -0.07 | 1.16  | 0.67    |
| 01502247    | FISETIN                        | 100122-21 | E06      | sample         | 528-48-3            | C15H10O6        | 286.24335 | antioxidant                                            | Rhus and Acalcia spp                                             | experimental          | Biochem J 77: 315 (1960)                                  | -1.11                  | -0.07 | 1.07  | -0.29 | -0.10   |
| 01502252    | MONOCROTALIN                   | 100122-21 | E07      | sample         | 315-22-0            | C16H22NO6       | 325.36481 | antineoplastic, insect sterlant                        | Crotalaria spp                                                   | experimental          | J Am Chem Soc 72: 158 (1950)                              | -0.44                  | -0.08 | -0.50 | 0.34  | -0.17   |
| 01502281    | QUERCETRINOL                   | 100122-21 | E08      | sample         | 194-140-9           | C21H30O12       | 431.18603 |                                                        | Crotalaria spp                                                   | undetermined activity |                                                           | 0.12                   | 0.38  | 1.15  | 0.19  | 0.94    |
| 01503346    | URIDINE TRIPHOSPHATE TRISODIUM | 100122-21 | E09      | sample         | 19817-92-6          | C9H12N2Na3O15P3 | 505.09119 | psychostimulant                                        | yeast                                                            | experimental          | JACS 75:5449 (1953); 105:115 (1983)                       | -0.72                  | 2.25  | 0.22  | -1.57 | 0.40    |
| 01503427    | ALON                           | 100122-21 | E10      | sample         | 5133-19-7           | C21H22O10       | 434.04349 | carbathic, laxative                                    | aloe                                                             | BAN                   | J Chem Soc 1932: 2573                                     | 1.85                   | 2.29  | 1.04  | 2.19  | 1.34    |
| 01503620    | SAPROLE                        | 100122-21 | E11      | sample         | 94-57-1             | C10H10O2        | 162.19    | anesthetic (topical) and antiseptic, pediculicide      | J Chem Soc 13: 448 (1948)                                        | experimental          |                                                           | 1.94                   | 1.70  | 0.00  | 0.00  | 0.75    |
|             | 0.11% DMSO                     | 100122-21 | E12      | 0.11% dmso     |                     |                 |           |                                                        |                                                                  |                       |                                                           | 0.69                   | -1.25 | 0.37  | -1.40 | -0.40   |
|             | 0.11% JAK2inhb                 | 100122-21 | F01      | 0.11% jak2inhb |                     |                 |           |                                                        |                                                                  |                       |                                                           | -4.68                  | -1.68 | -3.41 | 1.77  | -1.95   |
| 01503639    | RAUWOLFSCINE HYDROCHLORIDE     | 100122-21 | F02      | sample         | 2021-32-1           | C21H27ClNO23    | 390.91394 | alpha2 adrenergic antagonist                           | Rauwolfia, Aspidosperma and Vinca spp                            | experimental          |                                                           | -0.43                  | -0.39 | -0.83 | -0.67 | -0.63   |
| 01503640    | PARTHENOLIDE                   | 100122-21 | F03      | sample         | 6554-84-1           | C18H20O3        | 248.32485 | SH1 antagonist, antineoplastic, smooth muscle relaxant | Chrysanthemum parthenium, Michelia champaca                      | experimental          | Tetrahedron 21:1509 (1965); Phytochemistry 17:957 (1978); | 1.14                   | 1.94  | 0.23  | 1.27  | 0.71    |
| 01503802    | AZADIRACHTIN                   | 100122-21 | F04      | sample         | 11141-17-6          | C35H44O16       | 720.73133 | antifeedant, insecticide                               | Melia azadirach and Azadirachta indica                           | experimental          | Phytochemistry 12: 391 (1973)                             | -1.34                  | 1.71  | 0.31  | 1.72  | 1.27    |
| 01503805    | DESACETYLCOLFORSPIN            | 100122-21 | F05      | sample         | 64657-20-1          | C20H32O6        | 368.47444 |                                                        | Coleus forskohlii, 8,13-epoxy-1,6,7,8-tetrahydroxy-14-labden-11- | undetermined activity |                                                           | 0.34                   | -1.40 | 0.70  | -0.23 | -0.24   |
| 01503815    | CEVAJINE                       | 100122-21 | F06      | sample         | 62-59-9             | C32H48NO9       | 591.74893 | antihypertensive                                       | Veratrum alba, contains 20% veratridine                          | experimental          |                                                           | 1.01                   | -0.65 | -     |       |         |

| Compound ID | MoNAme                                             | plate     | position | Content | cas#                    | Formula       | MoWt      | Bioactivity                                                                                          | Source                                                                                                                | Status                | Reference                                                                                                                                                   | rep1  | rep2   | Screen Score (z-score) | rep3   | rep4 | Average |
|-------------|----------------------------------------------------|-----------|----------|---------|-------------------------|---------------|-----------|------------------------------------------------------------------------------------------------------|-----------------------------------------------------------------------------------------------------------------------|-----------------------|-------------------------------------------------------------------------------------------------------------------------------------------------------------|-------|--------|------------------------|--------|------|---------|
| 01050410    | PICROPODOPHYLLIN                                   | 100122-22 | B09      | sample  | 477-44-7                | C22H20O8      | 414.1584  | Insulin growth factor 1 receptor inhibitor, antineoplastic                                           | Podophyllum peltatum; epimer of podophyllotoxin; 10% cytotoxicity of podophyllotoxin                                  | experimental          | JACS 73: 2909 (1951); 75: 1308 (1953); J Med Chem 32: 604 (1989); Pharmacol Ther 59: 163 (1993); Cancer Res 64: 238 (2004); Int. J. Cancer 121: 1857 (2007) | 0.11  | -0.74  | 0.67                   | -0.01  |      | 0.01    |
| 01050419    | 7-HYDROXYFLAVONE                                   | 100122-22 | B10      | sample  | 6665-86-7               | C15H10O3      | 238.24515 | antifungal, analgesic                                                                                | Virola spp                                                                                                            | experimental          | Mycol Res 101:920 (1997); Indian J Exp Biol 38:1172 (2000); Chem Pharm Bull 52:1255 (2004)                                                                  | 0.52  | -0.41  | 0.49                   | -2.43  |      | -0.46   |
| 010504614   | GYROMITRIN                                         | 100122-22 | B11      | sample  | 16568-02-8              | C4H8N2O       | 100.12116 | hepatotoxic, carcinogen                                                                              | Gyromitra mushroom species; metabolized to the hepatotoxin formylethylmethyldiazine                                   | experimental          | Arch Pharmacol 302:294 (1968); Z Lebensm Unters Forsch 160:325 (1976); Cancer Res 37:3458 (1977); J Appl Toxicol 11:235 (1991)                              | 0.47  | -0.66  | 0.83                   | 0.15   |      | 0.20    |
| 010504800   | 0.04% JAK2inhb<br>0.04% DMSO<br>CHRYSANTHEMIC ACID | 100122-22 | B12      | sample  | 10453-89-1              | C10H16O2      | 168.23782 | esters as insecticide                                                                                | esters as constituent of pyrethrum flowers                                                                            | experimental          | J Chem Soc 1945: 283                                                                                                                                        | 0.38  | -1.75  | 2.13                   | -3.03  |      | -0.57   |
| 010505002   | LAPPAONITINE                                       | 100122-22 | C02      | sample  | 32854-75-4              | C32H44N2O8    | 584.71608 | analgesic, antianthymic                                                                              | Aconitum spp and Delphinium cashianarium                                                                              | experimental          | Tet Lett 1964:2711; Can J Chem 45:969 (1967); J Nat Prod 42:615 (1979); Planta Medica 64:22 (1998); Mol Pharm 59:183 (2001)                                 | -1.28 | -0.05  | -1.16                  | 0.05   |      | -0.61   |
| 010505006   | DIHYDROMYRISTICIN                                  | 100122-22 | C04      | sample  | 607-01-0                | C11H14O3      | 194.23243 | GSH transferase inducer                                                                              | derivative; myristicin                                                                                                | experimental          | J Agr Food Chem 40:107 (1992)                                                                                                                               | -0.39 | -1.81  | -0.81                  | -1.60  |      | -1.15   |
| 010505010   | EUPHORBIASTEROID                                   | 100122-22 | C05      | sample  | 28648-08-4              | C32H46O8      | 552.8708  | Euphorbia lathyris, Macaranga tanarius                                                               | Tet Lett 1970:2241, 3071; Experientia 27:1393 (1971)                                                                  | undetermined activity |                                                                                                                                                             | -0.43 | -0.57  | -0.37                  | -0.57  |      | -1.07   |
| 010505018   | ASTRAGALOSIDE IV                                   | 100122-22 | C06      | sample  | 84687-43-4              | C41H68O14     | 784.90071 | Astragalus species                                                                                   | Chem Pharm Bull 31:689, 698, 709, 716 (1983)                                                                          | undetermined activity |                                                                                                                                                             | -6.58 | 0.71   | -0.10                  | 0.06   |      | -1.48   |
| 010505030   | DEMETHYLNOSIBIN                                    | 100122-22 | C07      | sample  | 2174-59-6               | C20H20O8      | 388.3776  | Citrus, Sideritis, Heteropappus and Thymus spp; Mentha piperita, Amaranthus panicum                  | Tetrahedron 8:64 (1960); Phytochemistry 11:2283 (1972); 24:1027 (1985)                                                | undetermined activity |                                                                                                                                                             | -0.68 | -1.11  | -0.92                  | -1.97  |      | -1.17   |
| 010505034   | BACCATIN III                                       | 100122-22 | C08      | sample  | 27548-93-2              | C31H38O11     | 586.64191 | Salvia baccata                                                                                       | J Org Chem 51:3239 (1986)                                                                                             | undetermined activity |                                                                                                                                                             | 0.06  | -0.12  | 0.15                   | 0.05   |      | 0.04    |
| 010505080   | SALVINORIN A                                       | 100122-22 | C09      | sample  | 83729-01-5              | C23H28O8      | 432.47481 | k-opioid receptor agonist, psychotropic                                                              | J Chem Soc 1982:2505; J Org Chem 49:4716 (1984); Chem Lett 1989:2015                                                  | experimental          |                                                                                                                                                             | -0.04 | -1.09  | 1.25                   | -1.24  |      | -0.28   |
| 010505121   | 11a-ACETOXYPROGESTERONE                            | 100122-22 | C10      | sample  | 2268-98-6               | C23H32O4      | 372.50909 | metabolite of progesterone                                                                           | semisynthetic                                                                                                         | undetermined activity | Endocrinology 53:221 (1953); Biochem Biophys Res Commun 319:677 (2004)                                                                                      | -0.22 | -1.30  | -1.40                  | -2.04  |      | -1.24   |
| 010505123   | 21-ACETOXYPREGNENOLONE                             | 100122-22 | C11      | sample  | 566-79-8                | C23H34O4      | 374.52503 | precursor in corticoid biosynthesis, derivative                                                      | semisynthetic                                                                                                         | undetermined activity | PNAS 54:4885 (1957)                                                                                                                                         | 2.30  | -0.87  | 0.29                   | -0.57  |      | 0.29    |
| 010505127   | 0.11% JAK2inhb<br>0.11% DMSO<br>GOSSYPIN           | 100122-22 | C12      | sample  | 652-78-8                | C21H20O13     | 480.38575 | Gossypium spp, Hibiscus spp                                                                          | Proc Indian Acad Sci Sect A: 24:352, 375 (1946); 25:397 (1947)                                                        | undetermined activity |                                                                                                                                                             | -2.72 | -2.13  | 2.20                   | -2.61  |      | -1.31   |
| 010505129   | PLUMBAGIN                                          | 100122-22 | D03      | sample  | 481-42-5                | C11H8O3       | 188.18461 | antibacterial, antifungal, tuberculostatic, antifeedant (African army worms)                         | Aristea, Diospyros & Plumbago spp; Dyerophyton, Drosera, Dioncophyllum, Napehrnia, Silybricium and Spargania tricolor | experimental          | JACS 58:572 (1936); Indian J Chem 6:681 (1968); Fiterapara 1990:387                                                                                         | -0.16 | 0.89   | -1.42                  | -1.07  |      | -0.64   |
| 010505130   | 3,4-DIMETHOXYCINNAMIC ACID                         | 100122-22 | D04      | sample  | 14737-89-4              | C11H12O4      | 208.21589 | Piper nitheticum, Veronica virginica                                                                 | undetermined activity                                                                                                 |                       |                                                                                                                                                             | -0.27 | -1.07  | -0.24                  | -1.79  |      | -0.84   |
| 010505132   | 2',4'-DIHYDROXYCHALCONE                            | 100122-22 | D05      | sample  | 1779-30-3               | C18H12O3      | 240.26109 | anthelmintic, antiulcer                                                                              | Flemingia chapparr, Ceratola ericoides, Apocynaceae, Foursaria spp                                                    | experimental          | J Chem Soc 1937:1737; Tetrahedron 27:2111 (1971); Planta Med 58:389 (1992)                                                                                  | 1.07  | 1.75   | 3.19                   | 3.27   |      | 2.32    |
| 010505134   | MANGIFERIN                                         | 100122-22 | D06      | sample  | 4773-98-0               | C19H18O11     | 422.34871 | MAO inhibitor, immunostimulant                                                                       | J Mangifera indica, Iris & Salacia spp, Aphloia, Athyrium, Anemathena, Belamcanda chinensis, Hebeasaur ussuriense     | experimental          | J Chem Soc (C) 1986:1685; Phytochemistry 6:741, 1597 (1967); Tetrahedron 23:1363 (1967); Pharm Res 3:307 (1986); Naturwissenschaften 59:651 (1972)          | -0.12 | -0.19  | -0.96                  | -0.49  |      | -0.44   |
| 010505135   | PIPLARTINE                                         | 100122-22 | D07      | sample  | 20069-09-4              | C17H19NO5     | 317.34468 | anti-asthma, antibronchitis                                                                          | Piper spp                                                                                                             | experimental          | Tetrahedron 23:1789 (1967); Phytochemistry 13:2327 (1974)                                                                                                   | 0.21  | 0.95   | 3.58                   | 1.33   |      | 1.52    |
| 010505140   | 2',4'-DIHYDROXY-3',4',6'-TRIMETHOXYCHALCONE        | 100122-22 | D08      | sample  | 112572-59-5             | C18H18O6      | 330.34056 | Viscum album (glucoside)                                                                             | undetermined activity                                                                                                 |                       |                                                                                                                                                             | -0.52 | 0.36   | 0.06                   | 2.48   |      | 0.59    |
| 010505141   | 2',4'-DIHYDROXYCHALCONE                            | 100122-22 | D09      | sample  | 13323-66-5              | C18H12O3      | 240.26109 | Adiantum vesica (as glucoside)                                                                       | undetermined activity                                                                                                 |                       |                                                                                                                                                             | 0.80  | 1.53   | 0.76                   | 0.04   |      | 0.78    |
| 010505142   | 2',5'-DIHYDROXY-4-METHOXYCHALCONE                  | 100122-22 | D10      | sample  | 6342-92-3               | C18H14O4      | 270.28758 | Cassia javanica                                                                                      | undetermined activity                                                                                                 |                       |                                                                                                                                                             | 1.19  | 0.42   | 0.97                   | 2.06   |      | 1.16    |
| 010505143   | GOSSYPETIN                                         | 100122-22 | D11      | sample  | 489-35-0                | C19H18O8      | 318.24215 | widespread in plants                                                                                 | undetermined activity                                                                                                 |                       |                                                                                                                                                             | -0.02 | -0.10  | 0.99                   | 0.45   |      | 0.18    |
| 010505144   | 0.11% JAK2inhb<br>0.11% JAK2inhb<br>HARPAGOSIDE    | 100122-22 | D12      | sample  | 19210-12-9              | C23H28O11     | 480.47301 | Melittis melissophyllum, Harpagophyllum procumbens                                                   | undetermined activity                                                                                                 |                       |                                                                                                                                                             | -2.75 | -3.99  | -0.48                  | -2.36  |      | -2.40   |
| 010505151   | 0.11% JAK2inhb<br>HARPAGOSIDE                      | 100122-22 | E01      | sample  | 19210-12-9              | C23H28O11     | 480.47301 | Melittis melissophyllum, Harpagophyllum procumbens                                                   | undetermined activity                                                                                                 |                       |                                                                                                                                                             | -3.60 | -1.00  | -3.35                  | -3.05  |      | -2.75   |
| 010505152   | 2',4'-DIHYDROXY-4-METHOXYCHALCONE                  | 100122-22 | E02      | sample  | 61874-01-1              | C18H14O4      | 270.28758 | Bauhinia manca                                                                                       | undetermined activity                                                                                                 |                       |                                                                                                                                                             | -1.02 | 0.59   | 1.83                   | 0.24   |      | 0.41    |
| 010505159   | DESOXYHYDRAURIC ACID                               | 100122-22 | E03      | sample  | 16109-05-7              | C19H12O2      | 258.09286 | acetylcholinesterase inhibitor, antiParkinsonism                                                     | Bauhinia manca                                                                                                        | experimental          | Naturwissenschaften 59:651 (1972)                                                                                                                           | -3.30 | -30.46 | -26.93                 | -24.85 |      | -28.14  |
| 010505153   | 2',3'-DIHYDROXY-4',6'-TRIMETHOXYCHALCONE           | 100122-22 | E04      | sample  | 38186-71-9              | C18H18O6      | 330.34056 | Mertensia calycotyn                                                                                  | undetermined activity                                                                                                 |                       |                                                                                                                                                             | 2.52  | 3.41   | -1.14                  | -0.79  |      | 0.23    |
| 010505174   | GARLICIN                                           | 100122-22 | E06      | sample  | 2179-57-9               | C6H10S2       | 146.2746  | antineoplastic, antibacterial, apoptosis inducer, insecticide                                        | Allium spp, Descurainia sophia                                                                                        | experimental          | Phytochemistry 13:1561 (1974)                                                                                                                               | -0.45 | 0.47   | -0.42                  | 0.59   |      | 0.05    |
| 010505175   | ASITAC ACID                                        | 100122-22 | E07      | sample  | 464-92-6                | C30H48O5      | 488.71406 | wound healing, experimental carcinogen                                                               | Dipterocarpus pilosus, Dryobalanops aromatica                                                                         | experimental          | Pharmazie 20:441 (1965); J Org Chem 40:1567 (1975); Food Chem Toxicol 26:297 (1988); Cancer Res 35:3492 (1983); Biochim Biophys Acta 1315:15 (1986)         | 0.63  | -1.11  | 2.90                   | 0.35   |      | 0.69    |
| 010505176   | AURAPTENE                                          | 100122-22 | E08      | sample  | 495-02-3                | C19H22O3      | 298.38539 | antineoplastic, apoptosis inducer                                                                    | Bull Soc Chim Fr 1959:880; 1961:1586; J Chem Soc 1961:646; Phytochemistry 8:917 (1969)                                | undetermined activity |                                                                                                                                                             | 0.26  | -0.16  | -0.82                  | -0.62  |      | -0.33   |
| 010505190   | L(-)-ALLIN                                         | 100122-22 | E09      | sample  | 556-27-4(-)             | C6H11NO3S     | 177.22347 | antibacterial, antioxidant                                                                           | Citrus aurantium, Feronia elephantum, Aegle marmelos, Libanotis intermedia                                            | experimental          | Chem Pharm Bull 1:119 (1959); Cancer Res 12:2550 (1958); Mutat Res 480:201 (2001)                                                                           | 2.26  | 0.29   | 0.22                   | 0.24   |      | 0.75    |
| 010505195   | EPITESTOSTERONE                                    | 100122-22 | E10      | sample  | 481-30-1                | C19H28O2      | 288.43381 | coccone with testosterone in mammals                                                                 | Helv Chim Acta 34:481 (1951); Phytochemistry 15:521 (1976)                                                            | undetermined activity |                                                                                                                                                             | 1.04  | 0.07   | 0.70                   | 0.46   |      | 0.57    |
| 010505217   | RHODOCLADONIC ACID                                 | 100122-22 | E11      | sample  | 26984-15-6              | C19H18O8      | 318.24215 | Cladonia spp                                                                                         | undetermined activity                                                                                                 |                       |                                                                                                                                                             | -3.62 | 0.50   | 1.31                   | 1.96   |      | 0.04    |
| 010505240   | 0.11% DMSO<br>0.11% JAK2inhb                       | 100122-22 | E12      | sample  | 19210-12-9              | C23H28O11     | 480.47301 | Melittis melissophyllum, Harpagophyllum procumbens                                                   | undetermined activity                                                                                                 |                       |                                                                                                                                                             | 0.22  | -0.76  | 0.67                   | -1.33  |      | -0.30   |
| 010505234   | AVOCADYNE                                          | 100122-22 | F01      | sample  | 34524-38-4              | C17H32O3      | 284.44279 | antibacterial, antifungal                                                                            | Persea spp                                                                                                            | experimental          | Phytochemistry 12: 937 (1973)                                                                                                                               | -2.78 | -3.13  | -3.37                  | 0.82   |      | -2.12   |
| 010505240   | LUPANYL ACID HYDROCHLORIDE                         | 100122-22 | F02      | sample  | 112572-59-5             | C17H32O3      | 284.44279 | antibacterial, antifungal                                                                            | Persea spp                                                                                                            | experimental          | An Acad Brasl Cienc 42 (suplemento): 45 (1970); Phytochemistry 25:4617 (1969)                                                                               | -0.17 | -0.69  | -0.97                  | -0.22  |      | -0.51   |
| 010505242   | LUPANINE PERCHLORATE                               | 100122-22 | F03      | sample  | 550-90-3 (base)         | C14H25NO2     | 288.82055 | Anabasis aphylla                                                                                     | undetermined activity                                                                                                 |                       |                                                                                                                                                             | -0.72 | 1.01   | -1.02                  | 0.12   |      | -0.15   |
| 010505254   | THEANINE                                           | 100122-22 | F04      | sample  | 550-90-3 (base)         | C15H25NO2     | 288.82055 | Lupinus and Cystitis spp                                                                             | undetermined activity                                                                                                 |                       |                                                                                                                                                             | -0.35 | -0.04  | -0.58                  | 2.70   |      | 0.43    |
| 010505255   | HUPERZINE A                                        | 100122-22 | F05      | sample  | 3081-61-6               | C7H14N2O3     | 174.20123 | Thea sinensis                                                                                        | undetermined activity                                                                                                 |                       |                                                                                                                                                             | -0.47 | 1.18   | -0.19                  | -0.17  |      | 0.09    |
| 010505255   | HUPERZINE A                                        | 100122-22 | F06      | sample  | 102518-79-6             | C19H18NO2     | 242.32351 | anticholinesterase, cognition enhancer                                                               | Lycopodium spp                                                                                                        | experimental          | JACS 64: 1021 (1942); J Sci Food Agric 5: 597 (1954); Biochim Biophys Acta 39: 462 (1960)                                                                   | 0.71  | 0.89   | -0.49                  | -0.21  |      | 0.23    |
| 010505257   | ICARIN                                             | 100122-22 | F07      | sample  | 489-32-7                | C33H40O15     | 676.67775 | hepatoprotective                                                                                     | Epidemium spp                                                                                                         | experimental          | Tet Lett 1960 (10): 26; Can J Chem 64: 837 (1986); Adv Med 1: 175 (1992)                                                                                    | 0.08  | 1.12   | 2.69                   | 0.28   |      | 1.04    |
| 010505268   | NOBLETIN                                           | 100122-22 | F08      | sample  | 478-01-3                | C21H22O8      | 402.40469 | matrix metalloproteinase inhibitor, antineoplastic                                                   | Citrus spp                                                                                                            | experimental          | Phytochemistry 12: 937 (1973)                                                                                                                               | -0.36 | -0.88  | -0.54                  | -1.43  |      | -0.80   |
| 010505269   | TANGERITIN                                         | 100122-22 | F09      | sample  | 481-53-8                | C20H20O7      | 372.3782  | Citrus spp, Fortunella japonica                                                                      | undetermined activity                                                                                                 |                       |                                                                                                                                                             | 0.35  | -0.08  | 0.47                   | -0.97  |      | -0.06   |
| 010505278   | 3-HYDROXY-3',4'-DIMETHOXYFLAVONE                   | 100122-22 | F10      | sample  | 6889-80-1               | C17H14O5      | 298.20813 | synthetic                                                                                            | synthetic                                                                                                             | undetermined activity |                                                                                                                                                             | 0.91  | 2.59   | 1.25                   | -0.77  |      | 1.00    |
| 010505297   | PERILLYL ALCOHOL                                   | 100122-22 | F11      | sample  | 536-59-4, 18457-55-1    | C10H16O       | 152.23842 | antineoplastic, apoptosis inducer; skin irritant, LD50(rat) 2100 mg/kg po                            | Ocimum gratissimum                                                                                                    | experimental          | Tetrahedron 32: 565 (1976); Lebensmittelchem 39: 9 (1985)                                                                                                   | -0.14 | 0.09   | 0.66                   | 0.41   |      | 0.25    |
| 010505326   | 0.04% DMSO<br>0.04% JAK2inhb                       | 100122-22 | F12      | sample  | 19210-12-9              | C23H28O11     | 480.47301 | Melittis melissophyllum, Harpagophyllum procumbens                                                   | undetermined activity                                                                                                 |                       |                                                                                                                                                             | 0.05  | -0.33  | 0.36                   | -0.12  |      | -0.01   |
| 010505326   | SOLANESYL ACETATE                                  | 100122-22 | G01      | sample  | 700-06-1                | C47H76O2      | 673.12857 | Nicotiana tabacum; Murraya exotica; Pinus spp                                                        | undetermined activity                                                                                                 |                       |                                                                                                                                                             | -1.91 | -1.51  | -2.94                  | -1.52  |      | -1.97   |
| 010505320   | INDOLE-3-CARBINOL                                  | 100122-22 | G02      | sample  | 700-06-1                | C9H9NO        | 147.17818 | antineoplastic                                                                                       | Brassica spp                                                                                                          | experimental          | Anticancer Res 15:709 (1995); Biochem Mol Biol Int 36:125 (1996)                                                                                            | -5.56 | 2.01   | -1.29                  | 0.01   |      | -1.21   |
| 010505325   | SOLANESOL                                          | 100122-22 | G03      | sample  | 13190-97-1              | C45H74O       | 631.00903 | Nicotiana tabacum; Betaulapenol 9: mp 42 C                                                           | undetermined activity                                                                                                 |                       |                                                                                                                                                             | 0.64  | 0.94   | 0.33                   | 0.97   |      | 0.72    |
| 010505302   | GENETICIN                                          | 100122-22 | G05      | sample  | 108321-42-2, 49863-47-0 | C20H44N4O18S2 | 692.71768 | antibacterial                                                                                        | Micromonospora spp, G-418                                                                                             | experimental          | Biochem J 102:313, 325 (1966); 128: 11P (1972); Nature 196: 212, 1964; Phytochemistry 39:1383 (1995); J Nat Prod 46: 174 (1983); J Org Chem 54:3390 (1989)  | 0.22  | 1.58   | -0.06                  | 0.77   |      | 0.58    |
| 010505334   | SECURINE                                           | 100122-22 | G06      | sample  | 5610-40-2               | C13H18NO2     | 217.27    | GABA receptor blocker, CNS stimulant                                                                 | Securinega spp and Phyllanthus discoides                                                                              | INN                   | Chem Ind 1957: 47; Phytochemistry 14: 309 (1975)                                                                                                            | -1.67 | 0.47   | -2.00                  | -2.37  |      | -1.39   |
| 010505345   | CURCUMIN                                           | 100122-22 | G07      | sample  | 458-37-7                | C21H20O6      | 368.38995 | antileptic, antiinflammatory, bile stimulant; antibacterial, antifungal, lipoycoylcoenzyme inhibitor | Curcuma spp                                                                                                           | experimental          | Chem Ind 1957: 47; Phytochemistry 14: 309 (1975)                                                                                                            | 2.17  | 1.04   | 0.25                   | 0.33   |      | 0.80    |
| 010505380   | 3,4',5,6,7-PENTAMETHOXYFLAVONE                     | 100122-22 | G08      | sample  | 4472-73-5               | C20H20O7      | 372.3782  | Citrus spp                                                                                           | undetermined activity                                                                                                 |                       |                                                                                                                                                             | 1.49  | 0.21   | -0.16                  | -0.09  |      | 0.36    |
| 010505381   | SNENSETIN                                          | 100122-22 | G09      | sample  | 2306-27-8               | C29H40O7      | 508.61705 | Citrus spp                                                                                           | undetermined activity                                                                                                 |                       |                                                                                                                                                             | -0.42 | -0.13  | -0.58                  | -0.55  |      | -0.42   |
| 010505382   | 5-HYDROXY-2',4',7,8-TETRAMETHOXYFLAVONE            | 100122-22 | G10      | sample  | 123316-41-0             | C19H18O7      | 368.35111 | Citrus spp, Limnophylla rugosa                                                                       | undetermined activity                                                                                                 |                       |                                                                                                                                                             | 0.98  | 0.78   | 0.28                   | 0.22   |      | 0.57    |
| 010505383   | HEXAMETHYLQUERCETAGETIN                            | 100122-22 | G11      | sample  | 1251-84-9               | C21H22O8      | 402.40469 | Citrus spp                                                                                           | undetermined activity                                                                                                 |                       |                                                                                                                                                             | -0.37 | -1.38  | 0.99                   | 1.16   |      | 0.10    |
| 010505384   | 0.04% DMSO<br>0.04% JAK2inhb                       | 100122-22 | G12      | sample  | 19210-12-9              | C23H28O11     | 480.47301 | Melittis meliss                                                                                      |                                                                                                                       |                       |                                                                                                                                                             |       |        |                        |        |      |         |

| Compound ID | MoName                                   | plate     | position | Content        | cas#       | Formula    | MoWt      | Bioactivity                               | Source                                                                             | Status                                                 | Reference                                                                                                                                                          | rep1  | rep2  | Screen Score (z-score) | rep4  | Average |
|-------------|------------------------------------------|-----------|----------|----------------|------------|------------|-----------|-------------------------------------------|------------------------------------------------------------------------------------|--------------------------------------------------------|--------------------------------------------------------------------------------------------------------------------------------------------------------------------|-------|-------|------------------------|-------|---------|
| 0171001     | ANDROSTA-1,4-DIEN-3,17-DIONE             | 100122-23 | B02      | sample         | 897-061    | C19H24O2   | 284.40193 |                                           | mammary neoplasms; cholesterol metabolite                                          | undetermined activity                                  | J Am Chem Soc 80: 6148 (1958); 83: 4627 (1961)                                                                                                                     | 0.85  | -0.30 | -0.50                  | 0.22  | 0.07    |
| 0170160     | HYDROXYPROGESTERONE                      | 100122-23 | B03      | sample         | 3168-01-2  | C21H30O3   | 330.47145 | progestagen                               | urine and blood                                                                    | INN, BAN                                               |                                                                                                                                                                    | -0.07 | -0.85 | 1.90                   | -0.61 | 0.09    |
| 0180018     | LIMONIN                                  | 100122-23 | B04      | sample         | 1180-71-8  | C28H38O3   | 470.5242  |                                           | Citrus, Evodia, Dictamnus and Luvunga spp                                          | undetermined activity                                  | JACS 62 1307 (1940); J Chem Soc 1961:255; Citrus Sci Technol 1355 (1977)                                                                                           | -0.38 | -0.61 | -1.52                  | -0.49 | -0.75   |
| 0180009     | GUAIOL(-)                                | 100122-23 | B05      | sample         | 489-86-1   | C19H26O    | 222.37387 |                                           | Callitris intratropica, Eucalyptus maculata, Drimys lanceolata                     | undetermined activity                                  | Tetrahedron 13: 306 (1961)                                                                                                                                         | -0.36 | -1.04 | -0.60                  | -2.85 | -1.21   |
| 0200015     | METHYL BENZOATE                          | 100122-23 | B06      | sample         | 100-91-0   | C17H14O2   | 260.37963 |                                           | derivative                                                                         | undetermined activity                                  |                                                                                                                                                                    | 0.28  | -0.71 | -1.62                  | -2.28 | -1.08   |
| 0230025     | 1R,2S-PHENYLPROPYLAMINE                  | 100122-23 | B07      | sample         | 14538-15-4 | C9H13NO    | 151.21008 | decongestant                              | C9H13NO vulgaris (MaHuang)                                                         | experimental                                           | Phytochemistry 16: 9 (1977)                                                                                                                                        | -0.03 | 0.47  | -0.58                  | -0.24 | -0.08   |
| 0230028     | KANIC ACID                               | 100122-23 | B08      | sample         | 487-79-6   | C10H15NO4  | 213.23535 | glutamate receptor agonist, antihelmintic | Digenia simplex                                                                    | INN, JAN                                               |                                                                                                                                                                    | -0.25 | 1.00  | -1.98                  | 0.66  | -0.14   |
| 0230018     | LOBARIC ACID                             | 100122-23 | B09      | sample         |            | C29H28O8   | 456.49711 |                                           | lichen of the genus Stereocaulum and others                                        | undetermined activity                                  | Z Naturforsch 21b: 734 (1966)                                                                                                                                      | 0.29  | 1.12  | -0.08                  | 0.88  | 0.75    |
| 00100743    | HOMOEPYROCARPIN                          | 100122-23 | B10      | sample         | 605-91-7   | C17H16O4   | 284.31467 |                                           | mb 82-84 C, Pterocarpus santalinus                                                 | undetermined activity                                  | J Am Chem Soc 1940:787                                                                                                                                             | -0.99 | 0.21  | -1.84                  | -0.27 | -0.72   |
| 0201092     | 4-METHOXYDALBERGIONE                     | 100122-23 | B11      | sample         | 4649-86-0  | C26H40O3   | 254.28818 |                                           | Dalbergia retusa and D. nigra                                                      | undetermined activity                                  | Phytochemistry 17: 1395 (1978); Tetrahedron 21: 2683 (1965)                                                                                                        | -0.70 | 1.16  | -1.04                  | -0.44 | -0.26   |
|             | 0.04% JAK2nhib                           | 100122-23 | B12      | 0.04% jak2nhib |            |            |           |                                           |                                                                                    |                                                        |                                                                                                                                                                    | -2.36 | -1.46 | -0.08                  | -1.64 | -1.38   |
|             | 0.04% DMSO                               | 100122-23 | C01      | 0.04% dmso     |            |            |           |                                           |                                                                                    |                                                        |                                                                                                                                                                    | -0.62 | 0.21  | -0.76                  | -0.40 | -0.11   |
| 00231084    | UMBELLIFERONE                            | 100122-23 | C02      | sample         | 93-35-6    | C9H6O3     | 162.14637 | antifungal, phytoalexin                   | Angelica, Artemisia, Coronilla, Ferula and Ruta spp                                | experimental                                           | Chem Pharm Bull 19:640 (1971); Phytochemistry 14:1083 (1975)                                                                                                       | 0.22  | -1.14 | -1.77                  | -1.41 | -1.03   |
| 00200441    | XANTHOXYLIN                              | 100122-23 | C03      | sample         | 90-24-4    | C10H12O4   | 196.20474 |                                           | Xanthoxylum spp, Artemisia brevifolia                                              | undetermined activity                                  |                                                                                                                                                                    | 1.36  | -1.01 | -0.38                  | 0.37  | 0.09    |
| 00201138    | DEQUELIN(-)                              | 100122-23 | C04      | sample         | 522-17-8   | C23H22O6   | 394.42819 | antineoplastic, antiviral, insecticide    | Tephrosia & Dennis spp                                                             | experimental                                           | J Am Chem Soc 56: 2415 (1934); J Org Chem 44: 2580 (1979); Applied Microbiol 18: 660 (1969); Proc Natl Acad Sci 95: 3380 (1998); J Natl Cancer Inst 96: 291 (2003) | 5.10  | 4.22  | 4.74                   | 6.25  | 5.08    |
| 00201315    | 7,8-DIHYDROXYFLAVONE                     | 100122-23 | C05      | sample         | 38183-03-8 | C15H10O4   | 254.24455 | vascular protectant, anthelmormthagic     | Godmania aescuifolia                                                               | experimental                                           | J Chem Soc 1939: 856, 958, 1956:4170                                                                                                                               | -0.78 | -1.53 | -2.26                  | -2.34 | -1.73   |
| 00201466    | MANDELIC ACID, METHYL ESTER              | 100122-23 | C06      | sample         |            | C9H10O3    | 166.17825 |                                           | free acid found in Poria spp.                                                      | undetermined activity                                  |                                                                                                                                                                    | 2.51  | -0.14 | -0.82                  | -1.63 | -0.02   |
| 00201186    | CITRININ                                 | 100122-23 | C07      | sample         | 518-75-2   | C19H14O5   | 250.25333 | antibacterial                             | Penicillium citrinum                                                               | experimental                                           | J Chem Soc 1963: 3777                                                                                                                                              | -1.17 | -0.46 | -0.38                  | 0.46  | 1.52    |
| 00210477    | ACTINONIN                                | 100122-23 | C08      | sample         | 13434-13-4 | C19H38NO5  | 385.5079  | antibacterial                             | Streptomyces spp                                                                   | undetermined activity                                  | Nature 195:701 (1962)                                                                                                                                              | -1.70 | -1.09 | -2.45                  | -2.02 | -1.54   |
| 00210567    | DIMETHYLCAFFEIC ACID                     | 100122-23 | C09      | sample         | 14737-99-9 | C11H12O4   | 208.21589 |                                           | Piper methysticum, Veronica virginica                                              | undetermined activity                                  |                                                                                                                                                                    | 0.28  | 1.11  | -0.12                  | -0.76 | 0.12    |
| 00210697    | EUPHOL                                   | 100122-23 | C10      | sample         | 514-47-6   | C30H50O    | 426.7324  |                                           | Euphorbia spp                                                                      | undetermined activity                                  | J Chem Soc 1944:249; 1958:179                                                                                                                                      | -8.68 | -2.36 | 0.85                   | -0.46 | -2.66   |
| 00201515    | THEAEALAVIN DIALGALLATE                  | 100122-23 | C11      | sample         | 304623-5-2 | C11        | 439.12020 |                                           | pigment in black tea                                                               | undetermined activity                                  |                                                                                                                                                                    | 1.79  | 0.96  | -0.03                  | 1.44  | 0.46    |
|             | 0.11% JAK2nhib                           | 100122-23 | C12      | 0.11% jak2nhib |            |            |           |                                           |                                                                                    |                                                        |                                                                                                                                                                    | -4.20 | -0.88 | -4.20                  | -2.54 | -2.96   |
|             | 0.11% DMSO                               | 100122-23 | D01      | 0.11% dmso     |            |            |           |                                           |                                                                                    |                                                        |                                                                                                                                                                    | -1.75 | -1.56 | -0.09                  | -1.43 | -1.21   |
| 01500531    | GARDENIN B                               | 100122-23 | D02      | sample         | 2798-20-1  | C19H18O7   | 358.35511 |                                           | Gardenia lucida; Brickellia, Citrus and Merthia spp                                | undetermined activity                                  | Tetrahedron 21:1441, 3741 (1965); Chem Pharm Bull 28:708, 717 (1980); Phytochemistry 23:2972 (1984)                                                                | -0.37 | -0.91 | 3.10                   | 1.47  | 0.82    |
| 00107022    | beta-SITOSTEROL                          | 100122-23 | D03      | sample         | 83-46-5    | C29H50O    | 414.72125 |                                           | widespread in plants                                                               | undetermined activity                                  | J Am Chem Soc 48: 2987 (1926)                                                                                                                                      | 0.48  | -2.23 | -0.06                  | 0.63  | -0.29   |
| 00102007    | FORMONONETIN                             | 100122-23 | D04      | sample         | 485-72-3   | C16H12O4   | 268.27164 | phytoestrogen                             | soyabean and clover species                                                        | experimental                                           | J Chem Soc 1933: 274                                                                                                                                               | 0.31  | -0.61 | 0.42                   | 0.42  | 0.44    |
| 00200545    | CHRYSOPHANOL                             | 100122-23 | D05      | sample         | 481-74-3   | C19H14O4   | 285.31004 |                                           | Curatella and Rumez spp                                                            | undetermined activity                                  | Phytochemistry 11: 2122 (1972)                                                                                                                                     | 0.45  | 1.74  | -0.87                  | -1.13 | -0.14   |
| 00200565    | 5,7-DIHYDROXYISOFLAVONE                  | 100122-23 | D06      | sample         | 404-00-2   | C18H14O4   | 254.24455 |                                           | Arachis hypogaea & Dennis spp                                                      | undetermined activity                                  | J Chem Soc 1953:1852; CA 104:165440 (1966)                                                                                                                         | 0.78  | -0.02 | -0.20                  | 0.33  | 0.22    |
| 01500294    | CINCEOLE                                 | 100122-23 | D07      | sample         | 470-82-6   | C16H18O    | 154.25436 | antihelmintic, antiseptic, expectorant    | eucalyptus and lavender oils                                                       | experimental                                           |                                                                                                                                                                    | 0.00  | 0.23  | 0.11                   | -0.55 | -0.11   |
| 01501210    | HUMULENE (alpha)                         | 100122-23 | D08      | sample         | 5752-98-6  | C15H24     | 204.35853 |                                           | and clove oils                                                                     | undetermined activity                                  | JACS 99: 3864 (1977); J Chem Soc 1980: 311                                                                                                                         | -0.02 | -0.53 | -0.22                  | -0.13 | -0.28   |
| 01504076    | YOHIMBIC ACID HYDRATE                    | 100122-23 | D09      | sample         | 522-87-2   | C20H28NO2  | 358.44122 |                                           | derivative, yohimbic acid                                                          | undetermined activity                                  | J Chem Soc 123: 3003 (1923)                                                                                                                                        | -0.24 | 0.06  | -0.32                  | 1.00  | 0.29    |
| 00202175    | 12a-HYDROXY-5-DEOXYDEHYDROMUNDUSERONE    | 100122-23 | D10      | sample         |            | C18H18O6   | 342.35171 |                                           | derivative                                                                         | undetermined activity                                  |                                                                                                                                                                    | 0.41  | 0.51  | -0.75                  | -0.77 | -0.15   |
| 00212061    | PHYRROCAEUCHIC ACID                      | 100122-23 | D11      | sample         | 303-38-8   | C7H8O4     | 154.12347 | antioxidant                               | Erythraea centaurium, Gentiana lutea                                               | experimental                                           |                                                                                                                                                                    | 0.23  | 1.35  | -0.09                  | 0.20  | 0.42    |
|             | 0.11% JAK2nhib                           | 100122-23 | D12      | 0.11% jak2nhib |            |            |           |                                           |                                                                                    |                                                        |                                                                                                                                                                    | -0.13 | -0.83 | -0.55                  | -0.68 | -0.37   |
|             | 0.11% JAK2nhib                           | 100122-23 | E01      | 0.11% jak2nhib |            |            |           |                                           |                                                                                    |                                                        |                                                                                                                                                                    | -4.09 | -4.72 | -3.69                  | -2.77 | -3.82   |
| 00212097    | ONONETIN                                 | 100122-23 | E02      | sample         | 487-49-0   | C19H14O4   | 258.27643 |                                           | Trifolium subterraneum                                                             | undetermined activity                                  | Monatsh Chem 63: 201 (1933); Aust J Chem 19: 1755 (1966)                                                                                                           | 0.92  | -1.22 | 0.32                   | -1.02 | -0.25   |
| 00211539    | ARABITOL(D)                              | 100122-23 | E03      | sample         | 488-82-4   | C5H12O5    | 152.14839 |                                           | Lecanora sorrida & other lichen & fungi                                            | undetermined activity                                  |                                                                                                                                                                    | -0.01 | -1.37 | 0.57                   | -0.27 | -0.27   |
| 00211249    | 7,4-DIMETHOXYISOFLAVONE                  | 100122-23 | E04      | sample         |            | C17H14O4   | 262.28873 |                                           | Dalbergia violacea, Pterodon apparicio                                             | undetermined activity                                  |                                                                                                                                                                    | 1.33  | 0.80  | 2.49                   | 2.70  | 1.83    |
| 00211012    | IRINGOLIN HEXACAEGATE                    | 100122-23 | E05      | sample         |            | C27H22O14  | 570.40799 |                                           | semisynthetic                                                                      | undetermined activity                                  |                                                                                                                                                                    | 0.03  | 0.69  | 1.81                   | -0.64 | 0.47    |
| 00211066    | 2-METHOXYRESORCINOL                      | 100122-23 | E06      | sample         | 29267-67-2 | C7H8O3     | 140.14001 |                                           | Pterophorum africanum                                                              | undetermined activity                                  | Phytochemistry 29:283 (1990)                                                                                                                                       | -0.50 | -0.29 | 0.37                   | -0.62 | 0.24    |
| 00300048    | KOBUSONE                                 | 100122-23 | E07      | sample         | 24173-71-5 | C14H22O2   | 222.33024 |                                           | Cyperus rotundus, Sindora sumatrana                                                | undetermined activity                                  | J Chem Soc 1957: 2988; Chem Pharm Bull 17: 1390 (1969); 42: 138 (1994); Helv Chim Acta 66: 1843 (1983)                                                             | 0.04  | 0.06  | 2.99                   | 1.66  | 1.19    |
| 00204645    | RETUSIN-7-METHYLETHER                    | 100122-23 | E08      | sample         |            | C17H14O5   | 298.29813 |                                           | derivative Dalbergia spp                                                           | undetermined activity                                  |                                                                                                                                                                    | -0.27 | -0.05 | 0.89                   | 1.09  | 0.42    |
| 00204073    | ROBUSTIC ACID                            | 100122-23 | E09      | sample         | 5307-59-9  | C22H20O6   | 380.4011  |                                           | Dennis robusta                                                                     | undetermined activity                                  | J Chem Soc 1969:365                                                                                                                                                | -0.87 | 0.10  | -0.46                  | 0.42  | -0.20   |
| 00204914    | PSEUDO-ANISATIN                          | 100122-23 | E10      | sample         | 31090-37-6 | C19H22O6   | 298.3389  | GABA antagonist                           | Illicium anisatum                                                                  | experimental                                           | J Am Chem Soc 74: 3211 (1952)                                                                                                                                      | -0.24 | 2.99  | 2.05                   | -0.23 | 1.14    |
| 00204956    | 4-METHOXYFLAVONE                         | 100122-23 | E11      | sample         | 4145-74-2  | C19H12O3   | 252.27224 |                                           | Sapindus saponaria.                                                                | undetermined activity                                  |                                                                                                                                                                    | 1.79  | 0.12  | -0.19                  | -0.12 | 0.46    |
|             | 0.11% DMSO                               | 100122-23 | E12      | 0.11% dmso     |            |            |           |                                           |                                                                                    |                                                        |                                                                                                                                                                    | -0.59 | 0.73  | -0.56                  | 3.93  | 1.13    |
|             | 0.11% JAK2nhib                           | 100122-23 | F01      | 0.11% jak2nhib |            |            |           |                                           |                                                                                    |                                                        |                                                                                                                                                                    | -1.46 | -2.84 | -2.30                  | -3.98 | -2.67   |
| 00204844    | HAEMATOPHYLLIN PENTAACETATE              | 100122-23 | F02      | sample         |            | C28H40A12  | 528.47398 |                                           | derivative                                                                         | undetermined activity                                  | Bul Soc Chim Fr 1972: 3292                                                                                                                                         | -0.72 | -0.95 | 0.26                   | -0.95 | -0.57   |
| 01500525    | DIHYDROFANSINONE                         | 100122-23 | F03      | sample         | C19H14O3   | 278.31048  |           | Salvia millitoriza                        | undetermined activity                                                              | Acta Chim Sinica:199 (1978); J Org Chem 55:3537 (1990) | -0.20                                                                                                                                                              | -3.08 | -2.41 | -2.01                  | -3.19 |         |
| 00204862    | KUHLMANNIN                               | 100122-23 | F04      | sample         |            | C17H14O5   | 298.29813 |                                           | Manchaurium spp                                                                    | undetermined activity                                  | Phytochemistry 17: 1383 (1978)                                                                                                                                     | 0.00  | -0.66 | 2.85                   | 1.98  | 1.04    |
| 00203010    | beta-TOXICAROL                           | 100122-23 | F05      | sample         | 82-11-1    | C23H22O7   | 410.42759 |                                           | Dennis species & isomeration of alpha-toxicarol                                    | undetermined activity                                  | J Chem Soc 1938: 513,734; 1939: 812                                                                                                                                | 3.02  | 3.31  | 4.29                   | 2.18  | 3.20    |
| 00100556    | 6-HYDROXYHYDROGENSOLIC ACID METHYL ESTER | 100122-23 | F06      | sample         |            | C27H34O8   | 486.55723 |                                           | Galaxaea spp                                                                       | undetermined activity                                  |                                                                                                                                                                    | -1.07 | -0.36 | -0.96                  | -0.96 | -1.01   |
| 01504029    | LIGUSTILIDE                              | 100122-23 | F07      | sample         | 4431-01-0  | C12H14O2   | 190.24418 | antispasmodic, smooth muscle relaxant     | Ligusticum and Angelica spp                                                        | experimental                                           | Phytochemistry 23: 2033 (1984); J Nat Prod 58: 1047 (1995)                                                                                                         | 0.18  | 0.02  | 0.20                   | 1.84  | 0.56    |
| 00300532    | ANDROGRAPHOLIDE                          | 100122-23 | F08      | sample         | 5508-58-7  | C20H30O5   | 350.4591  |                                           | Adrographis peniculata                                                             | undetermined activity                                  | Indian J Chem 6: 252 (1968)                                                                                                                                        | 0.61  | 1.05  | 2.95                   | 2.14  | 1.69    |
| 00100576    | TRIDESACETOXYKHOVINORIN                  | 100122-23 | F09      | sample         |            | C28H36O7   | 460.57262 |                                           | Khaya spp                                                                          | undetermined activity                                  |                                                                                                                                                                    | -2.05 | 0.69  | -0.01                  | -0.02 | -0.35   |
| 00104045    | DIHYDROFISINOLIDE                        | 100122-23 | F10      | sample         |            | C29H38O8   | 514.62141 |                                           | derivative of fisalinolide (00100031)                                              | undetermined activity                                  |                                                                                                                                                                    | -0.08 | -0.06 | 2.53                   | -0.72 | 0.42    |
| 00211224    | alpha-TOXICAROL                          | 100122-23 | F11      | sample         | 82-09-7    | C23H22O7   | 410.42759 |                                           | Dennis spp                                                                         | undetermined activity                                  | J Chem Soc 1938: 513                                                                                                                                               | 3.40  | 4.07  | 3.60                   | 3.92  | 3.75    |
|             | 0.04% DMSO                               | 100122-23 | F12      | 0.04% dmso     |            |            |           |                                           |                                                                                    |                                                        |                                                                                                                                                                    | 1.24  | 0.73  | 0.06                   | 0.70  | 0.30    |
|             | 0.04% JAK2nhib                           | 100122-23 | G01      | 0.04% jak2nhib |            |            |           |                                           |                                                                                    |                                                        |                                                                                                                                                                    | -0.42 | -3.27 | -2.21                  | -1.31 | -1.80   |
| 00300459    | HYDROXY ISOABOAGBOIC ACID                | 100122-23 | G02      | sample         |            | C40H46O9   | 670.80722 |                                           | derivative                                                                         | undetermined activity                                  | J Chem Soc 1966:772; Magn Reson Chem 31: 340 (1993)                                                                                                                | -0.58 | -2.18 | 0.20                   | -0.25 | -1.38   |
| 00204028    | 3,4-DIMETHOXYDALBERGIONE                 | 100122-23 | G03      | sample         | 41043-20-3 | C17H14O4   | 262.28873 |                                           | Dalbergia spp, Macheerium spp                                                      | undetermined activity                                  | Tetrahedron 21: 2697 (1965)                                                                                                                                        | 0.30  | 1.59  | 0.64                   | 0.69  | 0.85    |
| 01500567    | ACETOQUINOLIN                            | 100122-23 | G04      | sample         | 1435-55-8  | C20H28NO2  | 326.4442  | antiarrhythmic, antimalarial              | Cinchona bark                                                                      | INN                                                    |                                                                                                                                                                    | -0.50 | -1.00 | 0.89                   | 1.16  | 0.37    |
| 01500639    | OTOPAMINE HYDROCHLORIDE                  | 100122-23 | G05      | sample         | 104-14-3   | C8H12ClNO2 | 189.84334 | adrenergic agonist                        | salivary glands of Octopus vulgaris; also Capsicum frutescens & Cyperus spp, ND-50 | INN                                                    |                                                                                                                                                                    | 0.43  | -0.38 | 0.07                   | 0.17  | 0.07    |
| 00270067    | STIGMATA-4,22-DIEN-3-ONE                 | 100122-23 | G06      | sample         | 20817-72-9 | C26H40     | 410.69337 |                                           | plant constituent                                                                  | undetermined activity                                  | J Chem Soc 1942:391; Phytochemistry 22:2087 (1983)                                                                                                                 | -2.96 | -0.41 | 1.56                   | 0.75  | -0.26   |
| 01500843    | LATHOSTEROL                              | 100122-23 | G07      | sample         |            | C27H46O    | 386.66707 |                                           | Austeria rubens                                                                    | undetermined activity                                  | J Biol Chem 248: 6697 (1973)                                                                                                                                       | -0.57 | -0.31 | 0.86                   | 1.48  | -0.96   |
| 01500880    | TRIGONELLINE                             | 100122-23 | G08      | sample         | 535-83-1   | C7H12NO2   | 137.13934 | antihyperglycemic                         | Trigonella foenagræum and in coffee beans                                          | experimental                                           | J Org Chem 26: 1318 (1961)                                                                                                                                         | 0.75  | 0.81  | -0.73                  | 4.21  | 1.26    |
| 01500659    | ARTEMISININ                              | 100122-23 | G09      | sample         | 481-05-0   | C15H22O5   | 276.3364  | antihelmintic                             | Artemisia spp                                                                      | experimental                                           | J Chem Soc 1963: 5235                                                                                                                                              | 0.16  | 0.06  | -0.16                  | -0.76 | -0.16   |

| Compound ID | MoName                                            | plate     | position | Content        | cas#                              | Formula      | MoWt      | Bioactivity                                                     | Source                                           | Status                | Reference                                                                                                             | rep1  | rep2  | Screen Score (z-score) |       |       | rep4  | Average |  |
|-------------|---------------------------------------------------|-----------|----------|----------------|-----------------------------------|--------------|-----------|-----------------------------------------------------------------|--------------------------------------------------|-----------------------|-----------------------------------------------------------------------------------------------------------------------|-------|-------|------------------------|-------|-------|-------|---------|--|
| 00102005    | 3alpha-ACETOXYDIHYDRODEOXYGEDUNIN                 | 100122-24 | C03      | sample         |                                   | C30H40O7     | 512.6491  |                                                                 | Melissae spp                                     | undetermined activity |                                                                                                                       | -0.79 | -1.89 | -0.39                  | -1.97 | -1.26 |       |         |  |
| 00240927    | CAPERATIC ACID                                    | 100122-24 | C04      | sample         | 29227-64-3                        | C21H38O7     | 402.53281 | antibacterial (tuberculostatic)                                 | lichens: Parnelia, Mycoblastus, Nephromopsis spp | undetermined activity | J Nat Prod 29:43 (1966); J Pharm Sci, 56:1611 (1967); 57:1804 (1968); Acta Chem Scand, 29:899 (1975)                  | -0.57 | -1.60 | -0.54                  | 1.75  | -0.24 |       |         |  |
| 00307033    | 3-HYDROXY-4-(SUCCIN-2-YL)-CARYOLANE delta-LACTONE | 100122-24 | C05      | sample         |                                   | C19H28O4     | 320.43261 |                                                                 | derivative of caryophyllene                      | undetermined activity |                                                                                                                       | -1.33 | -1.10 | -1.12                  | -0.20 | -1.06 |       |         |  |
| 00105063    | OXONTINE                                          | 100122-24 | C06      | sample         |                                   | C39H43NO12   | 645.71016 |                                                                 | derivative of acorniline                         | undetermined activity | J Am Chem Soc 76: 4048 (1954)                                                                                         | 0.80  | 0.53  | -0.25                  | -1.14 | -0.02 |       |         |  |
| 00240942    | ARITHONIC ACID                                    | 100122-24 | C07      | sample         | 25556-24-5                        | C28H36O9     | 528.60487 |                                                                 | Z Naturforsch B 26: 49 (1970)                    | undetermined activity |                                                                                                                       | 0.58  | 0.16  | 0.36                   | -0.76 | 0.09  |       |         |  |
| 00310002    | ADONITOL                                          | 100122-24 | C08      | sample         | 488-81-3                          | C5H12O5      | 152.14839 |                                                                 | Adonis spp                                       | undetermined activity | Pharm Acta Helv 23: 153 (1948); JACS 104: 1109 (1982); J Chem Soc 1983: 1553                                          | 1.66  | -0.39 | -1.21                  | 2.05  | 0.53  |       |         |  |
| 00240736    | 2-METHOXYXANTHONE                                 | 100122-24 | C09      | sample         | 1214-20-6                         | C14H10O3     | 226.234   |                                                                 | Mammea and Keimleyera spp.                       | undetermined activity | Phytochemistry 9: 447, 2537 (1970)                                                                                    | -0.33 | 0.31  | -0.55                  | -0.51 | -0.27 |       |         |  |
| 01500716    | ALANYL-D-LEUCINE                                  | 100122-24 | C10      | sample         |                                   | C9H11N2O3    | 202.25541 |                                                                 | synthetic                                        | undetermined activity |                                                                                                                       | -0.01 | 1.58  | 0.16                   | -0.30 | 0.36  |       |         |  |
| 01500865    | HARMALOL HYDROCHLORIDE                            | 100122-24 | C11      | sample         | 6028-07-2                         | C12H13ClN2O  | 236.70321 | antihelmintic, narcotic agent                                   | Peganium harmala                                 | experimental          | Biochem J 77: 727 (1953); Phytochemistry 19: 1573 (1980)                                                              | 0.83  | -0.01 | -1.08                  | -0.90 | -0.28 | -0.13 |         |  |
| 01116       | JAK2inhb                                          | 100122-24 | C12      | 0.11% jak2inhb |                                   |              |           |                                                                 |                                                  |                       |                                                                                                                       | -2.67 | -3.22 | -3.39                  | -2.39 | -2.88 |       |         |  |
| 01116       | DMSO                                              | 100122-24 | D01      | 0.11% dmso     |                                   |              |           |                                                                 |                                                  |                       |                                                                                                                       | -1.10 | -2.02 | -1.76                  | -0.90 | -1.44 |       |         |  |
| 01500870    | MYOSINE                                           | 100122-24 | D02      | sample         | 532-12-7                          | C9H10N2      | 146.19345 | mitogen                                                         | tobacco, nuts                                    | undetermined activity | Tetrahedron Letters, 1967: 5185                                                                                       | 0.00  | -0.02 | 0.19                   | 2.14  | 0.58  |       |         |  |
| 01500996    | GLAFENINE                                         | 100122-24 | D03      | sample         | 3820-67-5                         | C18H17ClNO2  | 372.81134 | analgesic                                                       | synthetic                                        | INN, JAN              |                                                                                                                       | 0.91  | 0.12  | 0.57                   | 0.00  | 0.26  |       |         |  |
| 01501116    | METHYLDOLIN NAPHTHALENESULFONATE                  | 100122-24 | D04      | sample         | 524-81-2                          | C28H29NO2S   | 464.68431 | H1 antihistamine                                                | INN, BAN, JAN                                    | experimental          |                                                                                                                       | -0.77 | 0.39  | -0.08                  | -1.89 | -0.59 |       |         |  |
| 01501113    | PERUVOSIDE                                        | 100122-24 | D05      | sample         | 1182-67-2                         | C38H44O9     | 548.67978 | cardiotonic                                                     | Thvetia peruviana                                | experimental          | Helv Chim Acta 35:673, 703, 1073; 36:370 (1952); 45:907 (1962); 46:2886 (1963)                                        | -0.69 | -0.62 | -2.83                  | 2.57  | -1.66 |       |         |  |
| 01500909    | PROTACETERATINE A                                 | 100122-24 | D06      | sample         | 143-57-7                          | C41H63NO14   | 793.95756 | antihypertensive, emetic; LD50 (rat) 0.5 mg/kg po               | Veratrum album, V viride, V nigrum               | INN                   | J Biol Chem 149:271 (1943); JACS 82:2242, 2252 (1960); Planta Med 10:138 (1982)                                       | 1.13  | 0.63  | 1.04                   | -0.42 | 0.59  |       |         |  |
| 01501125    | 3-AMINOPROPANESULFONIC ACID                       | 100122-24 | D07      | sample         | 3687-18-1                         | C3H9NO3S     | 139.17408 | antibacterial, GABA agonist                                     | synthetic                                        | experimental          | Br J Pharmacol 59:373 (1977); Neuropharmacology 17:13 (1978)                                                          | -0.15 | 0.73  | 1.21                   | 0.17  | 0.49  |       |         |  |
| 01501143    | SULFAPHENAZOLE                                    | 100122-24 | D08      | sample         | 526-08-9                          | C19H14N4O2S  | 314.36843 | antibacterial                                                   | synthetic                                        | INN, BAN, JAN         |                                                                                                                       | 0.81  | 0.11  | 0.62                   | -0.57 | 0.24  |       |         |  |
| 01501157    | SULBIXZONE                                        | 100122-24 | D09      | sample         | 27470-51-5                        | C24H26N2O6   | 438.48462 | analgesic, antipyretic, antiinflammatory                        | synthetic                                        | INN, BAN, JAN         |                                                                                                                       | 0.91  | 0.11  | 0.82                   | 0.71  | 0.64  |       |         |  |
| 01501172    | AZOBENZENE                                        | 100122-24 | D10      | sample         | 103-33-3                          | C12H10N2     | 162.2289  | azaridine, peripheral vasodilator                               | synthetic                                        | INN, BAN, JAN         |                                                                                                                       | 3.39  | -0.08 | 0.49                   | 0.11  | 1.13  |       |         |  |
| 01501174    | TODRALAZINE HYDROCHLORIDE                         | 100122-24 | D11      | sample         | 14679-73-3                        | C11H13ClN4O2 | 268.70486 | antihypertensive, peripheral vasodilator                        | synthetic; CEPH, BT-621                          | INN, BAN, JAN         |                                                                                                                       | 0.56  | 0.17  | 0.12                   | 2.79  | 0.91  |       |         |  |
| 01116       | JAK2inhb                                          | 100122-24 | D12      | 0.11% jak2inhb |                                   |              |           |                                                                 |                                                  |                       |                                                                                                                       | -4.08 | 0.39  | -3.16                  | -2.90 | -2.44 |       |         |  |
| 01501183    | ESTRADIOL, METHYL ETHER                           | 100122-24 | E02      | 0.11% jak2inhb |                                   |              |           |                                                                 | semisynthetic                                    | experimental          | JACS 100: 6218 (1978)                                                                                                 | -3.96 | -2.55 | -3.89                  | -3.47 | -3.46 |       |         |  |
| 01501198    | TOLFENAMIC ACID                                   | 100122-24 | E03      | sample         | 1035-77-4                         | C14H12ClNO2  | 286.41787 | estrogen                                                        | synthetic                                        | INN, BAN, JAN         |                                                                                                                       | -1.40 | 0.86  | -1.21                  | -0.37 | -0.47 |       |         |  |
| 01501192    | ESTRADIOL-3-SULFATE, SODIUM SALT                  | 100122-24 | E04      | sample         | 13710-19-5                        | C14H12ClNO2  | 286.41787 | analgesic, antipyretic, antiinflammatory                        | synthetic                                        | INN, BAN, JAN         |                                                                                                                       | 0.40  | 0.78  | 1.92                   | 0.48  | 0.90  |       |         |  |
| 01502070    | 6,7-DICHLORO-2-QUINOLINOL-3-SULFATE, SODIUM SALT  | 100122-24 | E05      | sample         |                                   | C18H23NaO5S  | 374.43481 | estrogen                                                        | semisynthetic                                    | experimental          |                                                                                                                       | -0.41 | -0.92 | -0.59                  | 0.46  | 0.63  |       |         |  |
| 01502074    | QUINOXALINECARBOXYLIC ACID                        | 100122-24 | E06      | sample         |                                   | C9H4Cl2N2O3  | 259.04983 | NMDA and kainate receptor antagonist                            | synthetic                                        | experimental          | Neurosci Lett 91: 194 (1988)                                                                                          | 0.20  | 1.10  | -0.25                  | 4.15  | 1.30  |       |         |  |
| 01502077    | 4-NAPHTHALIMIDOBUTYRIC ACID                       | 100122-24 | E07      | sample         | 56368-58-2                        | C16H11NO4    | 283.28631 | aldose reductase inhibitor                                      | synthetic                                        | experimental          |                                                                                                                       | 0.60  | 0.83  | 1.26                   | 1.22  | 0.98  |       |         |  |
| 01502073    | IMIDAZOL-4-YLACETIC ACID SODIUM SALT              | 100122-24 | E08      | sample         |                                   | C5H5N2NaO2   | 148.0976  | GABA antagonist                                                 | synthetic                                        | experimental          | Br J Pharmacol 109: 200 (1993); Gen Pharmacol 31:503 (1998)                                                           | 2.77  | 0.02  | 0.82                   | 0.17  | 0.95  |       |         |  |
| 01502083    | N-(9-FLUORENYLMETHOXY)CARBONYL-L-LEUCINE          | 100122-24 | E09      | sample         | 35661-60-0                        | C21H23NO4    | 353.42176 | antiinflammatory                                                | synthetic; NPC-15199                             | experimental          | PNAS 88:355 (1991); J Pharmacol Exp Ther 266:468 (1993)                                                               | 0.58  | 0.26  | -0.27                  | 0.11  | 0.17  |       |         |  |
| 01502095    | alpha-CYANO-3-HYDROXYCINNAMIC ACID                | 100122-24 | E09      | sample         |                                   | C10H7NO3     | 189.17219 | inhibit mitochondrial pyruvate transport                        | synthetic                                        | experimental          |                                                                                                                       | -0.02 | -0.09 | 0.32                   | 0.52  | 0.18  |       |         |  |
| 01502092    | 5-FLUORINDOLE-2-CARBOXYLIC ACID                   | 100122-24 | E10      | sample         | 399-76-8                          | C9H6FNO2     | 179.15207 | NMDA receptor antagonist (gly)                                  | synthetic                                        | experimental          |                                                                                                                       | -0.64 | 0.46  | -0.60                  | -0.07 | -0.21 |       |         |  |
| 01502114    | p-FLUOROPHENYLALANINE                             | 100122-24 | E11      | sample         | 51-65-0                           | C9H10FNO2    | 183.16395 | alpha amino acid antagonist, protein synthesis inhibitor        | synthetic                                        | experimental          | J Biol Chem 269: 24637 (1994); Biochemistry 35: 6969 (1996); Eur J Cell Biol 23: 312 (1981)                           | 0.20  | 0.21  | 0.31                   | 1.43  | 0.54  |       |         |  |
| 01502103    | ANTHRACENOL                                       | 100122-24 | F02      | 0.11% dmso     |                                   |              |           |                                                                 | synthetic                                        | experimental          |                                                                                                                       | -0.43 | 0.51  | -0.96                  | 2.48  | 0.40  |       |         |  |
| 01502130    | AMINOCYCLOPROPANECARBOXYLIC ACID                  | 100122-24 | F03      | 0.11% jak2inhb |                                   |              |           |                                                                 | synthetic; ACPC                                  | experimental          |                                                                                                                       | -3.64 | -4.73 | -2.88                  | -1.60 | -3.21 |       |         |  |
| 01502128    | CYCLOLEUCINE                                      | 100122-24 | F04      | sample         | 84-65-1                           | C14H28O2     | 208.21866 | inhibitor                                                       | synthetic                                        | experimental          |                                                                                                                       | -0.02 | -0.88 | -1.20                  | -0.72 | -0.73 |       |         |  |
| 01502129    | ISOGUANIC ACID                                    | 100122-24 | F05      | sample         | 68781-13-5                        | C4H7NO2      | 101.10589 | NMDA partial agonist (gly)                                      | synthetic                                        | experimental          |                                                                                                                       | 0.76  | -0.36 | -0.18                  | -0.48 | -0.07 |       |         |  |
| 01502162    | CHLOROPHOLINE                                     | 100122-24 | F06      | sample         | 52-62-8                           | C9H11NO2     | 129.16007 | NMDA receptor antagonist (gly)                                  | synthetic                                        | experimental          |                                                                                                                       | 1.15  | 2.20  | 0.19                   | -0.46 | 0.77  |       |         |  |
| 01502229    | ISOGUANIC ACID                                    | 100122-24 | F07      | sample         | 64603-90-3                        | C9H11NO2     | 163.0051  | GABA agonist                                                    | synthetic                                        | experimental          |                                                                                                                       | 1.18  | 0.42  | 0.37                   | -2.09 | 0.37  |       |         |  |
| 01502229    | ABETIC ACID                                       | 100122-24 | F07      | sample         | 7424-00-2(a); 14173-38-0(b)       | C9H10ClNO2   | 199.63655 | irreversible inhibitor of tyrosinase                            | synthetic                                        | experimental          |                                                                                                                       | 0.51  | 0.78  | -0.53                  | 0.78  | 0.06  |       |         |  |
| 01502209    | PHENETHYL CAFFEATE (CAPE)                         | 100122-24 | F08      | sample         | 514-10-3                          | C20H30O2     | 302.4609  | common diene acid in conifers                                   | undetermined activity                            | experimental          | PNAS 83:9090 (1996)                                                                                                   | 0.31  | 0.36  | 1.12                   | 0.69  | 0.62  |       |         |  |
| 01502207    | L-LEUCYL-L-ALANINE                                | 100122-24 | F09      | sample         | 104594-70-9                       | C17H18O4     | 284.31467 | antineoplastic, antiinflammatory, immunomodulator, NFKB blocker | synthetic                                        | experimental          |                                                                                                                       | 0.42  | 0.21  | 0.07                   | 0.93  | 0.82  |       |         |  |
| 01503254    | BALPHA-METHYLPREDNISOLONE ACETATE                 | 100122-24 | F10      | sample         | 7296-94-2                         | C21H28O5     | 360.45221 | glucocorticoid                                                  | semisynthetic                                    | experimental          |                                                                                                                       | -0.16 | 0.37  | 0.29                   | 1.22  | 0.43  |       |         |  |
| 01503127    | DEQUALINUM CHLORIDE                               | 100122-24 | F11      | sample         | 522-51-0, 6707-58-0 (dequalinium) | C24H32O6     | 416.51904 | glucocorticoid                                                  | synthetic; BAQD-10                               | INN, BAN, JAN         |                                                                                                                       | 1.00  | 0.48  | -0.23                  | 1.68  | 0.73  |       |         |  |
| 01503077    | PRIDINOL METHANESULFONATE                         | 100122-24 | F12      | 0.04% dmso     |                                   |              |           |                                                                 | synthetic; C-238                                 | INN, JAN              |                                                                                                                       | -0.39 | 0.42  | -0.46                  | -0.41 | -0.31 |       |         |  |
| 01503043    | BUCLADESINE                                       | 100122-24 | G01      | 0.04% jak2inhb |                                   |              |           |                                                                 | synthetic                                        | INN, JAN              |                                                                                                                       | -2.64 | -2.33 | -2.63                  | -2.13 | -2.13 |       |         |  |
| 01503259    | MORIN                                             | 100122-24 | G02      | sample         | 511-45-5                          | C21H29NO4S   | 391.53358 | anticholinergic                                                 | synthetic                                        | INN, JAN              |                                                                                                                       | -1.21 | -1.05 | -2.05                  | -1.53 | -1.46 |       |         |  |
| 01503391    | D-PHENYLALANINE                                   | 100122-24 | G03      | sample         | 362-74-3                          | C18H24NSO8P  | 469.39448 | vasodilator                                                     | synthetic                                        | experimental          | J Chem Soc 67: 649 (1895)                                                                                             | -1.27 | 0.44  | -0.26                  | -0.55 | -0.41 |       |         |  |
| 01503403    | EXALAMIDE                                         | 100122-24 | G04      | sample         | 480-16-0                          | C19H17NO7    | 302.24275 | P450 and ATPase inhibitor                                       | Chlorophora tinctoria                            | INN                   |                                                                                                                       | 0.59  | 0.09  | 0.52                   | 0.00  | 0.00  |       |         |  |
| 01503297    | HEXAMETHONIUM BROMIDE                             | 100122-24 | G07      | sample         | 673-06-3                          | C9H11NO2     | 165.19302 | antidepressant                                                  | synthetic                                        | INN, BAN, JAN         |                                                                                                                       | 0.38  | 0.26  | -0.04                  | -0.43 | 0.05  |       |         |  |
| 01503425    | ZOPICLONE                                         | 100122-24 | G08      | sample         | 53370-90-4                        | C13H19NO2    | 232.30188 | antifungal                                                      | synthetic                                        | INN, BAN, JAN         |                                                                                                                       | -0.73 | 0.42  | 0.92                   | -0.25 | 0.45  |       |         |  |
| 01503637    | METIPRENALONE                                     | 100122-24 | G09      | sample         | 55-67-0, 60-26-4 (hexamethonium)  | C12H30BrN2   | 362.1943  | antihypertensive, ganglionic blocker                            | synthetic                                        | INN, BAN, JAN         |                                                                                                                       | -0.69 | -0.46 | 0.76                   | 0.23  | -0.04 |       |         |  |
| 01503637    | METIPRENALONE                                     | 100122-24 | G09      | sample         | 43200-80-2                        | C17H17ClNO3  | 388.81644 | hypnotic, sedative                                              | synthetic                                        | INN, BAN, JAN         |                                                                                                                       | 0.00  | -0.06 | 1.06                   | 0.42  | 0.35  |       |         |  |
| 01503641    | 1-PHENYL-3-ETHANOLAMINE HYDROCHLORIDE             | 100122-24 | G10      | sample         | 20229-30-5                        | C24H28NO4S2  | 472.62976 | 5HT1B2 receptor antagonist                                      | synthetic                                        | INN                   |                                                                                                                       | 2.04  | -1.44 | -0.39                  | 0.23  | 0.47  |       |         |  |
| 01503672    | SODIUM THIOGLYCOLATE                              | 100122-24 | G11      | sample         | 55-57-2                           | C18H17ClNO2  | 313.67134 | 5HT3 receptor agonist                                           | synthetic                                        | experimental          |                                                                                                                       | -0.18 | 0.08  | -0.07                  | -0.37 | -0.03 |       |         |  |
| 01503636    | 0.04% DMSO                                        | 100122-24 | G12      | 0.04% dmso     |                                   |              |           |                                                                 | synthetic                                        | experimental          |                                                                                                                       | 0.04  | -0.05 | -0.08                  | -0.56 | -0.16 |       |         |  |
| 01503636    | N-METHYL-D-ASPARTIC ACID (NMDA)                   | 100122-24 | H02      | 0.04% jak2inhb |                                   |              |           |                                                                 | synthetic                                        | experimental          |                                                                                                                       | -2.22 | -3.05 | -0.08                  | -3.76 | -2.28 |       |         |  |
| 01503051    | RETINYL ACETATE                                   | 100122-24 | H03      | sample         | 6384-92-5                         | C59H90O4     | 147.13178 | NMDA agonist                                                    | synthetic                                        | INN, BAN, JAN         |                                                                                                                       | -0.19 | 0.84  | -0.28                  | 0.99  | 0.09  |       |         |  |
| 01503936    | PERICIAZINE                                       | 100122-24 | H04      | sample         | 127-47-9                          | C22H32O2     | 328.49914 | vitamin precursor                                               | semisynthetic                                    | JAN                   |                                                                                                                       | 0.33  | 0.55  | -0.22                  | 3.04  | 0.92  |       |         |  |
| 01503906    | ANISOMYCIN                                        | 100122-24 | H05      | sample         | 2622-26-6                         | C21H23NO3S   | 365.50096 | antipsychotic                                                   | synthetic                                        | INN, BAN, JAN         |                                                                                                                       | -0.60 | -0.65 | -0.09                  | -0.79 | -0.53 |       |         |  |
| 01503947    | CACODYLIC ACID                                    | 100122-24 | H06      | sample         | 22862-76-6                        | C14H19NO4    | 265.31163 | antiprotoczoal, antifungal, protein synthesis inhibitor         | Streptomyces griseolus                           | experimental          | JACS 76:4063 (1954); Chem Pharm Bull 17:1405 (1969); Prog Neurobiology 16:155 (1981); Mol Cell Biochem 14:7352 (1994) | 0.79  | 2.19  | 2.55                   | 1.29  | 1.71  |       |         |  |
| 01503941    | THIOCTIC ACID                                     | 100122-24 | H07      | sample         | 75-89-5                           | C27H44O2     | 137.98840 | antiparasitic, dermatologic, herbicide                          | synthetic                                        | experimental          |                                                                                                                       | -1.26 | -1.40 | 0.08                   | -0.62 | -0.80 |       |         |  |
| 01503928    | 5-METHYLFURMETIDE                                 | 100122-24 | H08      | sample         | 1077-24-7                         | C8H14O2S2    | 206.32758 | hepatoprotectant                                                | synthetic; alpha-lipoic acid                     | JAN                   |                                                                                                                       | -0.41 | -0.13 | 2.91                   | 0.73  | 0.78  |       |         |  |
| 01504009    | LEVULINIC ACID, 3-BENZYLIDENYL-                   | 100122-24 | H09      | sample         | 1197-60-0                         | C18H18NO     | 281.13837 | muscarinic agonist                                              | synthetic                                        | experimental          | JACS 74:1868, 3455 (1992); Angewandte Chemie Int Ed 4:846 (1965); Arzneim Forsch 20:1210 (1970)                       | -0.55 | -0.75 | 3.75                   | -0.27 | 0.54  |       |         |  |
| 01503970    | METHOXYAMINE HYDROCHLORIDE                        | 100122-24 | H10      | sample         | 204-227-4                         | C12H17NO3    | 242.2764  |                                                                 |                                                  |                       |                                                                                                                       |       |       |                        |       |       |       |         |  |

|             |                                                                                 |           |          |                |                             |                |            |                                                                                                                   |                                                               |                       | Screen Score (z-score)                                                                                                                                       |       |        |       |       |         |
|-------------|---------------------------------------------------------------------------------|-----------|----------|----------------|-----------------------------|----------------|------------|-------------------------------------------------------------------------------------------------------------------|---------------------------------------------------------------|-----------------------|--------------------------------------------------------------------------------------------------------------------------------------------------------------|-------|--------|-------|-------|---------|
| Compound ID | MoName                                                                          | plate     | position | Content        | cas#                        | Formula        | MoWt       | Bioactivity                                                                                                       | Source                                                        | Status                | Reference                                                                                                                                                    | rep1  | rep2   | rep3  | rep4  | Average |
| 01005156    | N-PHENYLANTHRANILIC ACID                                                        | 100122-25 | C11      | sample         | 91-40-7                     | C13H11NO2      | 213.23812  | ion channel (Cl) blocker                                                                                          | synthetic                                                     | experimental          | Am J Physiol 253:C70 (1987); J Biol Chem 276:11575 (2001)                                                                                                    | NA    | 1.00   | 0.74  | -0.21 | 0.51    |
| 01005154    | 3-AMINO-1,2,4-TRIAZOLE                                                          | 100122-25 | C12      | 0.11% JAK2zhnb | 61-82-5                     | C2H4N4         | 84.08098   | catalase inhibitor                                                                                                | synthetic                                                     | experimental          | Biochem Pharmacol 42:699 (1991); Am J Physiol 270:H1165<br>Bull Soc Chim Fr 1967; 1960; Phytochemistry 7: 1385 (1968); 26: 2862 (1969)                       | NA    | -2.07  | 0.04  | -3.71 | -1.91   |
|             |                                                                                 | 100122-25 | D01      | 0.11% dmso     |                             |                |            |                                                                                                                   |                                                               |                       |                                                                                                                                                              | NA    | -1.86  | -1.71 | -0.43 | -1.34   |
|             |                                                                                 | 100122-25 | D02      | sample         |                             |                |            |                                                                                                                   |                                                               |                       |                                                                                                                                                              | NA    | -0.92  | -0.89 | -0.21 | -0.67   |
| 01005205    | MADECASSIC ACID                                                                 | 100122-25 | D03      | sample         | 18449-41-9                  | C30H48O6       | 504.71346  | wound healing                                                                                                     | Centella asiatica                                             | experimental          | 270:H1165                                                                                                                                                    | NA    | -1.28  | -1.39 | 2.24  | -0.14   |
| 01005163    | AURIN TRICARBOXYLIC ACID                                                        | 100122-25 | D04      | sample         | 4431-00-9                   | C22H14O9       | 422.35148  | apoptosis inhibitor, topoisomerase II inhibitor                                                                   | synthetic                                                     | experimental          | J Biol Chem 246:39 (1997)                                                                                                                                    | NA    | -0.42  | -0.88 | -0.06 | -0.45   |
| 01005167    | ACADESINE                                                                       | 100122-25 | D05      | sample         | 2627-69-2                   | C9H14N4O5      | 258.23573  | glucose uptake stimulant; AMPK activator                                                                          | synthetic                                                     | INN                   | J Biol Chem 229:558 (1995); Biochem J 338:783 (1999); J Mol Neurosci 17:45 (2001)                                                                            | NA    | -0.07  | 0.18  | 0.04  | 0.00    |
| 01005165    | 2-METHYL-4-(PIPERIDIN-1-YL-CARBOXY)-5-ISOPROPYLPHENYLTRIMETHYLAMMONIUM CHLORIDE | 100122-25 | D06      | sample         |                             | C19H31ClN2O2   | 354.92412  | squalene-2,3-oxide cyclase inhibitor, anticholesterolemic                                                         | synthetic                                                     | experimental          | Sherlock 74:6 (1993); J Biol Chem 250:1571 (1975)                                                                                                            | NA    | -0.92  | 0.61  | -0.20 | -0.17   |
| 01005164    | 4-(3-DISODIOTHIOYANOSTILBENE-2,2'-SUFONIC ACID SODIUM SALT                      | 100122-25 | D07      | sample         | 67483-13-0                  | C16H8N2Na2O6S4 | 498.48756  | ATP transport inhibitor, anion transport inhibitor, antitumor                                                     | synthetic; DIDS                                               | undetermined activity | EMBO J 12:69 (1993); Biochem Biophys Res Commun 207:375 (1995)                                                                                               | NA    | -0.29  | -0.07 | -0.12 | -0.16   |
| 01005298    | 3-ISOBUTYL-1-METHYLCXANTHINE (BMX)                                              | 100122-25 | D08      | sample         | 28822-58-4                  | C19H14N4O2     | 222.24868  | phosphodiesterase inhibitor                                                                                       | synthetic                                                     | experimental          | J Biol Chem 255:2616 (1980)                                                                                                                                  | NA    | 0.23   | 0.75  | 0.72  | 0.57    |
| 01005324    | BESSALICYL FLUMARATE                                                            | 100122-25 | D09      | sample         | 14222-60-5                  | C18H17NO4      | 356.29154  | crosslinking agent (hemoglobin)                                                                                   | synthetic                                                     | experimental          | Chemotherapy 26:276 (1980)                                                                                                                                   | NA    | -0.27  | 3.87  | -0.17 | 1.14    |
| 01005316    | PROTINAMIDE                                                                     | 100122-25 | D10      | sample         | 61422-40-5                  | C18H12N2S      | 180.27339  | antibacterial                                                                                                     | synthetic; TH-1321, RP-9778                                   | INN, BAN, JAN         | Am J Clin Oncology 13:477 (1990)                                                                                                                             | NA    | 0.13   | 1.97  | 0.43  | 0.84    |
| 01005317    | 0.11% JAK2zhnb                                                                  | 100122-25 | D12      | 0.11% JAK2zhnb |                             | C18H16FN3O3    | 257.26687  | antibacterial                                                                                                     | synthetic                                                     | experimental          | Eur J Cancer Clin Oncol 24:1415 (1988)                                                                                                                       | NA    | -2.77  | -0.86 | -2.49 | -2.04   |
|             |                                                                                 | 100122-25 | E01      | 0.11% JAK2zhnb |                             |                |            |                                                                                                                   |                                                               |                       |                                                                                                                                                              | NA    | -4.02  | -2.61 | -0.84 | -1.93   |
| 01005328    | 4'-DEMEHTYLEPIDOPOHYLLOTOXIN                                                    | 100122-25 | E02      | sample         | 3162-95-4                   | C9H13NO        | 151.21006  | antitumor                                                                                                         | synthetic                                                     | experimental          | Chem Pharm Bull 40:3113 (1992)                                                                                                                               | NA    | -6.87  | -2.24 | -1.62 | -3.58   |
| 01005339    | L-PHENYLANILINOL                                                                | 100122-25 | E03      | sample         | 64236-54-8                  | C12H14O4       | 222.24258  | COX-1 inhibitor                                                                                                   | synthetic                                                     | experimental          | Arch Biochem Biophys 317:19 (1995); OphthalmolVis Sci 39:1888 (1998)                                                                                         | NA    | -1.39  | -0.42 | 1.22  | 0.20    |
| 01005336    | VALERYL SALICYLATE                                                              | 100122-25 | E04      | sample         |                             | C12H14O4       | 222.24258  | COX-1 inhibitor                                                                                                   | synthetic                                                     | experimental          | Arch Biochem Biophys 317:19 (1995); OphthalmolVis Sci 39:1888 (1998)                                                                                         | NA    | 0.11   | -0.12 | 0.02  | 0.00    |
| 01005331    | 3,3'-DINDOLYL METHANE                                                           | 100122-25 | E05      | sample         | 1968-05-4                   | C17H14N2       | 246.31453  | apoptosis inducer                                                                                                 | synthetic                                                     | experimental          | Biochem Biophys Res Commun 228:153 (1996)                                                                                                                    | NA    | 1.20   | -0.96 | 0.37  | 0.20    |
| 01005337    | ELADOLYL-DESPHOSPHOLINE                                                         | 100122-25 | E06      | sample         |                             | C23H34N4O2     | 433.61711  | antiproliferative                                                                                                 | synthetic                                                     | experimental          | Arch Biochem Biophys 317:19 (1995); OphthalmolVis Sci 39:1888 (1998)                                                                                         | NA    | 0.76   | 0.85  | 0.60  | 0.45    |
| 01005342    | 7-NITROINDAZOLE                                                                 | 100122-25 | E07      | sample         | 2942-42-9                   | C7H5N3O2       | 163.1368   | NO synthase inhibitor                                                                                             | synthetic                                                     | experimental          | Eur J Pharmacol 310:115 (1996); TIPS 18:204 (1997)                                                                                                           | NA    | 0.82   | 0.09  | 0.45  | 0.20    |
| 01005253    | SINOMENINE                                                                      | 100122-25 | E08      | sample         | 115-53-7                    | C19H23NO4      | 329.39946  | weak abortifacient; immunosuppressant, analgesic, antiinflammatory; LD50 (po) 580 mg/kg; (ip) 285 mg/kg(mouse)    | synthetic                                                     | experimental          | Sinomenium acutum and Stephania cepharantha<br>Immunopharmacol 7: 33 (1985); Arzneim-Forsch 44: 1223 (1994)<br>Ber 58: 2267 (1925); J Nat Prod 28: 73 (1965) | NA    | 0.29   | 0.61  | -0.71 | 0.06    |
| 01005252    | PALMATINE                                                                       | 100122-25 | E09      | sample         | 3486-67-7                   | C21H24NO5      | 370.42913  | uterine contractant, antibacterial, antarrhythmic, inotropic, adrenocorticotrophic, anticholinesterase, analgesic | semisynthetic                                                 | experimental          | Jateorhesa palmata, Berberis spp                                                                                                                             | NA    | 2.60   | 0.50  | 0.41  | 1.17    |
| 01005395    | BICUCULINE(-)-METHIODIDE                                                        | 100122-25 | E10      | sample         | 59590-07-7                  | C21H20DN6      | 509.30105  | GABA-A antagonist                                                                                                 | synthetic; water soluble derivative of biocuculine (01500821) | experimental          | Brain Res 465:243 (1989); TIPS 20:288 (1999)                                                                                                                 | NA    | 0.56   | -0.41 | -0.30 | -0.05   |
| 01005930    | SR-2640                                                                         | 100122-25 | E11      | sample         | 103530-26-3                 | C23H18NO23     | 370.41151  | LT4/LTE4 antagonist                                                                                               | synthetic; 2[3-(quinolin-2-ylmethoxy)phenylamino]benzoic acid | experimental          | Annalen 485: 247 (1931); J Chem Soc 1955: 3252; J Immunopharmacol 7: 33 (1985); Arzneim-Forsch 44: 1223 (1994)<br>Agents Actions 29:299 (1990)               | NA    | 0.52   | 1.07  | -0.02 | 0.52    |
| 01005915    | 0.11% JAK2zhnb                                                                  | 100122-25 | E12      | 0.11% dmso     |                             | C19H14N4O3     | 238.24808  | PDE inhibitor, bronchodilator, vasodilator                                                                        | synthetic                                                     | INN, BAN, JAN         | J Org Chem 16:749 (1971); Adv Can Res 7:383 (1963)                                                                                                           | NA    | -0.26  | 3.29  | -0.73 | 0.77    |
|             |                                                                                 | 100122-25 | F02      | 0.11% JAK2zhnb |                             |                |            |                                                                                                                   |                                                               |                       |                                                                                                                                                              | NA    | -4.29  | -4.42 | -1.94 | -3.55   |
|             |                                                                                 | 100122-25 | F02      | sample         |                             |                |            |                                                                                                                   |                                                               |                       |                                                                                                                                                              | NA    | -1.42  | -1.22 | 0.29  | -0.78   |
| 01005785    | ETHIONINE                                                                       | 100122-25 | F03      | sample         | 54-30-8                     | C19H34ClN2O2   | 393.40103  | anticholinergic                                                                                                   | synthetic                                                     | INN, BAN, JAN         | NA                                                                                                                                                           | -2.00 | -1.07  | -1.17 | -1.08 |         |
| 01005849    | CATIONINE                                                                       | 100122-25 | F04      | sample         | 67-21-0                     | C18H13NO2S     | 263.24001  | antiproliferative; inhibitor DNA methylation                                                                      | synthetic                                                     | experimental          | J Org Chem 16:749 (1971); Adv Can Res 7:383 (1963)                                                                                                           | NA    | -0.60  | 0.22  | 1.75  | 0.46    |
| 01005946    | 11beta-HYDROXYPROGESTERONE HEMISUCCINATE                                        | 100122-25 | F05      | sample         | 41238-66-6                  | C29H44O5       | 430.54613  | glucocorticoid                                                                                                    | semisynthetic                                                 | INN, BAN              | USP, INN, BAN, JAN                                                                                                                                           | NA    | 0.15   | 1.71  | 0.21  | 0.61    |
| 01005880    | DIFLORASONE DIACETATE                                                           | 100122-25 | F06      | sample         | 33564-31-7                  | C26H32F2O7     | 494.53754  | antiinflammatory, glucocorticoid                                                                                  | semisynthetic; U-34865                                        | INN, INN, BAN, JAN    | USP, INN, BAN, JAN                                                                                                                                           | NA    | -0.87  | -1.11 | -0.79 | -0.92   |
| 01005986    | NIALAMIDE                                                                       | 100122-25 | F07      | sample         | 51-12-7                     | C18H18NO4      | 298.34746  | MAO inhibitor                                                                                                     | synthetic                                                     | INN, BAN              | Toxicol Appl Pharmacol 1:524 (1959); hepatotoxic at clinical dose (100mg)                                                                                    | NA    | 0.89   | 1.78  | -0.60 | 0.69    |
| 01005869    | AMPYRONE                                                                        | 100122-25 | F08      | sample         | 83-07-8                     | C11H13NO3      | 203.24576  | analgesic, antiinflammatory, antipyretic                                                                          | synthetic                                                     | synthetic             | USAN, NF                                                                                                                                                     | NA    | 1.04   | 0.05  | -0.71 | 0.13    |
| 01005742    | ASCORBYL PALMITATE                                                              | 100122-25 | F09      | sample         | 137-66-8                    | C22H38O7       | 414.54396  | antioxidant                                                                                                       | synthetic                                                     | INN, BAN              | J Forensic Sci 52:479 (2007)                                                                                                                                 | NA    | -1.41  | -1.11 | 2.27  | -0.09   |
| 01005773    | FAMPRIDAZONE                                                                    | 100122-25 | F10      | sample         | 22881-38-2                  | C24H31N3O      | 377.53417  | analgesic, antipyretic, CNS stimulant                                                                             | synthetic                                                     | INN, BAN              | J Pharm Pharmacol 10:40 (1958)                                                                                                                               | NA    | -0.44  | 1.19  | -0.41 | 0.11    |
| 01005774    | OXELADIN CITRATE                                                                | 100122-25 | F11      | sample         | 62432-72-1, 468-61-1 (base) | C24H34NO10     | 527.61737  | antitussive                                                                                                       | synthetic                                                     | INN, BAN              |                                                                                                                                                              | NA    | 0.01   | 0.38  | 0.41  | 0.26    |
| 01006010    | 0.04% JAK2zhnb                                                                  | 100122-25 | F12      | 0.04% dmso     |                             | G01            | 15895-39-5 | C5H12NO2S3                                                                                                        | synthetic                                                     | experimental          | Neurosignals 12:315 (2003); Physiol Res 55:353 (2006)                                                                                                        | NA    | 0.49   | 1.07  | 0.10  | 0.56    |
|             |                                                                                 | 100122-25 | G02      | 0.04% JAK2zhnb |                             |                |            |                                                                                                                   |                                                               |                       |                                                                                                                                                              | NA    | -3.66  | -3.14 | -1.64 | -2.81   |
| 01006041    | SALSOLINOL HYDROBROMIDE                                                         | 100122-25 | G03      | sample         | 38221-21-5                  | C10H14BrNO2    | 260.13256  | prolactin-releasing factor                                                                                        | synthetic                                                     | experimental          | JACS 75:5292 (1953)                                                                                                                                          | NA    | -0.179 | -0.12 | 0.73  | -0.39   |
| 01006051    | TRIMETHYLGLOCHINIC ACID                                                         | 100122-25 | G04      | sample         | 3482-37-9                   | C19H21NO5      | 343.38292  | antiproliferative                                                                                                 | synthetic                                                     | experimental          | Can Res 21:1015 (1961)                                                                                                                                       | NA    | -0.44  | -0.34 | -0.26 | -0.35   |
| 01006044    | THIOUANALCINE                                                                   | 100122-25 | G05      | sample         | 85-31-4                     | C10H13NO4S4    | 299.51021  | antiproliferative                                                                                                 | synthetic                                                     | INN, BAN              | Acta Derm Venereol Suppl (Stockh) 183:1 [1994]                                                                                                               | NA    | -0.12  | -0.05 | 0.61  | 0.14    |
| 01006078    | NORCORYDINE HYDROCHLORIDE                                                       | 100122-25 | G06      | sample         | 3731-69-7                   | C27H43ClN5O    | 427.66438  | antitumor                                                                                                         | synthetic; SKF-8888A, ABOB                                    | experimental          | Can Res 21:1015 (1961)                                                                                                                                       | NA    | -0.36  | -0.12 | 4.27  | 1.26    |
| 01006088    | TRIMETAZIDINE DIHYDROCHLORIDE                                                   | 100122-25 | G07      | sample         | 5011-34-7                   | C14H24ClN2O3   | 339.26498  | anti-anginal                                                                                                      | synthetic; 400045                                             | INN, BAN, JAN         | Circ Res 86:860 (2000); Am J Cardiovasc Drugs 3:361 (2003); Circulation 118:1250 (2008)                                                                      | NA    | -0.46  | 0.18  | 1.13  | 0.28    |
| 01001020    | DIETHYLTOLUAMIDE                                                                | 100122-25 | G08      | sample         | 134-62-3                    | C12H17NO       | 191.27539  | insect repellent                                                                                                  | synthetic; DEET                                               | USP, INN, BAN         |                                                                                                                                                              | NA    | 1.41   | -0.52 | -0.06 | 0.28    |
| 01004066    | METHOXYVONE                                                                     | 100122-25 | G09      | sample         | 266-29533                   | C17H14O3       | 266.29533  | anabolic                                                                                                          | synthetic                                                     | experimental          | NA                                                                                                                                                           | NA    | 0.65   | 0.37  | 2.48  | 1.17    |
| 01005029    | FLOPROFONE                                                                      | 100122-25 | G10      | sample         | 2295-56-1                   | C9H10Cl4       | 152.17765  | antispasmodic                                                                                                     | synthetic                                                     | INN, BAN              | NA                                                                                                                                                           | NA    | 0.46   | 1.04  | 0.57  | 0.69    |
| 01005666    | ACEMATACIN                                                                      | 100122-25 | G11      | sample         | 53164-05-9                  | C21H18ClNO6    | 415.83371  | antiinflammatory                                                                                                  | synthetic                                                     | INN, BAN, JAN         | NA                                                                                                                                                           | NA    | 0.19   | 1.21  | -0.15 | 0.42    |
| 01004050    | 0.04% JAK2zhnb                                                                  | 100122-25 | H01      | 0.04% dmso     |                             | C19H21N7O6     | 443.42252  | excitatory to methylextrate toxicity                                                                              | synthetic                                                     | experimental          | Nature 188:231 (1960); Compr Biochem 21:111 (1971); J Chem Soc (Perkin 1) 1985:1349; Tetrahedron 42:117 (1986)                                               | NA    | 0.24   | 2.75  | -0.70 | 0.76    |
|             |                                                                                 | 100122-25 | H02      | 0.04% JAK2zhnb |                             |                |            |                                                                                                                   |                                                               |                       |                                                                                                                                                              | NA    | -2.82  | -1.74 | -2.01 | -2.19   |
| 01006071    | DHYDROFLUOLIC ACID                                                              | 100122-25 | H02      | sample         | 4033-27-6                   | C19H21N7O6     | 443.42252  | excitatory to methylextrate toxicity                                                                              | synthetic                                                     | experimental          | Nature 188:231 (1960); Compr Biochem 21:111 (1971); J Chem Soc (Perkin 1) 1985:1349; Tetrahedron 42:117 (1986)                                               | NA    | -1.00  | -2.85 | 0.50  | -1.12   |
| 01007703    | ACETYLGLUTAMIC ACID                                                             | 100122-25 | H03      | sample         |                             | C11H17NO5      | 199.16942  | excitatory aminoacid                                                                                              | synthetic                                                     | experimental          | NA                                                                                                                                                           | NA    | -1.36  | -0.77 | 0.01  | -0.70   |
| 01000998    | ETHOXVQUIN                                                                      | 100122-25 | H04      | sample         |                             | C14H19NO       | 217.31363  | antioxidant                                                                                                       | synthetic                                                     | experimental          | NA                                                                                                                                                           | NA    | -2.15  | -0.98 | 0.50  | -0.88   |
| 01007705    | O-BENZYL-L-SERINE                                                               | 100122-25 | H05      | sample         |                             | C10H13NO3      | 195.22001  |                                                                                                                   | synthetic                                                     | undetermined activity | NA                                                                                                                                                           | NA    | -0.95  | 0.80  | 1.04  | 0.29    |
| 01007715    | ACETYLGLUCOSAMINE                                                               | 100122-25 | H06      | sample         |                             | C8H11NO6       | 221.21185  | antiarthritic                                                                                                     | synthetic                                                     | experimental          | NA                                                                                                                                                           | NA    | 0.34   | -0.50 | 0.70  | 0.18    |
| 01007710    | ACETYLPHENYLALANINE                                                             | 100122-25 | H07      | sample         |                             | C11H13NO3      | 221.23116  |                                                                                                                   | synthetic                                                     | undetermined activity | NA                                                                                                                                                           | NA    | 0.22   | 0.06  | -0.02 | 0.16    |
| 01007728    | 5,7-DIHYDROXY-4-METHYLCOMARIN                                                   | 100122-25 | H08      | sample         |                             | C10H8O4        | 192.17286  |                                                                                                                   | semisynthetic                                                 | undetermined activity | NA                                                                                                                                                           | NA    | 0.81   | 0.94  | 2.64  | 1.46    |
| 01008002    | ALLOXAN                                                                         | 100122-25 | H09      | sample         | 2244-11-3                   | C4H2N2O4       | 142.07154  | specific cytotoxin (pancreatic islet betacell)                                                                    | synthetic                                                     | experimental          | NA                                                                                                                                                           | NA    | 0.24   | 2.51  | 0.32  | 1.03    |
| 01009002    | SODIUM DEOXYCHOLATE                                                             | 100122-25 | H10      | sample         | 302-92-4                    | C24H39BrN4O4   | 414.56583  | choleric                                                                                                          | synthetic                                                     | experimental          | NA                                                                                                                                                           | NA    | -0.61  | 0.40  | -0.70 | -0.31   |
| 01001194    | TOLPERSONE HYDROCHLORIDE empty                                                  | 100122-25 | H11      | sample         | 70312-00-4                  | C16H24ClNO     | 281.62878  | muscle relaxant (skeletal)                                                                                        | synthetic; N-553                                              | INN, BAN, JAN         | NA                                                                                                                                                           | NA    | 1.26   | 1.74  | 0.26  | 1.09    |
|             |                                                                                 | 100122-25 | H12      | sample         |                             |                |            |                                                                                                                   |                                                               |                       |                                                                                                                                                              | NA    | NA     | NA    | NA    | NA      |
